# Supplementary material for: Interventions to increase access to or uptake of physical health screening in people with severe mental illness: a realist review
Source: PubMed Central journal article supplement — BMJ Open. 2018 Feb 10;8(2):e019412. doi: 10.1136/bmjopen-2017-019412 (PMC5829934; doi:10.1136/bmjopen-2017-019412), 2018-02-10
Supplement: bmjopen-2017-019412.draft_revisions.pdf [file bmjopen-2017-019412.draft_revisions.pdf]

# BMJ Open

BMJ Open is committed to open peer review. As part of this commitment we make the peer review history of every article we publish publicly available.

When an article is published we post the peer reviewers' comments and the authors' responses online. We also post the versions of the paper that were used during peer review. These are the versions that the peer review comments apply to.

The versions of the paper that follow are the versions that were submitted during the peer review process. They are not the versions of record or the final published versions. They should not be cited or distributed as the published version of this manuscript.

BMJ Open is an open access journal and the full, final, typeset and author-corrected version of record of the manuscript is available on our site with no access controls, subscription charges or pay-per-view fees (<http://bmjopen.bmj.com>).

If you have any questions on BMJ Open's open peer review process please email [editorial.bmjopen@bmj.com](mailto:editorial.bmjopen@bmj.com)

# BMJ Open

## Interventions to increase access to or uptake of physical health screening in people with severe mental illness: a realist review

|                                 |                                                                                                                                                                                                                                                                                                                                                                                                                                                                                                                                                                                                                                                                                                                                                                                                                    |
|---------------------------------|--------------------------------------------------------------------------------------------------------------------------------------------------------------------------------------------------------------------------------------------------------------------------------------------------------------------------------------------------------------------------------------------------------------------------------------------------------------------------------------------------------------------------------------------------------------------------------------------------------------------------------------------------------------------------------------------------------------------------------------------------------------------------------------------------------------------|
| Journal:                        | <i>BMJ Open</i>                                                                                                                                                                                                                                                                                                                                                                                                                                                                                                                                                                                                                                                                                                                                                                                                    |
| Manuscript ID                   | bmjopen-2017-019412                                                                                                                                                                                                                                                                                                                                                                                                                                                                                                                                                                                                                                                                                                                                                                                                |
| Article Type:                   | Research                                                                                                                                                                                                                                                                                                                                                                                                                                                                                                                                                                                                                                                                                                                                                                                                           |
| Date Submitted by the Author:   | 31-Aug-2017                                                                                                                                                                                                                                                                                                                                                                                                                                                                                                                                                                                                                                                                                                                                                                                                        |
| Complete List of Authors:       | Lamontagne-Godwin, Frederique; University of West London College of Nursing Midwifery and Healthcare, Richard Wells Research Centre<br>Burgess, Caroline; Kings College London, Institute of Psychiatry<br>Clement, Sarah; Freelance researcher<br>Gasston-Hales, Melanie; University of West London College of Nursing Midwifery and Healthcare<br>Greene, Carolynn; University of West London College of Nursing Midwifery and Healthcare<br>Manyande, Anne; University of West London - Brentford Site, School of Human and Social Sciences<br>Taylor, Deborah; University of West London College of Nursing Midwifery and Healthcare<br>Walters, Paul; Dorset HealthCare University NHS Foundation Trust<br>Barley, Elizabeth; University of West London - Brentford Site, School of Human and Social Sciences |
| <b>Primary Subject Heading</b>: | Public health                                                                                                                                                                                                                                                                                                                                                                                                                                                                                                                                                                                                                                                                                                                                                                                                      |
| Secondary Subject Heading:      | Mental health, General practice / Family practice, Health services research                                                                                                                                                                                                                                                                                                                                                                                                                                                                                                                                                                                                                                                                                                                                        |
| Keywords:                       | Organisation of health services < HEALTH SERVICES ADMINISTRATION & MANAGEMENT, Protocols & guidelines < HEALTH SERVICES ADMINISTRATION & MANAGEMENT, PRIMARY CARE, Adult psychiatry < PSYCHIATRY, PUBLIC HEALTH, Lipid disorders < DIABETES & ENDOCRINOLOGY                                                                                                                                                                                                                                                                                                                                                                                                                                                                                                                                                        |
|                                 |                                                                                                                                                                                                                                                                                                                                                                                                                                                                                                                                                                                                                                                                                                                                                                                                                    |

SCHOLARONE™  
Manuscripts

1  
2  
3 Title of the article: Interventions to increase access to or uptake of physical health screening in  
4 people with severe mental illness: a realist review  
5

6 Frédérique Lamontagne-Godwin<sup>1</sup>, Caroline Burgess<sup>2</sup>, Sarah Clement<sup>3</sup>, Melanie Gasston-Hales<sup>1</sup>,  
7 Carolynn Greene<sup>1</sup>, Anne Manyande<sup>4</sup>, Deborah Taylor<sup>1</sup>, Paul Walters<sup>5</sup>, Elizabeth Barley<sup>4</sup>  
8  
9

10 <sup>1</sup>University of West London, College of Nursing, Midwifery and Healthcare, London, UK.

11 <sup>2</sup>King's College London, Primary Care and Public Health Sciences, London, UK.

12 <sup>3</sup>Freelance researcher, UK.

13 <sup>4</sup>University of West London, School of Human and Social Sciences, London, UK.

14 <sup>5</sup>Dorset HealthCare University NHS Foundation Trust, Bournemouth, UK.  
15  
16  
17

18 Full name, postal address, e-mail and telephone number of the corresponding author:  
19  
20

21 Frédérique Lamontagne-Godwin

22 Richard Wells Research Centre

23 College of Nursing, Midwifery and Healthcare

24 The University of West London

25 Paragon House

26 Boston Manor Road

27 Brentford, Middlesex

28 TW8 9GA

29 United Kingdom

30 [Frederique.lamontagne-godwin@uwl.ac.uk](mailto:Frederique.lamontagne-godwin@uwl.ac.uk)

31 +44 (0)20 8209 4145  
32  
33  
34  
35  
36

37 Word count, excluding title page, abstract, references, figures and tables: 4,000  
38  
39  
40  
41  
42  
43  
44  
45  
46  
47  
48  
49  
50  
51  
52  
53  
54  
55  
56  
57  
58  
59  
60

## ABSTRACT

**Objectives:** To identify and evaluate interventions aimed at increasing uptake of, or access to, physical health screening by adults with severe mental illness; to examine why interventions might work.

**Design:** Realist Review.

**Setting:** Primary, secondary and tertiary care.

**Results:** A systematic search identified 1448 studies, of which 22 met the inclusion criteria. Studies were from Australia (n =3), Canada (n =1), Hong Kong (n =1), United Kingdom (n =11) and United States (n =6). The studies focused on breast cancer screening, infection preventive services and metabolic syndrome (MS) screening by targeting MS-related risk factors. The interventions could be divided into those focusing on 1) health service delivery changes (12 studies), using quality improvement, RCT, cluster randomized feasibility trial, retrospective audit, satisfaction survey, and cross sectional study designs, and 2) tests of tools designed to facilitate screening (10 studies) using consecutive case series, quality improvement, retrospective evaluation, and pre-post audit study designs. All studies reported improved uptake of screening, though no estimation of overall effect size was possible due to heterogeneity in study design and quality. The following factors may contribute to the success of interventions: screening 'champions' and staff feeling invested in health screening; stakeholder involvement; staff using less invasive equipment and tests; strong links with primary care and a pharmacist on the ward to advise on medication.

**Conclusions:** A range of interventions may be effective, but better quality research is needed to determine any effect size. Researchers should consider how interventions may work when designing and testing them in order to target better the specific needs of this population in the most appropriate setting. Behaviour change interventions to reduce identified barriers of patient and health professional resistance to screening this population are required. Resource constraints, clarity over professional roles and better coordination with primary care need to be addressed.

### Strengths and limitations of this study:

- In line with the realist review methodology, a broad and inclusive study identification process was used, which was adapted iteratively to compensate for the inconsistency around how terms such as 'screening' and 'monitoring' are used.
- A realist review explores why interventions might work in a particular setting however studies provide limited evidence for this so transferability of knowledge to other settings is limited.

- A realist review is often selected to understand complex interventions, however behaviour change theory was not included in almost any intervention design, making it impossible to discern which 'active ingredients' are at work to produce the results.

## INTRODUCTION

People with severe mental illness (SMI), such as schizophrenia or bipolar disorder, have been found to have a 2-3 fold increased risk of premature mortality<sup>1</sup>. A reduction in life expectancy of 10-20 years has been reported<sup>(2,3)</sup>. A significant cause of this disparity is attributed to preventable and treatable long-term physical health conditions, with cardiovascular disease and cancer as the first and second leading cause of death respectively in this group<sup>(2,4)</sup>. Cancer mortality in people with SMI is more likely than in the general population<sup>5</sup>, though the incidence of disease is similar for both groups<sup>6</sup>. One factor which contributes to inequality in survival rates is access to cancer screening<sup>7</sup>. The reported 30% higher case fatality rate from cancer, may partly be due to those with SMI being more likely to present with metastases at diagnosis<sup>5</sup>.

Other physical health conditions found to be more prevalent in people with SMI include type 2 diabetes and metabolic syndrome (MS)<sup>(8,9)</sup>, tuberculosis, HIV, osteoporosis, poor dentition, impaired lung function, sexual dysfunction and obstetric complications<sup>2</sup>. MS is defined by the World Health Organisation<sup>10</sup> as glucose intolerance, diabetes mellitus and/or insulin resistance, with two or more of the following: central obesity [ $>0.9$  in men and  $>0.85$  in women and/or body mass index (BMI)  $>30$  kg/m<sup>2</sup>], raised arterial pressure [ $\geq 140/90$  mmHg], microalbuminuria [ $\geq 20$   $\mu$ gm/minute or albumin/creatinine ratio  $\geq 30$   $\mu$ gm/mg] and raised plasma triglyceride [ $\geq 150$  mg/dl and/or low HDL-C ( $<35$  mg/dl in men and  $<39$  mg/dl in women)].

Health screening facilitates early detection and treatment for many of these conditions, though rates of screening in people with SMI may be reduced compared to the general population. A UK survey<sup>11</sup> found that only 33% of people with schizophrenia had received adequate CVD screening in the previous 12 months and, internationally uptake of breast, cervical and bowel cancer screening has been found to be lower among people with SMI<sup>(6,12-15)</sup>. Effective interventions for increasing access to, or uptake of, screening for a range of conditions in the general population<sup>16</sup> exist. In relation to cancer screening, a Cochrane review<sup>17</sup> found that no intervention to promote uptake has been tested in people with SMI. This is important since qualitative work<sup>18</sup> indicates there are specific barriers to cancer screening uptake in people with SMI and that interventions effective in the general population may not be in the SMI population. Furthermore, barriers to screening uptake or

1  
2  
3 access may vary for different types of screening, at different stages of the screening process and  
4 between individuals<sup>18</sup>.  
5

6  
7 Realist review methodology<sup>19</sup> has been devised to enable synthesis of diverse literature in order to  
8 explore not only what works for whom, as in traditional systematic reviews, but also why an  
9 intervention may work<sup>20</sup>.  
10  
11

12  
13  
14 By drawing on this methodology, our objectives were to identify and evaluate interventions which  
15 may increase uptake of, or access to, any kind of physical health screening by adults with SMI, and to  
16 determine what works for whom in what setting and why. The review is described in accordance  
17 with the RAMESES reporting guidance for realist reviews<sup>21</sup>.  
18  
19

## 20 **METHODS**

### 21 **Study Selection**

#### 22 Inclusion and exclusion criteria

23  
24  
25  
26  
27 Studies of any intervention to promote access to, or uptake of, screening or monitoring for any  
28 physical health condition where participants were aged 18 years and over with a diagnosis of SMI  
29 (psychosis or bipolar disorder however diagnosed) were eligible. The UK National Screening  
30 Committee defines screening as a 'public health service in which members of a defined population  
31 (...) are asked a question or offered a test, to identify those individuals who are more likely to be  
32 helped than harmed by further tests or treatment to reduce the risk of a disease or its  
33 complications'<sup>22</sup>. 'Monitoring' was defined in a Cochrane<sup>23</sup> review as a means 'to obtain information  
34 which can then be acted on to treat or prevent a physical health problem'. We included any  
35 intervention described as promoting either screening or monitoring; for clarity the term 'screening'  
36 is used throughout. Only studies reported in English were included.  
37  
38  
39  
40  
41  
42

43  
44 In line with the realist approach to literature synthesis<sup>19</sup>, an inclusive approach was taken and  
45 intervention studies of any design were eligible as long as the full text was published in a peer  
46 reviewed journal. We also excluded intervention studies to improve physical health in people with  
47 SMI which may involve screening, but where uptake or access to screening was not a main outcome  
48 and service evaluations or audits which considered screening, but did not test any intervention.  
49  
50

#### 51 Search Strategy

52  
53  
54 The protocol is published on the PROSPERO database<sup>24</sup>. The search strategy (Appendix 1) was  
55 informed by published, related systematic reviews<sup>(8,17,20)</sup> and was checked by a specialist health  
56  
57  
58  
59

1  
2  
3 librarian at the University of West London (Marc Forster PhD). Searching was conducted in  
4 December 2016.  
5

#### 6 7 Data sources

8  
9 Medline, Embase, Cumulative Index to Nursing and Allied Health Literature (CINAHL), PsychINFO,  
10 Cochrane Database of Systematic Reviews, Database of Abstracts of Reviews of Effectiveness.  
11 Reference chaining of identified studies was also conducted. No date restrictions were applied.  
12  
13  
14  
15

#### 16 Search results

17  
18 The initial electronic search identified 1872 potentially relevant publications; six others were  
19 identified through reference chaining. Titles and abstracts were screened independently by two  
20 team members (EB and AM). Thirty-three full texts were retrieved and screened by at least two  
21 team members (EB, AM, DT). Among the thirty-three full texts was a recent systematic review of  
22 studies of 'Strategies to implement physical health monitoring in people affected by severe mental  
23 illness'<sup>25</sup> which included 14 studies. Though the focus of this review was slightly different from the  
24 current, it contained one study which we had included<sup>26</sup>. It also included two studies which we had  
25 excluded: one<sup>27</sup> was not an intervention study, the other tested the validity of a health monitoring  
26 tool<sup>28</sup>. This led to a team discussion whereby it was decided that studies of interventions, such as  
27 health monitoring tools, were relevant to our review question. The rationale being that, although  
28 the aim of such studies was to improve the quality of screening (e.g. more health indicators  
29 measured) and ongoing monitoring, this often resulted in increased uptake. We re-screened our  
30 identified studies and those included in this review<sup>25</sup>. 44 studies were identified as potentially  
31 relevant and were screened by two reviewers. Twenty-two of these did not meet the inclusion  
32 criteria, a total of 22 studies were included. The screening and study selection processes are detailed  
33 in Figure 1.  
34  
35  
36  
37  
38  
39  
40  
41  
42  
43  
44

45 **Figure 1.** PRISMA Flow Diagram of intervention studies included and excluded from this review  
46  
47

#### 48 Data extraction

49  
50 Each reviewer independently extracted information from up to 5 articles, with one author (EB)  
51 reviewing all studies. Data were extracted regarding study authors, geographical location and  
52 setting, year of publication, participant characteristics, features of the intervention, target of  
53 screening, outcome measures, study design and limitations.  
54  
55  
56  
57  
58  
59  
60

## Approach to synthesis

Similarities in intervention approach were identified and summarized across studies. Exploration of how and why different approaches might have worked was undertaken by searching for themes across studies, paying particular attention for disconfirming evidence. As there was considerable between-study variation in outcome measures meta-analysis was not possible.

## RESULTS

### Study characteristics

Study characteristics are detailed in Tables 1 and 2. Two studies<sup>(29,30)</sup> included breast cancer screening, one<sup>30</sup> considered infection preventive services and 21 studies considered metabolic syndrome screening by targeting MS-related risk factors (blood pressure (BP)<sup>(26,28-31,33-46)</sup>, cholesterol/sugar<sup>(26,28,30,31-45,47)</sup> and BMI<sup>(26,28,30,31-46)</sup>). Two studies involved national screening programmes<sup>(29,30)</sup> and 20 studies developed 'in-house' screening<sup>(26,28,31-47)</sup>. Study populations included participants with schizophrenia<sup>(28-31,33-35,37-38,40,44-47)</sup>, bipolar disorder<sup>(28-31,33,35,38,44-47)</sup>, schizoaffective disorder<sup>(28,29,31,33,35,44-47)</sup>, other psychotic disorders<sup>(28,30,34-35,38,45-46)</sup> and other mental health disorders<sup>(29-31,33,38,44-47)</sup>. Some studies did not specify the SMI<sup>(26,39,42-43)</sup> while other studies included patients on antipsychotics<sup>(32,36,41,46)</sup> with no breakdown by condition.

A range of study designs was employed (pre-post audit n=9, consecutive prospective case series design n=1, repeat audit n=1, cross-sectional study n=1, QI n=4, retrospective audit n=4, RCT n=1, cluster randomized feasibility trial n=1). Study quality of randomized trials<sup>(45-46)</sup> was assessed using the Cochrane tool<sup>49</sup> for assessing risk of bias. No similar 'gold standard' tool exists which could be used across the other study designs, so we assessed each study informed by the STrengthening the Reporting of OBservational studies in Epidemiology<sup>50</sup>. Each study was rated independently by two reviewers with discrepancies resolved by discussion. Flaws relating to the reliability of findings or the generalizability of results were highlighted in all studies (Tables 1-2); these data suggest that findings concerning the size of effect should be considered with caution.

### Review outcomes

Interventions to increase *uptake* of screening are defined as interventions which support health professionals to screen for physical health conditions<sup>(28,32-48)</sup>. Interventions to increase *access* to screening are defined as interventions (targeted at health professionals or health service delivery) to increase patient/client access to screening<sup>(26,29-31)</sup>.

### Intervention effects



1  
2  
3 Overall, improvements in rates of screening were reported in all studies following intervention  
4 (Tables 1-2). This appeared to be independent of screening type or study design. We identified an  
5 evidence gap as only three studies<sup>(31-32,48)</sup> reported whether the results of screening were acted  
6 upon, for instance through referral or clinical intervention.  
7  
8

### 9 10 **Intervention type**

11  
12 Studies broadly either tested a new tool to facilitate screening for health professionals<sup>(28,32-33,35-39,47)</sup>  
13 (table 1) or made complex health services delivery changes<sup>(26,29-31,40-46,48)</sup> (table 2). One intervention<sup>26</sup>  
14 primarily targeted service users, though in other studies<sup>(29,40,44)</sup> service user-focused interventions  
15 were included, for instance targeted education<sup>(33,40)</sup>, self-management support<sup>44</sup> or support to  
16 attend screening<sup>29</sup>. Most studies included staff education<sup>(38,40,43,45-46,48)</sup> and training<sup>(28,33,35,39,42)</sup> as part  
17 of the intervention.  
18  
19  
20  
21  
22

23  
24 The data collection tools tested in Table 1 were designed to gather information required to improve  
25 MS screening<sup>(32-33,38,47)</sup> or physical health monitoring<sup>(28,34-37,39)</sup>. MS monitoring was evaluated using the  
26 following measurements: BP, smoking status, waist circumference (WC), fasting blood glucose (BG),  
27 BMI triglycerides and high density lipoprotein cholesterol. These measures were based on the  
28 following clinical guidelines: National Institute for health and Care Excellence<sup>(26,31,35-37,39,40-41)</sup>,  
29 Maudsley prescribing guidelines<sup>(34,37,40-42)</sup>, U.S. Preventive Services Task Force<sup>(30,44)</sup>, National Heart,  
30 Lung and Blood Institute<sup>33</sup>, American Diabetes Association<sup>(32-34,38,47)</sup>, Early Psychosis Prevention and  
31 Intervention Centre<sup>43</sup>, Psychotropic Therapeutic Guidelines<sup>48</sup>, American Psychiatric Association  
32 Practice<sup>(28,38)</sup> and de Hert (2009) guidelines<sup>35</sup>. Most interventions were multi-faceted so will appear  
33 in more than one cluster. As no studies were rated of good or moderate quality it was difficult to  
34 assess whether findings of improvements in rates of screening are valid. The size of effect was not  
35 reported for any study.  
36  
37  
38  
39  
40  
41  
42  
43

44 **Screening template:** Eight studies<sup>(28,32-34,36-39)</sup> evaluated the effectiveness of using a screening tool to  
45 increase uptake and raise staff awareness of physical health screening. Barriers to successful  
46 intervention implementation included 'social desirability bias'<sup>(28,36)</sup> (patients self-report their health  
47 behaviour in an overly positive picture in an effort to please their keyworkers); low uptake of  
48 invasive test measurements e.g. WC<sup>(32,37)</sup>, BP<sup>38</sup>, fasting BG<sup>(33,37)</sup> and of data on sensitive topics<sup>36</sup>;  
49 difficulty to capture monitoring results onto the tool<sup>(28,32,38-39)</sup>; difficulty in obtaining equipment<sup>(37-38)</sup>  
50 and accessing laboratory services<sup>33</sup>; lack of integration with primary care for treatment or  
51 referral<sup>(33,37-38)</sup>; appointment non-adherence<sup>(32-33)</sup>; lack of expertise in mental health professionals to  
52  
53  
54  
55  
56  
57  
58  
59

1  
2  
3 interpret physical health results<sup>(34,37)</sup>; workload issues<sup>(32-33,38)</sup>; staff reluctant to see MS screening as  
4 their responsibility<sup>(32-33,34)</sup>. Authors across studies identified the following facilitators: investment of  
5 staff in physical health monitoring<sup>(33,36-37,39)</sup> and staff flexibility by using alternative equipment and  
6 tests<sup>(33,39)</sup>.  
7  
8  
9

10 **Staff education and training:** Five studies<sup>(28,33,35,38-39)</sup> included staff training as a component of the  
11 intervention. No author described the content or format of education interventions in detail.  
12 Barriers to successful intervention implementation included workload issues<sup>(33,35,38)</sup>; lack of training  
13 to spot 'social desirability bias'<sup>28</sup>; lack of training in mean WC measurement<sup>28</sup>. The following  
14 facilitators were identified: 'booster' education and team meetings<sup>33</sup> and investment of staff in  
15 physical health monitoring<sup>(33,39)</sup>.  
16  
17  
18  
19  
20

21 **Computer or paper prompt for staff:** Four studies<sup>(34,37,39,47)</sup> tested a computer or paper based  
22 prompts to support clinicians to monitor and screen physical health indicators. Barriers to the  
23 successful implementation of the intervention included technical constraints in terms of collecting  
24 measurement results<sup>(39,47)</sup>; low uptake of invasive test measurements e.g. WC<sup>37</sup> and fasting BG<sup>(37,47)</sup>;  
25 lack of expertise from mental health professionals to interpret physical health results<sup>(34,37)</sup>; unclear  
26 communication channel between primary and secondary care<sup>(34,37)</sup> and limited access to equipment  
27 and resources<sup>(34,37)</sup>. Having a clinical psychiatric pharmacist on the ward to remind clinicians to  
28 request investigations such as blood tests when appropriate and to provide the relevant guidelines  
29 and precautions when initiating hypolipidemic medication was a facilitator in two studies<sup>(37,47)</sup>.  
30  
31  
32  
33  
34  
35  
36

37 Table 2 describes twelve studies which tested interventions that delivered change in a health service  
38 setting. Most interventions were multi-faceted so appear in more than one cluster. All studies  
39 targeted adults, though in one study<sup>42</sup> eligible participants were 14-35 years old. Studies took place  
40 in a clozapine clinic<sup>48</sup>, Early Intervention in Psychosis Services<sup>(41-43)</sup>, Community Mental Health Team  
41 (CMHT)<sup>(31,44-45)</sup>, community drop-in centre<sup>29</sup> and primary care<sup>(26,30)</sup>. Interventions were focused on  
42 metabolic/cardiovascular screening for all studies, except one<sup>29</sup> which was designed to increase  
43 rates of mammography uptake. One study<sup>30</sup> monitored uptake of national cancer screening services  
44 and metabolic screening. The size of effect was not reported for any study. All studies reported sub-  
45 optimal screening and monitoring at baseline, with improved levels post intervention. However,  
46 limited evidence of actions, such as referral or intervention, occurring as a result of these  
47 improvements was reported.  
48  
49  
50  
51  
52  
53  
54  
55  
56  
57  
58  
59  
60

1  
2  
3 **Staff education and training:** Six studies<sup>(40,42-43,45-46,48)</sup> provided some kind of staff (working in primary  
4 and secondary care) and patient education. All studies described increased rates of monitoring  
5 following the interventions. One study<sup>45</sup> was rated as good quality, so generalization of results is  
6 limited. Barriers to the successful implementation of the intervention included staff time  
7 constraints<sup>(40,48)</sup>; poor communication across the primary and secondary care interface<sup>(43,45)</sup> and lack  
8 of clarity over scope of practice<sup>48</sup>; patient resistance to invasive tests<sup>(42,46)</sup>; staff resistance to  
9 change<sup>(40,45,46)</sup> and staff turnover<sup>(43,46)</sup>. Facilitators included team ownership and team 'champions' to  
10 encourage screening<sup>(40,42)</sup> and high visibility/structure around monitoring and better liaison with  
11 primary care<sup>(42,48)</sup>.  
12  
13  
14  
15  
16  
17

18 **Invitation letter to physical health screening:** Three studies<sup>(26,40,42)</sup> used an invitation letter from  
19 primary care to encourage patients to attend screening as part of a physical health check-up. All  
20 studies described increased rates of monitoring following the interventions. Barriers to the  
21 successful implementation of the intervention included patient resistance to invasive tests<sup>42</sup> and  
22 staff resistance to change<sup>40</sup>. Facilitators included team<sup>(40,42)</sup> ownership and team 'champions' to  
23 encourage screening; getting stakeholders involved<sup>(40,42)</sup> and living in a suburban<sup>26</sup> (rather than  
24 urban) area.  
25  
26  
27  
28  
29  
30

31 **Improving access to monitoring resources:** Four studies<sup>(41,43,46,48)</sup> tested interventions developed to  
32 improve the collection of physical health data to increase screening. Barriers to the successful  
33 implementation of the intervention included patient resistance and lack of motivation in the  
34 screening process<sup>(41,46)</sup>; inadequate links with primary care<sup>(41,43)</sup>; no clarity about who takes  
35 responsibility for screening<sup>(41,48)</sup>; staff turnover<sup>(43,46)</sup>; staff not perceiving physical health screening as  
36 a priority<sup>(41,46)</sup>; time and resource (screening equipment) constraints<sup>(41,48)</sup>; poor recording and  
37 knowledge of screening guidelines and tests<sup>(41,48)</sup>. Facilitators included high visibility and structure  
38 around monitoring<sup>48</sup> and having a key worker system with key worker's duties involving screening<sup>41</sup>.  
39  
40  
41  
42  
43  
44

45 **Integrating care across health settings:** Seven studies<sup>(29-31,40,42,44-45)</sup> were developed to evaluate and  
46 reduce the fragmentation of care between different care providers. New clinics to improve physical  
47 healthcare were set up and evaluated<sup>(29-31)</sup>, two trials<sup>(44-45)</sup> evaluated nurse-led care management  
48 and two studies audited improvement in awareness<sup>42</sup> and communication<sup>40</sup> within the  
49 multidisciplinary care coordination team. All reported improvement in physical health monitoring or  
50 uptake of screening tests post intervention. Two studies<sup>(44-45)</sup> were rated as good quality. One study<sup>44</sup>  
51 reported improvement in cardiovascular disease risk among intervention subjects of an effect size  
52  
53  
54  
55  
56  
57  
58  
59  
60

1  
2  
3 comparable to that seen in underserved populations without mental illness. Barriers to the  
4 successful implementation of the intervention included lack of coordination across the primary and  
5 secondary care interface<sup>(30,45)</sup>; patient reluctance to attend appointment/undergo screening<sup>(29,42)</sup>;  
6 staff resistance to change<sup>(40,45)</sup> and lack of a prescribing provider<sup>44</sup>. Facilitators included team  
7 investment in screening procedure and stakeholder involvement<sup>(29,31,40,42)</sup>; psychosocial support and  
8 trust between patients and staff to help them obtain screening<sup>(29,44)</sup> and availability of primary and  
9 specialist care<sup>(29,30,42,45)</sup>.

10  
11  
12  
13  
14  
15 **Staff accompaniment to appointments:** Three studies<sup>(29,33,40)</sup> included accompaniment of service  
16 users to appointments as part of their intervention. This type of intervention addresses potential  
17 difficulties in locating and visiting unfamiliar places which has been reported as a barrier to cancer  
18 screening uptake by some service users<sup>18</sup>. One study<sup>33</sup> from Table 1 was added to this cluster as it  
19 included staff accompaniment to screening. Barriers to the successful implementation of the  
20 intervention included staff workload issues<sup>(33,40)</sup>; difficulty to engage staff<sup>(33,40)</sup>; patient reluctance to  
21 undergo screening<sup>(29,33)</sup> and difficulty to obtain an appointment/appointment non-adherence<sup>(29,33)</sup>.  
22 Facilitators included staff feeling invested/having a sense of ownership with regard physical health  
23 screening<sup>(29,33,40)</sup>; having access to primary care/in-home phlebotomy services<sup>(29,33)</sup> and trust between  
24 clients and staff<sup>(29,33)</sup>.

## 31 32 33 **DISCUSSION**

### 34 **Statement of principal findings**

35  
36 A large international body of work was identified with diversity in the number of physical health  
37 conditions and clinical settings. Challenges to increase uptake of physical health screening and  
38 monitoring in people with SMI was not unique to a particular country, setting or health service  
39 configuration. The studies illustrate that people with SMI come into contact with a number of  
40 different health services. Overall there appears to be no strong evidence as to whether an  
41 intervention to increase uptake of screening would be better suited in primary or secondary care.  
42  
43  
44  
45  
46  
47

48 Identified barriers to the successful implementation of tools to facilitate screening can be clustered  
49 into resource constraints, environmental barriers, unclear boundaries around professional role and a  
50 perceived lack of professional skills and training. Authors in several studies<sup>(33,34,37,38,39,47)</sup> noted a  
51 number of logistical and resource constraints to the successful collection of measurements due to  
52 limited staff time<sup>(32,33,35,38)</sup> and difficulty accessing monitoring equipment (such as specific WC tool for  
53 obese patients and access to BP monitors in CMHTs). Staff also reported difficulties capturing  
54  
55  
56  
57  
58  
59  
60

1  
2  
3 monitoring results onto the tool<sup>(28,32,38,39)</sup> (e.g. complicated guidelines to follow). Other barriers  
4 included patient resistance to exploring sensitive topics such as sexual health, and transportation,  
5 cultural and language barriers to access phlebotomy clinics and arranging an appointment.  
6  
7

8  
9 Authors in several studies<sup>(32,33,36,37,38,47)</sup> noted low uptake of invasive test measurements e.g. WC,  
10 fasting (BG) and appointment non-adherence to cancer screening and MS monitoring. Lack of  
11 integrated care between mental health services and primary care<sup>(33,34,37,38)</sup> for treatment and referral  
12 post-diagnosis was another barrier. Some mental health staff were reluctant to see MS screening as  
13 their responsibility<sup>(32,33)</sup>, leading to resistance to engage in this activity. The lack of training to collect  
14 WC data in a uniform way, and unawareness of a potential 'social desirability bias'<sup>(28,36)</sup>, lead to the  
15 risk of unreliable results. Lastly, a perceived lack of expertise from mental health professionals to  
16 interpret physical health results<sup>(34,37)</sup> was raised as a potential barrier.  
17  
18  
19  
20  
21  
22

23 Several facilitators to the successful implementation of tools to facilitate screening were identified,  
24 including staff feeling invested and having a sense of 'ownership' in physical health  
25 monitoring<sup>(33,36,37,39)</sup>, staff flexibility around taking measures by using alternative (e.g. less invasive)  
26 equipment and tests<sup>(33,39)</sup> and having a clinical psychiatric pharmacist<sup>(37,47)</sup> on the ward to support  
27 mental health professionals e.g. by reminding staff to request blood tests and provide the relevant  
28 guidelines and precautions to follow when hypolipidemic agents are prescribed.  
29  
30  
31  
32  
33

34 Barriers to the successful implementation of health service delivery changes are clustered into  
35 resource constraints, environmental barriers, unclear boundaries around professional role and  
36 patient resistance. Authors note lack of time<sup>(33,40,47)</sup> for health professionals to allocate to screening  
37 as a barrier as well as staff turnover<sup>(43,46)</sup> and other resource constraints<sup>(41,44,47)</sup> such as lack of  
38 screening equipment and a prescribing provider. Environmental barriers include lack of coordination  
39 across the primary and secondary care interface<sup>(30,41,43,45)</sup> and difficulty for patients and staff to  
40 obtain a screening appointment<sup>(29,33)</sup>. Reluctance to engage in screening was observed from the  
41 clinician and patient perspective. In staff, limited clarity over who takes responsibility for  
42 screening<sup>(41,48)</sup> was a barrier, as well as difficulty to engage staff<sup>(33,40)</sup> in the project, staff resistance to  
43 change<sup>(40,45,46)</sup> and staff not perceiving physical health screening as a priority<sup>(41,46)</sup>. In patients,  
44 reluctance to engage with screening was identified as lack of motivation/skepticism in the screening  
45 process<sup>(41,46)</sup>, appointment non-adherence<sup>(29,33,42)</sup> and particular resistance to invasive tests<sup>(42,46)</sup>.  
46  
47  
48  
49  
50  
51  
52  
53  
54  
55  
56  
57  
58  
59  
60

1  
2  
3 Facilitators to the successful implementation of health service delivery changes include having team  
4 'champions' or a key worker to encourage screening, having staff that feel invested/a sense of  
5 ownership with regard physical health screening<sup>(29,33,40,41,42)</sup>, stakeholder involvement<sup>(29,31,40, 42)</sup>,  
6 having strong links to primary care and specialist services<sup>(29,30,33,42,45,48)</sup> including at-home phlebotomy  
7 services and established trust between clients and staff<sup>(29,33,44)</sup>. Barriers to the successful  
8 implementation of tools and health service delivery changes to facilitate screening include workload  
9 issues, resource constraints such as difficulty accessing monitoring equipment, patient resistance to  
10 screening and difficulty in arranging an appointment, fragmented links between primary and  
11 secondary care, unclear professional role boundaries for screening and staff resistance to engage in  
12 screening. Facilitators to the successful implementation of tools and health service delivery changes  
13 to facilitate screening include staff feeling invested and a sense of 'ownership' to engage in physical  
14 health monitoring.

15  
16  
17  
18  
19  
20  
21  
22  
23 The quality of data identified was generally low, it is therefore not possible to determine the size of  
24 effect any intervention may have. Several potentially useful intervention approaches were identified  
25 however. A key aim of this review was to identify what approach worked for whom. However, this  
26 was not achieved since few studies tested this. Nevertheless, the review identified specific barriers  
27 and facilitators to screening uptake or access in people with SMI which should be considered in  
28 future studies.

29  
30  
31  
32  
33  
34 Future studies should be reported using the TiDieR guidelines<sup>49</sup> and Medical Research Council  
35 (MRC)<sup>50</sup> guidance to make explicit how the components of complex interventions may work.  
36 Similarly, use of behaviour change theory was not considered in intervention design – some studies  
37 acknowledged it was not considered – which provides no insight into what might have impacted on  
38 staff and service user behaviour to increase uptake. Few interventions were designed in  
39 collaboration with service users, nor were their preferences explored.

40  
41  
42  
43  
44 There are no longitudinal studies therefore this review is unable to clarify if screening is maintained  
45 post intervention and whether the increase in uptake is sustainable or a consequence of the  
46 Hawthorne effect whereby health professional behavior reacts to being observed. An evidence gap  
47 was identified as only three studies<sup>(31-32,46)</sup> reported on whether the results of screening were acted  
48 upon, for instance through referral or clinical intervention. One study<sup>33</sup> aims to make annual MS  
49 screening a 'routine responsibility' for the mental health team but acknowledges it cannot refer  
50 patients to primary care.

#### 51 52 53 54 **Study limitations**

1  
2  
3 There is inconsistency around how terms such as 'screening' and 'monitoring' are used which  
4 hampers comparative exercises. Our method of deploying them may differ to that of others who  
5 may use different terms and include different studies. To compensate for this, and in line with realist  
6 review methodology, we used a broad and inclusive study identification process which we adapted  
7 iteratively through the study selection process, as described above. We identified a wide range of  
8 studies with varied participants, settings, interventions and intervention targets; a narrower review  
9 may provide answers which are more applicable to particular situations, however, the lack of good  
10 quality evidence identified suggests that this is unlikely to be the case.  
11  
12  
13  
14  
15

## 16 17 **CONCLUSION**

### 18 **Policy implications**

19 Interventions to reduce patient and health professional resistance to screening which are informed  
20 by behaviour change theory should be developed and tested. Strategies to improve coordination  
21 between primary and secondary care are also needed, as are guidelines to clarify professional role  
22 boundaries. Resource constraints such as staff time and lack of monitoring equipment in mental  
23 health settings need to be addressed in the various clinics where screening occurs. Involving service  
24 users in intervention design is also important so that their preferences for location, frequency and  
25 type of support can be identified and targeted. Consideration of how interventions are likely to  
26 work should be made during development and testing.  
27  
28  
29  
30  
31  
32  
33

34 **A. Contributors:** EB, CB, SC and DT were involved in the study design. EB, MGH, FLG, AM and DT  
35 acquired and analysed the data. EB, SC, FLG and PW interpreted the data. FLG and AM drafted the  
36 manuscript. CB, SC, FLG and PW critically revised the manuscript for intellectual content. EB, CB, SC,  
37 MGH, CG, FLG, AM, DT and PW contributed to writing and interpretation of the results.  
38

39 **B. Competing interests:** None.

40  
41 **C. Funding:** This research received no specific grant from any funding agency in the public,  
42 commercial or not-for-profit sectors.  
43

44 **D. Data sharing statement:** No additional data are available.  
45  
46  
47

## 48 **REFERENCES**

- 49  
50  
51  
52 1. Walker ER, McGee RE, Druss BG. Mortality in mental disorders and global disease burden  
53 implications: a systematic review and meta-analysis. *JAMA Psychiatry*2015;72(4):334-41.  
54 2. De Hert M, Correll CU, Bobes J, et al. Physical illness in patients with severe mental  
55 disorders. I. Prevalence, impact of medications and disparities in health care. *World*  
56 *Psychiatry*2011;10: 52–77.  
57  
58  
59  
60

3. Chang C-K, Hayes RD, Perera G, et al. Life Expectancy at birth for people with serious mental illness and other major disorders from a secondary mental health care case register in London. *PLoS One*2011;6:e19590.
4. Brown S, Kim M, Mitchell C, et al. Twenty-five year mortality of a community cohort with schizophrenia. *Br J Psychiatry*2010;196:116-21.
5. Kisely S, Crowe E, Lawrence D. Cancer-Related Mortality in People With Mental Illness. *JAMA Psychiatry*2013;70(2):209–217.
6. Howard LM, Barley EA, Davies E, et al. A diagnosis of cancer in people with severe mental illness: practical and ethical issues raised. *Lancet Oncol*2010;11(8):797-804.
7. Cunningham R, Sarfati D, Stanley J, et al. Cancer survival in the context of mental illness: a national cohort study. *Gen Hosp Psychiatry*2015;37:501-506.
8. Holt RI, Mitchell AJ. Diabetes mellitus and severe mental illness: mechanisms and clinical implications. *Nat Rev Endocrinol*2015;11:79-89.
9. Mulligan K, McBain H, Lamontagne-Godwin F, et al. Barriers and enablers of type 2 diabetes self-management in people with severe mental illness. *Health Expect*2017; doi:10.1111/hex.12543.
10. World Health Organization - Department of Noncommunicable Disease Surveillance. Definition, diagnosis and classification of diabetes mellitus and its complications: Report of a WHO consultation. Part 1, Diagnosis and classification of diabetes mellitus. Geneva, Switzerland: World Health Organization 1999;WHO/NCD/NCS/99.2.
11. Royal College of Psychiatrists. Report of the Second Round of the National Audit of Schizophrenia (NAS). London: Healthcare Quality Improvement Partnership 2014.
12. Woodhead C, Cunningham R, Ashworth M, et al. Cervical and breast cancer screening uptake among women with serious mental illness: A data linkage study. *BMC Cancer*2016;16(1):819.
13. Aggarwal A, Pandurangi A, Smith W. Disparities in breast and cervical cancer screening in women with mental illness: a systematic literature review. *Am J Prev Med*2013;44(4):392–8.
14. Xiong GL, Bermudes RA, Torres SN, et al. Use of Cancer-Screening Services Among Persons with Serious Mental Illness in Sacramento County. *Psychiatr Serv*2008;59(8):929–32.
15. Mitchell AJ, Espirito I, Pereira S, et al. Breast cancer screening in women with mental illness: comparative meta-analysis of mammography uptake. *Br J Psychiatry*2014;205(6):428-435.
16. Camilloni L, Ferroni E, Cendales BJ, et al. Methods to increase participation in organised screening programs: a systematic review. *BMC public health*2013;13:464.
17. Barley EA, Borschmann RD, Walters P, et al. Interventions to encourage uptake of cancer screening for people with severe mental illness. *Cochrane Database Syst Rev*2016;Issue9.Art.No.:CD009641.
18. Clifton A, Burgess C, Clement S, et al. Influences on Uptake of Cancer Screening in Mental Health Service Users: A Qualitative Study. *BMC Health Serv Res*2016;16:257.
19. Pawson R, Greenhalgh T, Harvey G, et al. Realist review—a new method of systematic review designed for complex policy interventions. *J Health Serv Res Policy*2005;10(suppl 1),21-34.
20. Holland C, Cooper Y, Shaw R, et al. Effectiveness and uptake of screening programmes for coronary heart disease and diabetes: a realist review of design components used in interventions. *BMJ Open*2013;3:e003428.
21. Wong G, Westhorp G, Manzano A, et al. RAMESES II reporting standards for realist evaluations. *BMC Med*2016;14(1).
22. Public Health England. NHS population screening explained. Population screening programmes - Screening and quality assurance. London: Public Health England 2013;2.
23. Tosh G, Clifton AV, Xia J, et al. Physical health care monitoring for people with serious mental illness. *Cochrane Database Syst Rev*2014;Issue 1.
24. Barley E, Burgess C, Clement S, et al. Uptake of physical health screening in people with severe mental illness: a realist review. *PROSPERO*2016;CRD42016047848.



- 1
- 2
- 3 25. Ferrara M, Mungai F, Miselli M, et al. Starace F. Strategies to implement physical health
- 4 monitoring in people affected by severe mental illness: a literature review and introduction
- 5 to the Italian adaptation of the Positive Cardiometabolic Health Algorithm. *Journal of*
- 6 *Psychopathology*2015;21:269-280.
- 7 26. Hardy S, Gray R. Is the use of an invitation letter effective in prompting patients with severe
- 8 mental illness to attend a primary care physical health check? *Prim Health Care Res*
- 9 *Dev*2012;13:347-52.
- 10 27. Hardy S, Deane K, Gray R. The Northampton Physical Health and Wellbeing Project: the
- 11 views of patients with severe mental illness about their physical health check. *Ment Health*
- 12 *Fam Med*2012;9:233-40.
- 13 28. Bressington D, Mui J, Hulbert S, et al. Enhanced physical health screening for people with
- 14 severe mental illness in Hong Kong: results from a one-year prospective case series study.
- 15 *BMC Psychiatry*2014;14(57).
- 16 29. Heyding RK, Cheung AM, Mocarski EJM, et al. A Community-Based Intervention to Increase
- 17 Screening Mammography Among Disadvantaged Women at an Inner-City Drop-In Center.
- 18 *Women Health*2005;41(1):21-31.
- 19 30. Iosif A-M, Suo S, McCarron RM, et al. Understanding Preventive Health Screening Services
- 20 Use In Persons With Serious Mental Illness: How Does Integrated Behavioral Health Primary
- 21 Care Compare? *The International Journal of Psychiatry in Medicine*2015;48(4):279-298.
- 22 31. Millar HL. Development of a Health Screening Clinic. *Eur Psychiatry*2010;25,S29-S33.
- 23 32. Kioko E, Williams K, Newhouse B. Improving Metabolic Syndrome Screening on Patients on
- 24 Second Generation Antipsychotic Medication. *Arch Psychiatr Nurs*2016;30(6).
- 25 33. Castillo EG, Rosati J, Williams C, et al. Metabolic Syndrome Screening and Assertive
- 26 Community Treatment: A Quality Improvement Study. *J Am Psychiatr Nurses*
- 27 *Assoc*2015;21(4):233-243.
- 28 34. Gonzalez C, Ahammed N, Fisher R. Improving physical health monitoring for out-patients on
- 29 antipsychotic medication. *Psychiatrist*2010;34:91-94.
- 30 35. Hardy S, Hinks P, Gray R. Does training practice nurses to carry out physical health checks for
- 31 people with severe mental illness increase the level of screening for cardiovascular risk? *Int J*
- 32 *Soc Psychiatry*2014;60(3):236-242.
- 33 36. Shuel F, White J, Jones M. et al. Using the serious mental illness health improvement profile
- 34 [HIP] to identify physical problems in a cohort of community patients: A pragmatic case
- 35 series evaluation. *Int J Nurs Stud*2010;47:136-145.
- 36 37. Vasudev K, Thakkar PB, Mitcheson N. Physical health of patients with severe mental illness:
- 37 an intervention on medium secure forensic unit. *Int J Health Care Qual Assur*2012;25(4):363-
- 38 70.
- 39 38. Wiechers IR, Stoklosa J, Henderson DC. Impact of a Metabolic Screening Bundle on Rates of
- 40 Screening for Metabolic Syndrome in a Psychiatry Resident Outpatient Clinic. *Acad*
- 41 *Psychiatry*2012;36:118-121.
- 42 39. Yeomans D, Dale K, Beedle K. Systematic computerised cardiovascular health screening for
- 43 people with severe mental illness. *Psychiatr Bull*2014;38(6).
- 44 40. Abdallah N, Conn R, Latif M, et al. Improving physical health monitoring for patients with
- 45 chronic mental health problems who receive antipsychotic medications. *BMJ Qual Improv*
- 46 *Rep*2016;5(1).
- 47 41. Latoo J, Omodunbi O, Hindley D, et al. Physical health of people with severe mental illness:
- 48 Don't just screen...intervene! *British Journal of Medical Practitioners*2015;8(3):a821.
- 49 42. Vasudev K, Martindale BV. Physical healthcare of people with severe mental illness:
- 50 everybody's business! *Ment Health Fam Med*2010;7(2):115-122.
- 51 43. Thompson A, Hetrick SE, Ivarez-Jiménez M, et al. Targeted intervention to improve
- 52 monitoring of antipsychotic-induced weight gain and metabolic disturbance in first episode
- 53 psychosis. *Aust N Z J Psychiatry*2011;45:740-748.
- 54
- 55
- 56
- 57
- 58
- 59
- 60

- 1
- 2
- 3
- 4 44. Druss BG, von Esenwein SA, Compton MT, et al. A Randomized Trial of Medical Care
- 5 Management for Community Mental Health Settings: The Primary Care Access, Referral, and
- 6 Evaluation (PCARE) Study. *Am J Psychiatry*2010;167:151–159.
- 7
- 8 45. Osborn DP, Irwin N, Wright CA, et al. Impact of a nurse-led intervention to improve
- 9 screening for cardiovascular risk factors in people with severe mental illnesses. Phase-two
- 10 cluster randomised feasibility trial of community mental health teams. *BMC Health Serv*
- 11 *Res*2010;10(61).
- 12
- 13 46. Rosenbaum S, Nijjar S, Watkins A, et al. Nurse-assessed metabolic monitoring: A file audit of
- 14 risk factor prevalence and impact of an intervention to enhance measurement of waist
- 15 circumference. *Int J Ment Health Nurs*2014;23:252–256.
- 16
- 17 47. DelMonte MT, Bostwick JR, Bess JD, et al. Evaluation of a computer-based intervention to
- 18 enhance metabolic monitoring in psychiatry inpatients treated with second-generation
- 19 antipsychotics. *J Clin Pharm Ther*2012;37:668–673.
- 20
- 21 48. Wilson E, Randall C, Patterson S, et al. Monitoring and management of metabolic
- 22 abnormalities: mixed-method evaluation of a successful intervention. *Australas*
- 23 *Psychiatry*2014;22(3):248–253.
- 24
- 25 49. Higgins JP, Altman DG, Gøtzsche PC, et al. The Cochrane Collaboration’s tool for assessing
- 26 risk of bias in randomized trials. *BMJ*2011;343:d5928.
- 27
- 28 50. von Elm E, Altman DG, Egger M, et al. The Strengthening the Reporting of Observational
- 29 Studies in Epidemiology (STROBE) statement: guidelines for reporting observational
- 30 studies. *Ann Intern Med*2007;147:573–577.
- 31
- 32 51. Armstrong R, Campbell M, Craig P, et al. Reporting guidelines for population health and
- 33 policy interventions: TIDieR-PHP. *Lancet*2015;386(Supp 2),S19.
- 34
- 35 52. Anderson R. New MRC Guidance on Evaluating Complex Interventions. *BMJ*2008;337:7676.
- 36
- 37
- 38
- 39
- 40
- 41
- 42
- 43
- 44
- 45
- 46
- 47
- 48
- 49
- 50
- 51
- 52
- 53
- 54
- 55
- 56
- 57
- 58
- 59
- 60

1  
2  
3  
4  
5  
6  
7  
8  
9  
10  
11  
12  
13  
14  
15  
16  
17  
18  
19  
20  
21  
22  
23  
24  
25  
26  
27  
28  
29  
30  
31  
32  
33  
34  
35  
36  
37  
38  
39  
40  
41  
42  
43  
44  
45  
46  
47  
48  
49  
50  
51  
52  
53  
54  
55  
56  
57  
58  
59  
60

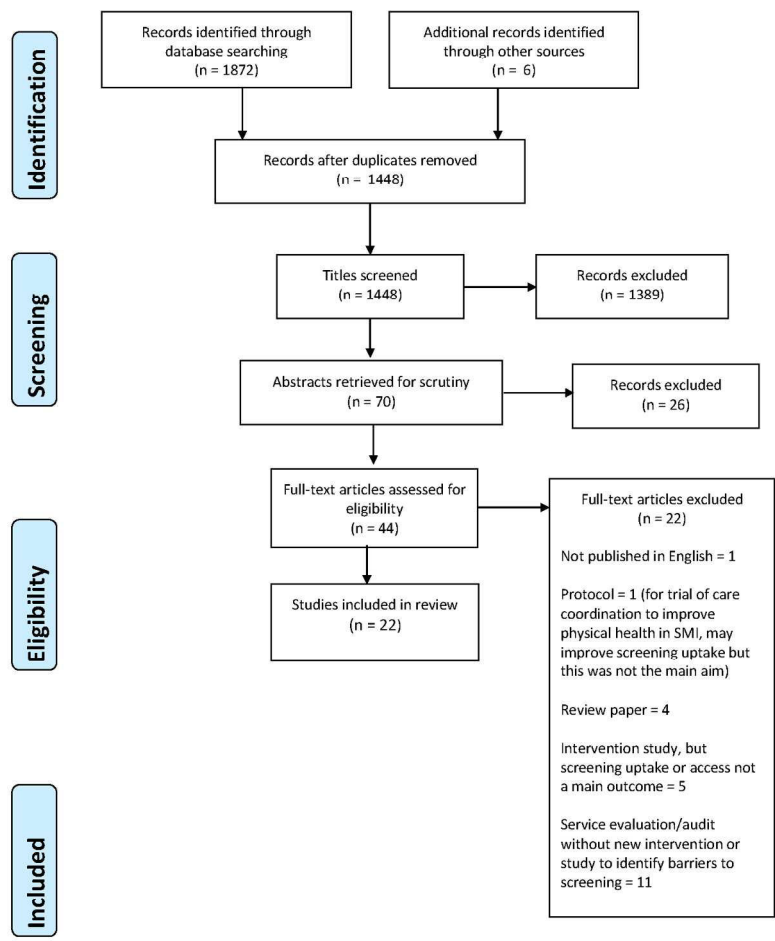

Figure 1. PRISMA Flow Diagram of intervention studies included and excluded from this review

210x297mm (199 x 200 DPI)

## Appendix

### 1. Search terms used in search strategy

The following terms will be used in all data sources: (cardiovascular OR vascular OR CVD OR 'chronic heart disease' OR 'coronary heart disease' OR CHD OR diabetes OR metabolic OR aneurysm) OR cancer OR neoplasm OR carcinoma OR maligna\* OR \*tumour OR tumor OR breast OR mammogra\* OR bowel OR cervical OR pap\*) OR (dental OR dentist OR tooth OR teeth) OR (eye OR retinopathy) AND ('mass screening' OR surveillance\*) OR "Screening Test" OR ((cholesterol OR fecal OR faecal OR blood OR HIV OR sig-moid OR tuberculosis) AND test\*) OR "health check\*" AND (letter OR mail\* OR phone OR telephone OR 'reminder system\*' OR 'videotape recording\*' OR 'audiotape recording\*' OR questionnaire\* OR strateg\* OR alert\* OR hotline OR community OR media) AND (intervention\* OR goal OR 'behav\* change' OR 'implementation intention\*' OR plans OR planned OR planning OR plan OR educat\* OR campaign\* OR barriers OR intention\* OR 'behav\* outcome' OR outcome OR 'lifestyle change' OR longitudinal OR 'follow up' OR motivation\*) AND (satisf\* OR dropout\* OR 'drop out' OR attrition OR uptak\* OR adher\* OR compliance OR complie\* OR comply\* OR 'patient acceptance of health care' OR encourag\* OR improve\* OR improving OR increas\* OR promot\* OR particip\* OR nonattend\* OR 'non attend' OR accept\* OR attend\* OR attitud\* OR utilisation OR utilization OR refus\* OR respond\* OR respons\* OR reluctan\* OR nonrespon\* OR 'non respon\*' OR incidence OR prevalence OR prevalence OR satisfaction OR cooperat\* OR 'co operat\*') AND ('severe mental illness' OR 'mental illness' OR schizophrenia OR catatonic OR paranoid OR disorganized OR disorganised OR bipolar OR manic OR psychosis OR psychotic OR psychiatric OR schizophrenic OR SMI)

1  
2  
3  
4  
5  
6  
7  
8  
9  
10  
11  
12  
13  
14  
15  
16  
17  
18  
19  
20  
21  
22  
23  
24  
25  
26  
27  
28  
29  
30  
31  
32  
33  
34  
35  
36  
37  
38  
39  
40  
41  
42  
43  
44  
45  
46  
47

**Table 1: Tools to facilitate screening**

| Study                           | Year | Country   | Population Studied                            | Intervention                                                                                                          | Method(s) applied                                                                                                                                  | Results                                                                                                                                                                                                                                                                                                                                                                                                                                                                                                                                                                                                                                                     | Main study weaknesses                                    |
|---------------------------------|------|-----------|-----------------------------------------------|-----------------------------------------------------------------------------------------------------------------------|----------------------------------------------------------------------------------------------------------------------------------------------------|-------------------------------------------------------------------------------------------------------------------------------------------------------------------------------------------------------------------------------------------------------------------------------------------------------------------------------------------------------------------------------------------------------------------------------------------------------------------------------------------------------------------------------------------------------------------------------------------------------------------------------------------------------------|----------------------------------------------------------|
| Bressington et al <sup>28</sup> | 2014 | Hong Kong | 148 community based psychiatric service users | Training for community psychiatric nurses on how to use the HIP and how to conduct the required physical examinations | Consecutive prospective case series design<br><br>Pre-post evaluation of structured questionnaire as a screening tool for physical health problems | Significant improvement in self-reported levels of exercise and reduced prescriptions for mean waist circumference increased at follow-up but may be due to measurement error (87.32 to 89.90)<br><br>Lack of deterioration in most areas of cardiovascular risk (BMI mean: 25.79 to 25.66, weight mean: 66.76 to 66.49)<br><br>Reduction in medicines prescribed for physical health problems: diabetes medication (p = 0.04) and prescriptions for hypertension reduced at follow-up from 21% to 14% of patients<br><br>General improvements in health behaviours over the 12 month period: 7% increase in number of patients eating sufficient fruit and | No randomization, no control group<br><br>Selection bias |

|                              |      |     |                                                                                                                       |                                                                                                                                                   |                                                                                                                     |                                                                                                                                                                                                                                                                                                          |                                                                                                                                         |
|------------------------------|------|-----|-----------------------------------------------------------------------------------------------------------------------|---------------------------------------------------------------------------------------------------------------------------------------------------|---------------------------------------------------------------------------------------------------------------------|----------------------------------------------------------------------------------------------------------------------------------------------------------------------------------------------------------------------------------------------------------------------------------------------------------|-----------------------------------------------------------------------------------------------------------------------------------------|
|                              |      |     |                                                                                                                       |                                                                                                                                                   |                                                                                                                     | vegetables, but only exercise improved to a statistically significant level ( $p = 0.02$ )                                                                                                                                                                                                               |                                                                                                                                         |
| Castillo et al <sup>33</sup> | 2015 | USA | 141 community based assertive outreach service users                                                                  | Systematic screening protocol for MS and educational sessions for staff and service users                                                         | Quality Improvement                                                                                                 | 75 (53%) participants met criteria for MS<br>Five of these diagnoses came from use of adapted diagnostic criteria using random glucose measurements<br>Of the 66 participants who did not have MS, only 9 had no metabolic risk factors<br>34 met 2 criteria and the remaining 23 met 1 criterion for MS | No randomization, no control group                                                                                                      |
| Delmonte et al <sup>47</sup> | 2012 | USA | Service users on a general psychiatric inpatient unit – 171 at pre alert and 157 post alert                           | Use of computerized electronic patient alerts to enhance metabolic monitoring (fasting blood glucose, lipid)                                      | Retrospective chart review of notes and tests ordered to assess for MS<br>Pre-post study design                     | Significant difference in availability of metabolic monitoring data post intervention: 12.9% to 47.8% in number of service users with both fasting glucose level & fasting lipid panel                                                                                                                   | No randomization, no control group<br>Open to time bias                                                                                 |
| Gonzalez et al <sup>34</sup> | 2010 | UK  | Male and female community based service users taking regular antipsychotic medication<br>Inner city London population | Local adaptation of clinical guidelines<br>Implementation of monitoring tool: A4 page filed in the patients' records, both as a prompt to doctors | Retrospective audit of patients' clinical records for physical health monitoring<br><br>Systematic randomization by | Post intervention: significant improvement in all tests (glucose: 24.6% to 72.6%, lipids: 7.1% to 52.8%, liver function: 38.9% to 79.2%) except HbA1c                                                                                                                                                    | No randomization, no control group<br>Did not include other measure for detection of MS and did not include ECG<br>Limited time between |

1  
2  
3  
4  
5  
6  
7  
8  
9  
10  
11  
12  
13  
14  
15  
16  
17  
18  
19  
20  
21  
22  
23  
24  
25  
26  
27  
28  
29  
30  
31  
32  
33  
34  
35  
36  
37  
38  
39  
40  
41  
42  
43  
44  
45  
46  
47

|                           |      |     |                                                                                                             |                                                                                                                                                                                      |                                                                                                                                                                     |                                                                                                                                                                                                                                                                                   |                                                                                                                                                                                                                                                                                                                                                                 |
|---------------------------|------|-----|-------------------------------------------------------------------------------------------------------------|--------------------------------------------------------------------------------------------------------------------------------------------------------------------------------------|---------------------------------------------------------------------------------------------------------------------------------------------------------------------|-----------------------------------------------------------------------------------------------------------------------------------------------------------------------------------------------------------------------------------------------------------------------------------|-----------------------------------------------------------------------------------------------------------------------------------------------------------------------------------------------------------------------------------------------------------------------------------------------------------------------------------------------------------------|
|                           |      |     | First audit N=126<br>Second audit N=106<br>No significant difference in demographic details of both samples | regarding their patients' need for the physical monitoring and as an instrument to facilitate later data collection                                                                  | selecting every 4 <sup>th</sup> file in alphabetical order until 25% of caseload was selected                                                                       | (3.2 to 5.7%) and Prolactin (0.8% to 0)<br>Implementation of the monitoring tool achieved in 48% of re-audit sample                                                                                                                                                               | audits to allow embedding of the intervention<br>Other factors may have resulted in improvements seen due to increased awareness within the service due to local policy and national guidelines or other potential factors                                                                                                                                      |
| Hardy et al <sup>35</sup> | 2014 | UK  | 400 community based service users with SMI                                                                  | Two-hour training for practice nurses to increase level of screening for cardiovascular disease (CVD) risk factors with lifestyle counselling (health check includes seven elements) | Repeat audit to monitor how well primary care practitioners are screening people with SMI for CVD following training                                                | Training practice nurses on CVD prevention increased number of service users receiving wide ranging health check<br>Pre-training: <i>n</i> = 33, 8%<br>Post-training: <i>n</i> = 60, 15%, <i>p</i> = .01<br>Increase in number of service users receiving lifestyle interventions | No randomization, no control group<br>Unclear why other 26 primary care centres did not participate<br>Did not look at any other factor (e.g. other training, professional development, targets by the organisation) which could have influenced staff<br>Possible Hawthorne effect and no exploration of whether increased screening improves patient outcomes |
| Kioko et al <sup>32</sup> | 2016 | USA | 100 notes of community mental health service users                                                          | Recommended MS monitoring and screening tool to improve identification of patients at risk of MS                                                                                     | Pre-post intervention design to evaluate the effectiveness of using a recommended MS monitoring and screening tool to improve identification of MS risk for service | Percentage of laboratory tests ordered were 62% post-intervention compared to 22% pre-intervention                                                                                                                                                                                | No randomization, no control group<br>Difficulty obtaining waist circumference - parameter frequently omitted<br>Lack of agreement over who is responsible for ordering labs and following                                                                                                                                                                      |

|                             |      |    |                                                                                                                |                                                                                                  |                                                                                     |                                                                                                                                                                                                                                                                                                                                                                                                                                                        |                                                                                                                                                |
|-----------------------------|------|----|----------------------------------------------------------------------------------------------------------------|--------------------------------------------------------------------------------------------------|-------------------------------------------------------------------------------------|--------------------------------------------------------------------------------------------------------------------------------------------------------------------------------------------------------------------------------------------------------------------------------------------------------------------------------------------------------------------------------------------------------------------------------------------------------|------------------------------------------------------------------------------------------------------------------------------------------------|
|                             |      |    |                                                                                                                |                                                                                                  | users                                                                               |                                                                                                                                                                                                                                                                                                                                                                                                                                                        | up results<br>Small sample size - difficult to generalize results                                                                              |
| Shuel et al <sup>36</sup>   | 2010 | UK | 31 community based psychiatric service users<br>9 Mental Health Nurses<br>4 Psychiatrists<br>12 GPs            | Paper sheet screening instrument (HIP)                                                           | Retrospective audit of patient and clinician views using semi-structured interviews | Thirty-one patients participated in Audit<br>Mean number of parameters per patient requiring intervention was 6.1 and a total of 189 physical health issues were identified<br>At least one physical health issue was identified per patient<br>High prevalence of obesity, poor diet (41% of patients) and lack of exercise<br>14 referrals for potentially serious conditions including raised glucose and lipids, hypertension and cardiac problems | No randomization, no control group<br>One-year FU assessment planned to assess changes in modifiable factors identified by the HIP             |
| Vasudev et al <sup>37</sup> | 2012 | UK | 23 male inpatients on a medium secure forensic psychiatric rehab unit diagnosed with SMI and on antipsychotics | Introduction of a physical health monitoring sheet by the Trust to prompt staff to do the checks | Pre-post audit of physical health monitoring (twelve months apart)                  | At re-audit 100% of service users had up to date records on the physical health monitoring sheet<br>At follow-up increased number of service users prescribed hypolipidaemic agents                                                                                                                                                                                                                                                                    | No randomization, no control group<br>Small male-only sample<br>Type of ward and environment could influence patient engagement and motivation |



1  
2  
3  
4  
5  
6  
7  
8  
9  
10  
11  
12  
13  
14  
15  
16  
17  
18  
19  
20  
21  
22  
23  
24  
25  
26  
27  
28  
29  
30  
31  
32  
33  
34  
35  
36  
37  
38  
39  
40  
41  
42  
43  
44  
45  
46  
47

|                              |      |     |                                                                     |                                                                                                                                                          |                                                                                                        |                                                                                                                                                                                                                                       |                                                                                                                                                                                                                                                                                                                                                                                 |
|------------------------------|------|-----|---------------------------------------------------------------------|----------------------------------------------------------------------------------------------------------------------------------------------------------|--------------------------------------------------------------------------------------------------------|---------------------------------------------------------------------------------------------------------------------------------------------------------------------------------------------------------------------------------------|---------------------------------------------------------------------------------------------------------------------------------------------------------------------------------------------------------------------------------------------------------------------------------------------------------------------------------------------------------------------------------|
|                              |      |     |                                                                     |                                                                                                                                                          |                                                                                                        | Significant reduction in CVD risk at follow up                                                                                                                                                                                        |                                                                                                                                                                                                                                                                                                                                                                                 |
| Wiechers et al <sup>38</sup> | 2012 | USA | 206 adult service users of a psychiatric resident outpatient clinic | Metabolic Screening Bundle template<br>Three one-hour education sessions conducted to review antipsychotic medication-associated metabolic abnormalities | Audits of the EMR completed at baseline and each quarter for the following year<br>Quality Improvement | Rates component parts of the Metabolic Screening Bundle in the preceding 12 months increased from baseline audit through the Quarter 4 audit: BMI 5% to 44%; BP 4% to 39%; Fasting glucose 15% to 55%; Fasting lipid panel 14% to 55% | No randomization, no control group<br>Chart audit unable to capture undocumented results/results documented other than psychiatry notes that may have been reviewed by the resident but not remarked on in the progress-note<br>Unclear whether gains made with intervention and cohort of residents can be sustained without a dedicated group of residents championing change |
| Yeomans et al <sup>39</sup>  | 2014 | UK  | 335 service users on the primary care SMI register                  | GP practices received 30-minute staff training on how to use a computerized physical screening template designed for annual health checks                | Retrospective evaluation of computerized template designed for annual physical health check            | 23% service users with a computerized template review had data rich QRisk2 compared QRisk2 scores above 20% seen in 3.9% of template based reviews<br>Use of template increased detection risk for CVD                                | No randomization, no control group<br>Method dependent on accurate record keeping and clinician behaviour<br>No record of unrecorded activity taking place which would contribute to annual patient review<br>GPs selected patients for review: possible bias acknowledged but considered unlikely<br>Quality and Outcomes                                                      |

1  
2  
3  
4  
5  
6  
7  
8  
9  
10  
11  
12  
13  
14  
15  
16  
17  
18  
19  
20  
21  
22  
23  
24  
25  
26  
27  
28  
29  
30  
31  
32  
33  
34  
35  
36  
37  
38  
39  
40  
41  
42  
43  
44  
45  
46  
47

|  |  |  |  |  |  |  |  |                                                                             |
|--|--|--|--|--|--|--|--|-----------------------------------------------------------------------------|
|  |  |  |  |  |  |  |  | Framework incentive for annual health checks removed and replaced by CQUIN. |
|--|--|--|--|--|--|--|--|-----------------------------------------------------------------------------|

For peer review only

1  
2  
3  
4  
5  
6  
7  
8  
9  
10  
11  
12  
13  
14  
15  
16  
17  
18  
19  
20  
21  
22  
23  
24  
25  
26  
27  
28  
29  
30  
31  
32  
33  
34  
35  
36  
37  
38  
39  
40  
41  
42  
43  
44  
45  
46  
47

**Table 2: Studies of health service delivery changes**

| First Author                 | Year | Country | Population Studied                                       | Intervention                                                                                                                  | Method(s) applied        | Results                                                                                                                                                                                                                                                                                                                               | Main study weaknesses                                                                                                                                                                          |
|------------------------------|------|---------|----------------------------------------------------------|-------------------------------------------------------------------------------------------------------------------------------|--------------------------|---------------------------------------------------------------------------------------------------------------------------------------------------------------------------------------------------------------------------------------------------------------------------------------------------------------------------------------|------------------------------------------------------------------------------------------------------------------------------------------------------------------------------------------------|
| Abdallah et al <sup>40</sup> | 2016 | UK      | 95 service users with schizophrenia living in care homes | Patient education and education of care home staff                                                                            | Quality Improvement      | Improvement in culture within care home where staff and service users actively participated in physical health monitoring<br>Blood pressure and weight measured in 68% of patients compared to 10% and 0 at baseline<br>55% of patients had pulse measured compared to 0 at baseline<br>68% had bloods done compared to 0 at baseline | No randomization, no control group<br><br>Small sample, difficult to determine results as in later PDSA cycles the interventions did not target only the patient group included in the results |
| Druss et al <sup>44</sup>    | 2010 | USA     | 407 service users with SMI under care of community teams | Participants with SMI at an urban community mental health centre were randomly assigned to either the medical care management | Randomized Control Trial | 12-month follow-up evaluation: intervention group received average 58.7% of recommended preventive                                                                                                                                                                                                                                    | Low risk of bias (Performance bias as control group - treatment as usual - not blinded)<br><br>Broad entry criteria                                                                            |

1  
2  
3  
4  
5  
6  
7  
8  
9  
10  
11  
12  
13  
14  
15  
16  
17  
18  
19  
20  
21  
22  
23  
24  
25  
26  
27  
28  
29  
30  
31  
32  
33  
34  
35  
36  
37  
38  
39  
40  
41  
42  
43  
44  
45  
46  
47

|  |  |  |  |                                                                                                                                                                                                                                                                           |  |                                                                                                                                                                                                                                                                                                                                                                                                                                                                                                   |                                                                                                                                                                                                                                                               |
|--|--|--|--|---------------------------------------------------------------------------------------------------------------------------------------------------------------------------------------------------------------------------------------------------------------------------|--|---------------------------------------------------------------------------------------------------------------------------------------------------------------------------------------------------------------------------------------------------------------------------------------------------------------------------------------------------------------------------------------------------------------------------------------------------------------------------------------------------|---------------------------------------------------------------------------------------------------------------------------------------------------------------------------------------------------------------------------------------------------------------|
|  |  |  |  | <p>intervention or usual care</p> <p>For individuals in the intervention group, care managers provided communication and advocacy with medical providers, health education, and support in overcoming system-level fragmentation and barriers to primary medical care</p> |  | <p>services compared with 21.8% in usual care</p> <p>Significantly higher proportion of evidence-based services for cardio-metabolic conditions (34.9% versus 27.7%)</p> <p>Higher likelihood to have primary care provider (71.2% versus 51.9%)</p> <p>Intervention group showed significant improvement on SF-36 mental component summary (8.0% [versus a 1.1% decline in the usual care group])</p> <p>Scores on Framingham Cardiovascular Risk Index significantly better in intervention</p> | <p>limited the statistical power to examine outcomes for individual medical conditions</p> <p>Study was conducted in a single site so replication would be needed to fully assess generalizability to different types of community mental health settings</p> |
|--|--|--|--|---------------------------------------------------------------------------------------------------------------------------------------------------------------------------------------------------------------------------------------------------------------------------|--|---------------------------------------------------------------------------------------------------------------------------------------------------------------------------------------------------------------------------------------------------------------------------------------------------------------------------------------------------------------------------------------------------------------------------------------------------------------------------------------------------|---------------------------------------------------------------------------------------------------------------------------------------------------------------------------------------------------------------------------------------------------------------|

1  
2  
3  
4  
5  
6  
7  
8  
9  
10  
11  
12  
13  
14  
15  
16  
17  
18  
19  
20  
21  
22  
23  
24  
25  
26  
27  
28  
29  
30  
31  
32  
33  
34  
35  
36  
37  
38  
39  
40  
41  
42  
43  
44  
45  
46  
47

|                             |      |        |                                                                                                                 |                                                                                                                                                                                                                                                                                                         |                                                                                   |                                                                                                                                                                               |                                                                                                                                                         |  |
|-----------------------------|------|--------|-----------------------------------------------------------------------------------------------------------------|---------------------------------------------------------------------------------------------------------------------------------------------------------------------------------------------------------------------------------------------------------------------------------------------------------|-----------------------------------------------------------------------------------|-------------------------------------------------------------------------------------------------------------------------------------------------------------------------------|---------------------------------------------------------------------------------------------------------------------------------------------------------|--|
|                             |      |        |                                                                                                                 |                                                                                                                                                                                                                                                                                                         |                                                                                   |                                                                                                                                                                               | group (6.9%) than usual care group (9.8%)                                                                                                               |  |
| Hardy & Gray <sup>26</sup>  | 2012 | UK     | 92 community service users with severe and enduring mental illness<br>338 service users with diabetes           | Retrospective comparison of response rate of patients with SMI and diabetes to an invitation appointment letter to attend a primary care health check<br>Patients with SMI sent an appointment at a predetermined time and date.<br>Annual health check for patients with SMI followed the HIP guidance | Retrospective audit                                                               | 66% service users with SMI attended appointment<br>81% service users with diabetes attended appointment<br>Service users with diabetes 2.2 more likely to attend health check | No randomization, no control group<br><br>Unclear if sample reflects whole population of SMI (or diabetes)                                              |  |
| Heyding et al <sup>29</sup> | 2005 | Canada | Disadvantaged women aged 50-70 who attended inner-city drop-in centre (N = 158 in 1995-2001 and N = 89 in 2002) | Drop-in centre and nearby hospital in Toronto initiated collaborative breast cancer screening project in which staff of drop-in centre accompanied small groups of women for mammography visits at weekly pre-arranged time                                                                             | Pre-post audit<br>Comparison between screening before and after intervention year | Increase from average of 4.7% women receiving a mammography to 29.2%                                                                                                          | No randomization, no control group<br><br>Observational rather than experimental design<br><br>Limited control over extraneous variables<br><br>Audited |  |

|                           |      |    |                                                                                                                           |                                                                                                                                                                                    |                                                                                              |                                                                                                                                                                                                                                                |                                                                                                                                                                                   |
|---------------------------|------|----|---------------------------------------------------------------------------------------------------------------------------|------------------------------------------------------------------------------------------------------------------------------------------------------------------------------------|----------------------------------------------------------------------------------------------|------------------------------------------------------------------------------------------------------------------------------------------------------------------------------------------------------------------------------------------------|-----------------------------------------------------------------------------------------------------------------------------------------------------------------------------------|
|                           |      |    |                                                                                                                           |                                                                                                                                                                                    |                                                                                              |                                                                                                                                                                                                                                                | documentation may have been inaccurate or incomplete                                                                                                                              |
| Latoo et al <sup>41</sup> | 2015 | UK | 52-55 service users receiving antipsychotics in Early intervention in Psychosis service                                   | Advancing Quality Alliance design to examine six physical health parameters: weight, height, BMI, BP, blood glucose and serum lipids                                               | Retrospective review of clinical records following improvement in physical health monitoring | Screening and monitoring of six parameters:<br>At 4 weeks 29 patients recorded screening, 19 (66%) of which had six types of screening<br>At 24 months, out of 16 patients who had their screening recorded, 15 (95%) had 6 types of screening | No control group<br><br>No randomized design to test new screening and assessment method                                                                                          |
| Millar <sup>31</sup>      | 2010 | UK | 152 community based service users<br>100 inpatient and community service users<br>all prescribed antipsychotic medication | Dundee Health Screening Clinic developed to address needs of this population by monitoring physical health and providing follow-up to ensure that patients received necessary care | Mixed Methods: pilot study, audit and satisfaction survey                                    | Heavy burden of physical health problems identified in Phase One (66% obesity, 60% elevated cholesterol, 32% hypertension)<br>Of the first 100 patients audited: 33% had MS                                                                    | No randomization, no control group<br><br>Generalizability may be limited due to differences in availability of resources in different areas, though no additional resources were |

1  
2  
3  
4  
5  
6  
7  
8  
9  
10  
11  
12  
13  
14  
15  
16  
17  
18  
19  
20  
21  
22  
23  
24  
25  
26  
27  
28  
29  
30  
31  
32  
33  
34  
35  
36  
37  
38  
39  
40  
41  
42  
43  
44  
45  
46  
47

|                               |      |           |                                                                    |                                                                                                                                        |                                                                     |                                                                                                                                                                                                                                                                                                                                                                   |                                                                                                                                                                                                                                                                                                    |
|-------------------------------|------|-----------|--------------------------------------------------------------------|----------------------------------------------------------------------------------------------------------------------------------------|---------------------------------------------------------------------|-------------------------------------------------------------------------------------------------------------------------------------------------------------------------------------------------------------------------------------------------------------------------------------------------------------------------------------------------------------------|----------------------------------------------------------------------------------------------------------------------------------------------------------------------------------------------------------------------------------------------------------------------------------------------------|
|                               |      |           |                                                                    |                                                                                                                                        |                                                                     | 99% agreed health screening important<br>65% reported lifestyle change                                                                                                                                                                                                                                                                                            | used to develop the intervention                                                                                                                                                                                                                                                                   |
| Osborn et al <sup>45</sup>    | 2010 | UK        | 121 service users under the care of a community mental health team | Nurse-led screening programme and education pack regarding appropriate screening for cardiovascular disease (CVD) related risk factors | Cluster Randomized Feasibility trial                                | After the trial CVD screening increased in both arms but participants from intervention arm were significantly more likely to have received screening for blood pressure (96% vs 68%), cholesterol (66.7% vs 26.9%), glucose (66.7% vs 36.5%), BMI (92.5% vs 65.2%), smoking status (88.2% vs 57.8%) and have 10 year CVD risk score calculated (38.2% vs 10.9%). | Low risk of bias<br><br>Response rate in the recruitment for outcome data was main limitation<br><br>Recruitment was time limited because of funding<br><br>Participants who provided outcome data may have been a biased sample of CMHT patients therefore generalization of results is difficult |
| Rosenbaum et al <sup>46</sup> | 2014 | Australia | 60 service users on inpatient psychiatric ward                     | Educational training including waist circumference (WC) measurement<br>Change in                                                       | Pre-post audit of the frequency of WC<br>Documentation before/after | Improved measurement by nurses of WC from 0-58%<br>WC was higher in                                                                                                                                                                                                                                                                                               | No randomization, no control group<br><br>Not all staff were able to receive                                                                                                                                                                                                                       |

|                                    |      |           |                                                                                            |                                                                                                                                                            |                                                   |                                                                                                                                                                                                                                                                                                  |                                                                            |
|------------------------------------|------|-----------|--------------------------------------------------------------------------------------------|------------------------------------------------------------------------------------------------------------------------------------------------------------|---------------------------------------------------|--------------------------------------------------------------------------------------------------------------------------------------------------------------------------------------------------------------------------------------------------------------------------------------------------|----------------------------------------------------------------------------|
|                                    |      |           | 25 mental health nurses                                                                    | assessment-form design                                                                                                                                     | intervention                                      | these patients than general population 19% had BMI within a healthy range, 37% smoked, 31% were hypertensive                                                                                                                                                                                     | intervention                                                               |
| Thompson et al <sup>43</sup>       | 2011 | Australia | 118 files of service users under the care of Early Psychosis and Prevention Centre service | Educational intervention for staff<br>Development of local guidelines, provision of monitoring equipment, prompts in patients' records and regular reviews | Pre-post audit of completion of metabolic screens | Improvements in screening and monitoring of four metabolic indices at the post-intervention time point<br><br>Individual rates were higher for screening (74.4% to 84.9%) than monitoring outcomes (24.4% to 41.6%)<br>Rates ranged between 17.4% for blood lipids to 34.9% for obesity measures | No randomization, no control group<br><br>Naturalistic setting             |
| Vasudev & Martindale <sup>42</sup> | 2010 | UK        | 66-72 service users aged 14 to 35 under care of Early Intervention                         | In-house training for members of the Early Intervention Service Interventions                                                                              | Pre-post audit                                    | Number of patients having at least one annual physical health check increased                                                                                                                                                                                                                    | No randomization, no control group<br><br>Focuses on Early Intervention so |



|                            |      |           |                                                     |                                                                                                                                                                                                                                                                                                                               |                                      |                                                                                                                                                                    |                                                                                                                                                                 |
|----------------------------|------|-----------|-----------------------------------------------------|-------------------------------------------------------------------------------------------------------------------------------------------------------------------------------------------------------------------------------------------------------------------------------------------------------------------------------|--------------------------------------|--------------------------------------------------------------------------------------------------------------------------------------------------------------------|-----------------------------------------------------------------------------------------------------------------------------------------------------------------|
|                            |      |           | service                                             | between audit – in-house training, physical health mandatory component on care plan review, joint responsibility for communicating with GP, referral information updated to include physical health, liaison with wider MDT                                                                                                   |                                      | from 20% to 58%<br>Patients who had undergone physical health check at re-audit, a record of some/all of the checks was available in the notes for 75% of patients | many people do not have a formal diagnosis of SMI e.g. schizophrenia<br><br>Only 7 months between audits, therefore very short time to measure long term impact |
| Wilson et al <sup>48</sup> | 2014 | Australia | 107 to 232 service users attending clozapine clinic | Six education sessions covering test interpretation, MS, diabetes management, obesity, smoking cessation and lifestyle interventions<br>“Let’s Get Physical” initiative – designation of two months annually as physical health months (PHM) during which time revised service protocol required metabolic monitoring for all | Quality Improvement<br>Mixed Methods | Completion rates of metabolic monitoring:<br>69.2% at first month and 65.1% at second month<br>Limited evidence of actions post results                            | No randomization, no control group<br><br>Limited possibility of generalization due to single site and very specific population                                 |

|                           |      |     |                                                                  |                                                                                                                                                                          |                                                                                         |                                                                                                                                                                                                                                                                                                                                                |                                                                                                                            |
|---------------------------|------|-----|------------------------------------------------------------------|--------------------------------------------------------------------------------------------------------------------------------------------------------------------------|-----------------------------------------------------------------------------------------|------------------------------------------------------------------------------------------------------------------------------------------------------------------------------------------------------------------------------------------------------------------------------------------------------------------------------------------------|----------------------------------------------------------------------------------------------------------------------------|
|                           |      |     |                                                                  | eligible patients<br>Service protocols<br>were revised to<br>require metabolic<br>monitoring of all<br>eligible patients<br>during PHMs                                  |                                                                                         |                                                                                                                                                                                                                                                                                                                                                |                                                                                                                            |
| Xiong et al <sup>14</sup> | 2015 | USA | Four mental<br>health clinics<br>providing<br>outpatient<br>care | Comparison of<br>preventive services<br>used in an integrated<br>behavioural health<br>primary care clinic<br>with two existing<br>community mental<br>health programmes | Cross-sectional<br>study<br>comparing use<br>of preventative<br>services<br>350 surveys | Patients on<br>antipsychotic<br>medication<br>were less likely to<br>use preventive<br>non-cancer<br>services than<br>their comparison<br>group (p = 0.04)<br><br>Integrated<br>Behavioral Health<br>Primary Care unit<br>associated with<br>higher overall<br>service utilization<br>than a<br>community<br>mental health<br>team (p < 0.001) | No randomization,<br>no control group<br><br>Unable to adjust<br>for confounding<br>factors such as<br>severity of illness |

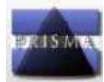

# PRISMA 2009 Checklist

| Section/topic                      | #  | Checklist item                                                                                                                                                                                                                                                                                              | Reported on page # |
|------------------------------------|----|-------------------------------------------------------------------------------------------------------------------------------------------------------------------------------------------------------------------------------------------------------------------------------------------------------------|--------------------|
| <b>TITLE</b>                       |    |                                                                                                                                                                                                                                                                                                             |                    |
| Title                              | 1  | Identify the report as a systematic review, meta-analysis, or both.                                                                                                                                                                                                                                         | 1                  |
| <b>ABSTRACT</b>                    |    |                                                                                                                                                                                                                                                                                                             |                    |
| Structured summary                 | 2  | Provide a structured summary including, as applicable: background; objectives; data sources; study eligibility criteria, participants, and interventions; study appraisal and synthesis methods; results; limitations; conclusions and implications of key findings; systematic review registration number. | 2                  |
| <b>INTRODUCTION</b>                |    |                                                                                                                                                                                                                                                                                                             |                    |
| Rationale                          | 3  | Describe the rationale for the review in the context of what is already known.                                                                                                                                                                                                                              | 3-4                |
| Objectives                         | 4  | Provide an explicit statement of questions being addressed with reference to participants, interventions, comparisons, outcomes, and study design (PICOS).                                                                                                                                                  | 4                  |
| <b>METHODS</b>                     |    |                                                                                                                                                                                                                                                                                                             |                    |
| Protocol and registration          | 5  | Indicate if a review protocol exists, if and where it can be accessed (e.g., Web address), and, if available, provide registration information including registration number.                                                                                                                               | 4                  |
| Eligibility criteria               | 6  | Specify study characteristics (e.g., PICOS, length of follow-up) and report characteristics (e.g., years considered, language, publication status) used as criteria for eligibility, giving rationale.                                                                                                      | 4                  |
| Information sources                | 7  | Describe all information sources (e.g., databases with dates of coverage, contact with study authors to identify additional studies) in the search and date last searched.                                                                                                                                  | 4                  |
| Search                             | 8  | Present full electronic search strategy for at least one database, including any limits used, such that it could be repeated.                                                                                                                                                                               | Appendix 1         |
| Study selection                    | 9  | State the process for selecting studies (i.e., screening, eligibility, included in systematic review, and, if applicable, included in the meta-analysis).                                                                                                                                                   | 5                  |
| Data collection process            | 10 | Describe method of data extraction from reports (e.g., piloted forms, independently, in duplicate) and any processes for obtaining and confirming data from investigators.                                                                                                                                  | 5                  |
| Data items                         | 11 | List and define all variables for which data were sought (e.g., PICOS, funding sources) and any assumptions and simplifications made.                                                                                                                                                                       | N/A                |
| Risk of bias in individual studies | 12 | Describe methods used for assessing risk of bias of individual studies (including specification of whether this was done at the study or outcome level), and how this information is to be used in any data synthesis.                                                                                      | 6                  |
| Summary measures                   | 13 | State the principal summary measures (e.g., risk ratio, difference in means).                                                                                                                                                                                                                               | N/A                |
| Synthesis of results               | 14 | Describe the methods of handling data and combining results of studies, if done, including measures of consistency (e.g., $I^2$ ) for each meta-analysis.                                                                                                                                                   | N/A                |

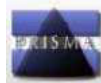

# PRISMA 2009 Checklist

Page 1 of 2

| Section/topic                 | #  | Checklist item                                                                                                                                                                                           | Reported on page #      |
|-------------------------------|----|----------------------------------------------------------------------------------------------------------------------------------------------------------------------------------------------------------|-------------------------|
| Risk of bias across studies   | 15 | Specify any assessment of risk of bias that may affect the cumulative evidence (e.g., publication bias, selective reporting within studies).                                                             | 6                       |
| Additional analyses           | 16 | Describe methods of additional analyses (e.g., sensitivity or subgroup analyses, meta-regression), if done, indicating which were pre-specified.                                                         | N/A                     |
| <b>RESULTS</b>                |    |                                                                                                                                                                                                          |                         |
| Study selection               | 17 | Give numbers of studies screened, assessed for eligibility, and included in the review, with reasons for exclusions at each stage, ideally with a flow diagram.                                          | Figure 1 PRISMA Diagram |
| Study characteristics         | 18 | For each study, present characteristics for which data were extracted (e.g., study size, PICOS, follow-up period) and provide the citations.                                                             | Tables 1 and 2          |
| Risk of bias within studies   | 19 | Present data on risk of bias of each study and, if available, any outcome level assessment (see item 12).                                                                                                | Tables 1 and 2          |
| Results of individual studies | 20 | For all outcomes considered (benefits or harms), present, for each study: (a) simple summary data for each intervention group (b) effect estimates and confidence intervals, ideally with a forest plot. | N/A                     |
| Synthesis of results          | 21 | Present results of each meta-analysis done, including confidence intervals and measures of consistency.                                                                                                  | N/A                     |
| Risk of bias across studies   | 22 | Present results of any assessment of risk of bias across studies (see Item 15).                                                                                                                          | Tables 1 and 2          |
| Additional analysis           | 23 | Give results of additional analyses, if done (e.g., sensitivity or subgroup analyses, meta-regression [see Item 16]).                                                                                    | N/A                     |
| <b>DISCUSSION</b>             |    |                                                                                                                                                                                                          |                         |
| Summary of evidence           | 24 | Summarize the main findings including the strength of evidence for each main outcome; consider their relevance to key groups (e.g., healthcare providers, users, and policy makers).                     | 10-12                   |
| Limitations                   | 25 | Discuss limitations at study and outcome level (e.g., risk of bias), and at review-level (e.g., incomplete retrieval of identified research, reporting bias).                                            | 12                      |
| Conclusions                   | 26 | Provide a general interpretation of the results in the context of other evidence, and implications for future research.                                                                                  | 12-13                   |
| <b>FUNDING</b>                |    |                                                                                                                                                                                                          |                         |
| Funding                       | 27 | Describe sources of funding for the systematic review and other support (e.g., supply of data); role of funders for the systematic review.                                                               | 13                      |

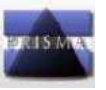

# PRISMA 2009 Checklist

- 1
- 2
- 3
- 4
- 5
- 6
- 7
- 8
- 9
- 10
- 11
- 12
- 13
- 14
- 15
- 16
- 17
- 18
- 19
- 20
- 21
- 22
- 23
- 24
- 25
- 26
- 27
- 28
- 29
- 30
- 31
- 32
- 33
- 34
- 35
- 36
- 37
- 38
- 39
- 40
- 41
- 42
- 43
- 44
- 45
- 46
- 47

doi:10.1371/journal.pmed1000097

For peer review only

# BMJ Open

## Interventions to increase access to or uptake of physical health screening in people with severe mental illness: a realist review

|                                 |                                                                                                                                                                                                                                                                                                                                                                                                                                                                                                                                                                                                                                                                                                                                                                                                                    |
|---------------------------------|--------------------------------------------------------------------------------------------------------------------------------------------------------------------------------------------------------------------------------------------------------------------------------------------------------------------------------------------------------------------------------------------------------------------------------------------------------------------------------------------------------------------------------------------------------------------------------------------------------------------------------------------------------------------------------------------------------------------------------------------------------------------------------------------------------------------|
| Journal:                        | <i>BMJ Open</i>                                                                                                                                                                                                                                                                                                                                                                                                                                                                                                                                                                                                                                                                                                                                                                                                    |
| Manuscript ID                   | bmjopen-2017-019412.R1                                                                                                                                                                                                                                                                                                                                                                                                                                                                                                                                                                                                                                                                                                                                                                                             |
| Article Type:                   | Research                                                                                                                                                                                                                                                                                                                                                                                                                                                                                                                                                                                                                                                                                                                                                                                                           |
| Date Submitted by the Author:   | 15-Nov-2017                                                                                                                                                                                                                                                                                                                                                                                                                                                                                                                                                                                                                                                                                                                                                                                                        |
| Complete List of Authors:       | Lamontagne-Godwin, Frederique; University of West London College of Nursing Midwifery and Healthcare, Richard Wells Research Centre<br>Burgess, Caroline; Kings College London, Institute of Psychiatry<br>Clement, Sarah; Freelance researcher<br>Gasston-Hales, Melanie; University of West London College of Nursing Midwifery and Healthcare<br>Greene, Carolynn; University of West London College of Nursing Midwifery and Healthcare<br>Manyande, Anne; University of West London - Brentford Site, School of Human and Social Sciences<br>Taylor, Deborah; University of West London College of Nursing Midwifery and Healthcare<br>Walters, Paul; Dorset HealthCare University NHS Foundation Trust<br>Barley, Elizabeth; University of West London - Brentford Site, School of Human and Social Sciences |
| <b>Primary Subject Heading</b>: | Public health                                                                                                                                                                                                                                                                                                                                                                                                                                                                                                                                                                                                                                                                                                                                                                                                      |
| Secondary Subject Heading:      | Mental health, General practice / Family practice, Health services research                                                                                                                                                                                                                                                                                                                                                                                                                                                                                                                                                                                                                                                                                                                                        |
| Keywords:                       | Organisation of health services < HEALTH SERVICES ADMINISTRATION & MANAGEMENT, Protocols & guidelines < HEALTH SERVICES ADMINISTRATION & MANAGEMENT, PRIMARY CARE, Adult psychiatry < PSYCHIATRY, PUBLIC HEALTH, Lipid disorders < DIABETES & ENDOCRINOLOGY                                                                                                                                                                                                                                                                                                                                                                                                                                                                                                                                                        |
|                                 |                                                                                                                                                                                                                                                                                                                                                                                                                                                                                                                                                                                                                                                                                                                                                                                                                    |

SCHOLARONE™  
Manuscripts

1  
2  
3 Title of the article: Interventions to increase access to or uptake of physical health screening in  
4 people with severe mental illness: a realist review  
5

6 Frédérique Lamontagne-Godwin<sup>1</sup>, Caroline Burgess<sup>2</sup>, Sarah Clement<sup>3</sup>, Melanie Gasston-Hales<sup>1</sup>,  
7 Carolynn Greene<sup>1</sup>, Anne Manyande<sup>4</sup>, Deborah Taylor<sup>1</sup>, Paul Walters<sup>5</sup>, Elizabeth Barley<sup>4</sup>  
8  
9

10 <sup>1</sup>University of West London, College of Nursing, Midwifery and Healthcare, London, UK.

11 <sup>2</sup>King's College London, Primary Care and Public Health Sciences, London, UK.

12 <sup>3</sup>Freelance researcher, UK.

13 <sup>4</sup>University of West London, School of Human and Social Sciences, London, UK.

14 <sup>5</sup>Dorset HealthCare University NHS Foundation Trust, Bournemouth, UK.  
15  
16  
17

18 Full name, postal address, e-mail and telephone number of the corresponding author:  
19  
20

21 Frédérique Lamontagne-Godwin

22 Richard Wells Research Centre

23 College of Nursing, Midwifery and Healthcare

24 The University of West London

25 Paragon House

26 Boston Manor Road

27 Brentford, Middlesex

28 TW8 9GA

29 United Kingdom

30 [Frederique.lamontagne-godwin@uwl.ac.uk](mailto:Frederique.lamontagne-godwin@uwl.ac.uk)

31 +44 (0)20 8209 4145  
32  
33  
34  
35  
36

37 Word count, excluding title page, abstract, references, figures and supplementary tables: 4,250  
38  
39  
40  
41  
42  
43  
44  
45  
46  
47  
48  
49  
50  
51  
52  
53  
54  
55  
56  
57  
58  
59  
60

**ABSTRACT**

**Objectives:** To identify and evaluate interventions aimed at increasing uptake of, or access to, physical health screening by adults with severe mental illness; to examine why interventions might work.

**Design:** Realist Review.

**Setting:** Primary, secondary and tertiary care.

**Results:** A systematic search identified 1448 studies, of which 22 met the inclusion criteria. Studies were from Australia (n =3), Canada (n =1), Hong Kong (n =1), United Kingdom (n =11) and United States (n =6). The studies focused on breast cancer screening, infection preventive services and metabolic syndrome (MS) screening by targeting MS-related risk factors. The interventions could be divided into those focusing on 1) health service delivery changes (12 studies), using quality improvement, RCT, cluster randomized feasibility trial, retrospective audit, cross-sectional study and satisfaction survey designs, and 2) tests of tools designed to facilitate screening (10 studies) using consecutive case series, quality improvement, retrospective evaluation, and pre-post audit study designs. All studies reported improved uptake of screening, or that patients had received screening they would not have had without the intervention. No estimation of overall effect size was possible due to heterogeneity in study design and quality. The following factors may contribute to intervention success: staff and stakeholder involvement in screening; staff using less invasive equipment; strong links with primary care and having a pharmacist on the ward.

**Conclusions:** A range of interventions may be effective, but better quality research is needed to determine any effect size. Researchers should consider how interventions may work when designing and testing them in order to target better the specific needs of this population in the most appropriate setting. Behaviour change interventions to reduce identified barriers of patient and health professional resistance to screening this population are required. Resource constraints, clarity over professional roles and better coordination with primary care need to be addressed.

**Strengths and limitations of this study:**

- In line with the realist review methodology, a broad and inclusive study identification process was used, which was adapted iteratively to compensate for the inconsistency around how terms such as 'screening' and 'monitoring' are used.
- A realist review explores why interventions might work in a particular setting however studies provide limited evidence for this so transferability of knowledge to other settings is limited.



- A realist review is often selected to understand complex interventions, however behaviour change theory was not included in almost any intervention design, making it impossible to discern which 'active ingredients' are at work to produce the results.

## INTRODUCTION

People with severe mental illness (SMI), such as schizophrenia or bipolar disorder, have been found to have a 2-3 fold increased risk of premature mortality<sup>1</sup>. A reduction in life expectancy of 10-20 years has been reported<sup>(2,3)</sup>. A significant cause of this disparity is attributed to preventable and treatable long-term physical health conditions, with cardiovascular disease and cancer as the first and second leading cause of death respectively in this group<sup>(2,4)</sup>. Cancer mortality in people with SMI is more likely than in the general population<sup>5</sup>, though the incidence of disease is similar for both groups<sup>6</sup>. One factor which contributes to inequality in survival rates is access to cancer screening<sup>7</sup>. The reported 30% higher case fatality rate from cancer, may partly be due to those with SMI being more likely to present with metastases at diagnosis<sup>5</sup>.

Other physical health conditions found to be more prevalent in people with SMI include type 2 diabetes and metabolic syndrome (MS)<sup>(8,9)</sup>, tuberculosis, HIV, osteoporosis, poor dentition, impaired lung function, sexual dysfunction and obstetric complications<sup>2</sup>. MS is defined by the World Health Organisation<sup>10</sup> as glucose intolerance, diabetes mellitus and/or insulin resistance, with two or more of the following: central obesity [ $>0.9$  in men and  $>0.85$  in women and/or body mass index (BMI)  $>30$  kg/m<sup>2</sup>], raised arterial pressure [ $\geq 140/90$  mmHg], microalbuminuria [ $\geq 20$   $\mu$ gm/minute or albumin/creatinine ratio  $\geq 30$   $\mu$ gm/mg] and raised plasma triglyceride [ $\geq 150$  mg/dl and/or low HDL-C ( $<35$  mg/dl in men and  $<39$  mg/dl in women)].

Health screening facilitates early detection and treatment for many of these conditions, though rates of screening in people with SMI may be reduced compared to the general population. A UK survey<sup>11</sup> found that only 33% of people with schizophrenia had received adequate CVD screening in the previous 12 months and, internationally uptake of breast, cervical and bowel cancer screening has been found to be lower among people with SMI<sup>(6,12-15)</sup>. Effective interventions for increasing access to, or uptake of, screening for a range of conditions in the general population<sup>16</sup> exist. In relation to cancer screening, a Cochrane review<sup>17</sup> found that no intervention to promote uptake has been tested in people with SMI. This is important since qualitative work<sup>18</sup> indicates there are specific barriers to cancer screening uptake in people with SMI and that interventions effective in the general population may not be in the SMI population. Furthermore, barriers to screening uptake or

1  
2  
3 access may vary for different types of screening, at different stages of the screening process and  
4 between individuals<sup>18</sup>.  
5

6  
7 Realist review methodology<sup>19</sup> has been devised to enable synthesis of diverse literature in order to  
8 explore not only what works for whom, as in traditional systematic reviews, but also why an  
9 intervention may work<sup>20</sup>.  
10  
11

12  
13  
14 By drawing on this methodology, our objectives were to identify and evaluate interventions which  
15 may increase uptake of, or access to, any kind of physical health screening by adults with SMI, and to  
16 determine what works for whom in what setting and why. The review is described in accordance  
17 with the RAMESES reporting guidance for realist reviews<sup>21</sup>.  
18  
19

## 20 **METHODS**

### 21 **Study Selection**

22  
23 Inclusion and exclusion criteria

24  
25  
26  
27 Studies of any intervention to promote access to, or uptake of, screening or monitoring for any  
28 physical health condition where participants were aged 18 years and over with a diagnosis of SMI  
29 (psychosis or bipolar disorder however diagnosed) were eligible. Uptake of screening was the main  
30 outcome of interest. Patient related outcomes were not an inclusion criteria, but were included in  
31 the Supplementary Tables following the review of the studies, to provide important additional  
32 information and give a rounded picture of the effectiveness of the interventions. The UK National  
33 Screening Committee defines screening as a 'public health service in which members of a defined  
34 population (...) are asked a question or offered a test, to identify those individuals who are more  
35 likely to be helped than harmed by further tests or treatment to reduce the risk of a disease or its  
36 complications'<sup>22</sup>. 'Monitoring' was defined in a Cochrane<sup>23</sup> review as a means 'to obtain information  
37 which can then be acted on to treat or prevent a physical health problem'. We included any  
38 intervention described as promoting either screening or monitoring; for clarity the term 'screening'  
39 is used throughout. Only studies reported in English were included.  
40  
41  
42  
43  
44  
45  
46  
47

48  
49 In line with the realist approach to literature synthesis<sup>19</sup>, an inclusive approach was taken and  
50 intervention studies of any design were eligible as long as the full text was published in a peer  
51 reviewed journal. We also excluded intervention studies to improve physical health in people with  
52 SMI which may involve screening, but where uptake or access to screening was not a main outcome  
53 and service evaluations or audits which considered screening, but did not test any intervention.  
54  
55  
56  
57  
58  
59  
60

### Search Strategy

The protocol is published on the PROSPERO database<sup>24</sup>. The search strategy (Appendix 1) was informed by published, related systematic reviews<sup>(8,17,20)</sup> and was checked by a specialist health librarian at the University of West London (Marc Forster PhD). Searching was conducted in December 2016.

### Data sources

Medline, Embase, Cumulative Index to Nursing and Allied Health Literature (CINAHL), PsychINFO, Cochrane Database of Systematic Reviews, Database of Abstracts of Reviews of Effectiveness. Reference chaining of identified studies was also conducted. No date restrictions were applied.

### Search results

The initial electronic search identified 1872 potentially relevant publications; six others were identified through reference chaining. Titles and abstracts were screened independently by two team members (EB and AM). Thirty-three full texts were retrieved and screened by at least two team members (EB, AM, DT). Among the thirty-three full texts was a recent systematic review of studies of 'Strategies to implement physical health monitoring in people affected by severe mental illness'<sup>25</sup> which included 14 studies. Though the focus of this review was slightly different from the current, it contained one study which we had included<sup>26</sup>. It also included two studies which we had excluded: one<sup>27</sup> was not an intervention study, the other tested the validity of a health monitoring tool<sup>28</sup>. This led to a team discussion whereby it was decided that studies of interventions, such as health monitoring tools, were relevant to our review question. The rationale being that, although the aim of such studies was to improve the quality of screening (e.g. more health indicators measured) and ongoing monitoring, this often resulted in increased uptake. We re-screened our identified studies and those included in this review<sup>25</sup>. 44 studies were identified as potentially relevant and were screened by two reviewers. Twenty-two of these did not meet the inclusion criteria, a total of 22 studies were included. The screening and study selection processes are detailed in Figure 1.

**Figure 1.** PRISMA Flow Diagram of intervention studies included and excluded from this review

### Data extraction

Each reviewer independently extracted information from up to 5 articles, with one author (EB) reviewing all studies. Data were extracted regarding study authors, geographical location and

1  
2  
3 setting, year of publication, participant characteristics, features of the intervention, target of  
4 screening, outcome measures, study design and limitations.  
5  
6

### 7 **Approach to synthesis**

8  
9 Similarities in intervention approach were identified and summarized across studies. Exploration of  
10 how and why different approaches might have worked was undertaken by searching for themes  
11 across studies, paying particular attention for disconfirming evidence. As there was considerable  
12 between-study variation in outcome measures meta-analysis was not possible.  
13  
14  
15

## 16 **RESULTS**

### 17 **Study characteristics**

18  
19 Study characteristics are detailed in Supplementary Tables 1 and 2. Two studies<sup>(29,30)</sup> included breast  
20 cancer screening, one<sup>30</sup> considered infection preventive services and 21 studies considered  
21 metabolic syndrome screening by targeting MS-related risk factors (cholesterol/sugar<sup>(26,28,31-48)</sup>, blood  
22 pressure (BP)<sup>(26,28-31,33-46)</sup> and BMI<sup>(26,28,30,31-46,48)</sup>). Two studies involved national screening  
23 programmes<sup>(29,30)</sup> and 20 studies developed 'in-house' screening<sup>(26,28,31-48)</sup>. Study populations  
24 included participants with schizophrenia<sup>(28-31,33-35,37-38,40,44-47)</sup>, bipolar disorder<sup>(28-31,33,35,38,44-47)</sup>,  
25 schizoaffective disorder<sup>(28,29,31,33,35,44-47)</sup>, other psychotic disorders<sup>(28,30,34-35,38,45-46)</sup> and other mental  
26 health disorders<sup>(29-31,33,38,44-46)</sup>. Some studies did not specify the SMI<sup>(26,39,42-43)</sup> while other studies  
27 included SMI patients on antipsychotics<sup>(32,36,41,47,48)</sup> with no breakdown by condition. Some of the  
28 participants in a few of the included studies had mental health disorders other than SMI. In those  
29 studies, there was a minimum of 45% of participants who had either a psychosis or bipolar disorder  
30 diagnosis.  
31  
32  
33  
34  
35  
36  
37  
38  
39

40  
41 A range of study designs was employed (pre-post audit n=9, consecutive prospective case series  
42 design n=1, repeat audit n=1, cross-sectional study n=1, QI n=4, retrospective audit n=4, RCT n=1,  
43 cluster randomized feasibility trial n=1). Study quality of randomized trials<sup>(45-46)</sup> was assessed using  
44 the Cochrane tool<sup>49</sup> for assessing risk of bias. No similar 'gold standard' tool exists which could be  
45 used across the other study designs, so we assessed each study informed by a simple checklist based  
46 on the STrengthening the Reporting of OBServational studies in Epidemiology<sup>50</sup> (STROBE) statement  
47 and a recent review of tools to assess bias in observational studies<sup>51</sup>. Each study was rated  
48 independently by two reviewers with discrepancies resolved by discussion. Flaws relating to the  
49 reliability of findings or the generalizability of results were highlighted in all studies (Supplementary  
50  
51  
52  
53  
54  
55  
56  
57  
58  
59  
60

1  
2  
3 Tables 1-2); these data suggest that findings concerning the size of effect should be considered with  
4 caution.  
5

### 6 7 **Review outcomes**

8  
9 Interventions to increase *uptake* of screening are defined as interventions which support health  
10 professionals to screen for physical health conditions<sup>(28,32-48)</sup>. Interventions to increase *access* to  
11 screening are defined as interventions (targeted at health professionals or health service delivery) to  
12 increase patient/client access to screening<sup>(26,29-31)</sup>.  
13  
14

### 15 16 **Intervention effects**

17  
18 Overall, improvements in rates of screening were reported in all studies following intervention  
19 (Supplementary Tables 1-2). This appeared to be independent of screening type or study design. We  
20 identified an evidence gap as only three studies<sup>(31-32,48)</sup> reported whether the results of screening  
21 were acted upon, for instance through referral or clinical intervention.  
22  
23

### 24 25 **Intervention type**

26  
27 Studies broadly either tested a new tool to facilitate screening for health professionals<sup>(28,32-33,35-39,47)</sup>  
28 (Supplementary Table 1) or made complex health services delivery changes<sup>(26,29-31,40-46,48)</sup>  
29 (Supplementary Table 2). One intervention<sup>26</sup> primarily targeted service users, though in other  
30 studies<sup>(29,40,44)</sup> service user-focused interventions were included, for instance targeted  
31 education<sup>(33,40)</sup>, self-management support<sup>44</sup> or support to attend screening<sup>29</sup>. Most studies included  
32 staff education<sup>(38,40,43,45-46,48)</sup> and training<sup>(28,33,35,39,42)</sup> as part of the intervention.  
33  
34  
35  
36  
37

38  
39 The data collection tools tested in Supplementary Table 1 were designed to gather information  
40 required to improve MS screening<sup>(32-33,38,47)</sup> or physical health monitoring<sup>(28,34-37,39)</sup>. MS monitoring  
41 was evaluated using the following measurements: BP, smoking status, waist circumference (WC),  
42 fasting blood glucose (BG), BMI triglycerides and high density lipoprotein cholesterol. These  
43 measures were based on the following clinical guidelines: National Institute for health and Care  
44 Excellence<sup>(26,31,35-37,39,40-41)</sup>, Maudsley prescribing guidelines<sup>(34,37,40-42)</sup>, U.S. Preventive Services Task  
45 Force<sup>(30,44)</sup>, National Heart, Lung and Blood Institute<sup>33</sup>, American Diabetes Association<sup>(32-34,38,47)</sup>, Early  
46 Psychosis Prevention and Intervention Centre<sup>43</sup>, Psychotropic Therapeutic Guidelines<sup>48</sup>, American  
47 Psychiatric Association Practice<sup>(28,38)</sup> and de Hert (2009) guidelines<sup>35</sup>. Most interventions were multi-  
48 faceted so will appear in more than one cluster. As no studies were rated of good or moderate  
49 quality it was difficult to assess whether findings of improvements in rates of screening are valid. The  
50 size of effect was not reported for any study.  
51  
52  
53  
54  
55  
56  
57  
58  
59  
60

1  
2  
3  
4  
5 **Screening template:** Eight studies<sup>(28,32-34,36-39)</sup> evaluated the effectiveness of using a screening tool to  
6 increase uptake and raise staff awareness of physical health screening. Barriers to successful  
7 intervention implementation included 'social desirability bias'<sup>(28,36)</sup> (patients self-report their health  
8 behaviour in an overly positive picture in an effort to please their keyworkers); low uptake of  
9 invasive test measurements e.g. WC<sup>(32,37)</sup>, BP<sup>38</sup>, fasting BG<sup>(33,37)</sup> and of data on sensitive topics<sup>36</sup>;  
10 difficulty to capture monitoring results onto the tool<sup>(28,32,38-39)</sup>; difficulty in obtaining equipment<sup>(37-38)</sup>  
11 and accessing laboratory services<sup>33</sup>; lack of integration with primary care for treatment or  
12 referral<sup>(33,37-38)</sup>; appointment non-adherence<sup>(32-33)</sup>; lack of expertise in mental health professionals to  
13 interpret physical health results<sup>(34,37)</sup>; workload issues<sup>(32-33,38)</sup>; staff reluctant to see MS screening as  
14 their responsibility<sup>(32-33,34)</sup>. Authors across studies identified the following facilitators: investment of  
15 staff in physical health monitoring<sup>(33,36-37,39)</sup> and staff flexibility by using alternative equipment and  
16 tests<sup>(33,39)</sup>.  
17  
18  
19  
20  
21  
22  
23

24  
25 **Staff education and training:** Five studies<sup>(28,33,35,38-39)</sup> included staff training as a component of the  
26 intervention. No author described the content or format of education interventions in detail.  
27 Barriers to successful intervention implementation included workload issues<sup>(33,35,38)</sup>; lack of training  
28 to spot 'social desirability bias'<sup>28</sup>; lack of training in mean WC measurement<sup>28</sup>. The following  
29 facilitators were identified: 'booster' education and team meetings<sup>33</sup> and investment of staff in  
30 physical health monitoring<sup>(33,39)</sup>.  
31  
32  
33  
34  
35

36 **Computer or paper prompt for staff:** Four studies<sup>(34,37,39,47)</sup> tested a computer or paper based  
37 prompts to support clinicians to monitor and screen physical health indicators. Barriers to the  
38 successful implementation of the intervention included technical constraints in terms of collecting  
39 measurement results<sup>(39,47)</sup>; low uptake of invasive test measurements e.g. WC<sup>37</sup> and fasting BG<sup>(37,47)</sup>;  
40 lack of expertise from mental health professionals to interpret physical health results<sup>(34,37)</sup>; unclear  
41 communication channel between primary and secondary care<sup>(34,37)</sup> and limited access to equipment  
42 and resources<sup>(34,37)</sup>. Having a clinical psychiatric pharmacist on the ward to remind clinicians to  
43 request investigations such as blood tests when appropriate and to provide the relevant guidelines  
44 and precautions when initiating hypolipidemic medication was a facilitator in two studies<sup>(37,47)</sup>.  
45  
46  
47  
48  
49  
50

51  
52 Supplementary Table 2 describes twelve studies which tested interventions that delivered change in  
53 a health service setting. Most interventions were multi-faceted so appear in more than one cluster.  
54 All studies targeted adults, though in one study<sup>42</sup> eligible participants were 14-35 years old. Studies  
55  
56  
57  
58  
59  
60

1  
2  
3 took place in a clozapine clinic<sup>48</sup>, Early Intervention in Psychosis Services<sup>(41-43)</sup>, Community Mental  
4 Health Team (CMHT)<sup>(31,44-45)</sup>, community drop-in centre<sup>29</sup> and primary care<sup>(26,30)</sup>. Interventions were  
5  
6 focused on metabolic/cardiovascular screening for all studies, except one<sup>29</sup> which was designed to  
7  
8 increase rates of mammography uptake. One study<sup>30</sup> monitored uptake of national cancer screening  
9  
10 services and metabolic screening. The size of effect was not reported for any study. All studies  
11  
12 reported sub-optimal screening and monitoring at baseline, with improved levels post intervention.  
13  
14 However, limited evidence of actions, such as referral or intervention, occurring as a result of these  
15  
16 improvements was reported.

17 **Staff education and training:** Six studies<sup>(40,42-43,45-46,48)</sup> provided some kind of staff (working in primary  
18  
19 and secondary care) and patient education. All studies described increased rates of monitoring  
20  
21 following the interventions. One study<sup>45</sup> was rated as good quality, so generalization of results is  
22  
23 limited. Barriers to the successful implementation of the intervention included staff time  
24  
25 constraints<sup>(40,48)</sup>; poor communication across the primary and secondary care interface<sup>(43,45)</sup> and lack  
26  
27 of clarity over scope of practice<sup>48</sup>; patient resistance to invasive tests<sup>(42,46)</sup>; staff resistance to  
28  
29 change<sup>(40,45,46)</sup> and staff turnover<sup>(43,46)</sup>. Facilitators included team ownership and team 'champions' to  
30  
31 encourage screening<sup>(40,42)</sup> and high visibility/structure around monitoring and better liaison with  
32  
33 primary care<sup>(42,48)</sup>.

34 **Invitation letter to physical health screening:** Three studies<sup>(26,40,42)</sup> used an invitation letter from  
35  
36 primary care to encourage patients to attend screening as part of a physical health check-up. All  
37  
38 studies described increased rates of monitoring following the interventions. Barriers to the  
39  
40 successful implementation of the intervention included patient resistance to invasive tests<sup>42</sup> and  
41  
42 staff resistance to change<sup>40</sup>. Facilitators included team<sup>(40,42)</sup> ownership and team 'champions' to  
43  
44 encourage screening; getting stakeholders involved<sup>(40,42)</sup> and living in a suburban<sup>26</sup> (rather than  
45  
46 urban) area.

47 **Improving access to monitoring resources:** Four studies<sup>(41,43,46,48)</sup> tested interventions developed to  
48  
49 improve the collection of physical health data to increase screening. Barriers to the successful  
50  
51 implementation of the intervention included patient resistance and lack of motivation in the  
52  
53 screening process<sup>(41,46)</sup>; inadequate links with primary care<sup>(41,43)</sup>; no clarity about who takes  
54  
55 responsibility for screening<sup>(41,48)</sup>; staff turnover<sup>(43,46)</sup>; staff not perceiving physical health screening as  
56  
57 a priority<sup>(41,46)</sup>; time and resource (screening equipment) constraints<sup>(41,48)</sup>; poor recording and  
58  
59

1  
2  
3 knowledge of screening guidelines and tests<sup>(41,48)</sup>. Facilitators included high visibility and structure  
4 around monitoring<sup>48</sup> and having a key worker system with key worker's duties involving screening<sup>41</sup>.  
5  
6

7  
8 **Integrating care across health settings:** Seven studies<sup>(29-31,40,42,44-45)</sup> were developed to evaluate and  
9 reduce the fragmentation of care between different care providers. New clinics to improve physical  
10 healthcare were set up and evaluated<sup>(29-31)</sup>, two trials<sup>(44-45)</sup> evaluated nurse-led care management  
11 and two studies audited improvement in awareness<sup>42</sup> and communication<sup>40</sup> within the  
12 multidisciplinary care coordination team. All reported improvement in physical health monitoring or  
13 uptake of screening tests post intervention. Two studies<sup>(44-45)</sup> were rated as good quality. One study<sup>44</sup>  
14 reported improvement in cardiovascular disease risk among intervention subjects of an effect size  
15 comparable to that seen in underserved populations without mental illness. Barriers to the  
16 successful implementation of the intervention included lack of coordination across the primary and  
17 secondary care interface<sup>(30,45)</sup>; patient reluctance to attend appointment/undergo screening<sup>(29,42)</sup>;  
18 staff resistance to change<sup>(40,45)</sup> and lack of a prescribing provider<sup>44</sup>. Facilitators included team  
19 investment in screening procedure and stakeholder involvement<sup>(29,31,40,42)</sup>; psychosocial support and  
20 trust between patients and staff to help them obtain screening<sup>(29,44)</sup> and availability of primary and  
21 specialist care<sup>(29,30,42,45)</sup>.  
22  
23  
24  
25  
26  
27  
28  
29  
30

31 **Staff accompaniment to appointments:** Four studies<sup>(29,33,40,44)</sup> included accompaniment of service  
32 users to appointments as part of their intervention. This type of intervention addresses potential  
33 difficulties in locating and visiting unfamiliar places which has been reported as a barrier to cancer  
34 screening uptake by some service users<sup>18</sup>. One study<sup>33</sup> from Supplementary Table 1 was added to  
35 this cluster as it included staff accompaniment to screening. Barriers to the successful  
36 implementation of the intervention included staff workload issues<sup>(33,40)</sup>; difficulty to engage  
37 staff<sup>(33,40)</sup>; patient reluctance to undergo screening<sup>(29,33)</sup> and difficulty to obtain an  
38 appointment/appointment non-adherence<sup>(29,33)</sup>. Facilitators included staff feeling invested/having a  
39 sense of ownership with regard physical health screening<sup>(29,33,40)</sup>; having access to primary care/in-  
40 home phlebotomy services<sup>(29,33,44)</sup> and trust between clients and staff<sup>(29,33)</sup>.  
41  
42  
43  
44  
45  
46  
47  
48

## 49 **DISCUSSION**

### 50 **Statement of principal findings**

51  
52  
53 A large international body of work was identified with diversity in the number of physical health  
54 conditions and clinical settings. Challenges to increase uptake of physical health screening and  
55 monitoring in people with SMI was not unique to a particular country, setting or health service  
56  
57  
58  
59  
60



1  
2  
3 configuration. The studies illustrate that people with SMI come into contact with a number of  
4 different health services. Two tools to facilitate screening<sup>(35,39)</sup> and two health service delivery  
5 change<sup>(26,40)</sup> interventions were delivered in primary care. The remaining took place in inpatient and  
6 outpatient mental health services. Mental health staff performed 'in-house'  
7 screening<sup>(28,31,36,37,43,46,48)</sup>, ordered screening tests<sup>(30,31,32,33,34,38,41,42,43,45,47)</sup> or acted as a broker between  
8 the patient and screening service<sup>(29,33,41,44)</sup>. Overall there appears to be no strong evidence as to  
9 whether an intervention to increase uptake of screening would be better suited in primary or  
10 secondary care. Performing 'in-house' screening in mental health services rather than in a primary  
11 care context warrants further research, including what training and equipment this requires. In  
12 addition, mechanisms to establish and maintain strong links between primary care/screening clinics  
13 and mental health services to ensure patients attend screening appointments, appear central to  
14 monitoring patients' physical health.

15  
16 Identified barriers to the successful implementation of tools to facilitate screening can be clustered  
17 into resource constraints, environmental barriers, unclear boundaries around professional role and a  
18 perceived lack of professional skills and training. Authors in several studies<sup>(33,34,37,38,39,47)</sup> noted a  
19 number of logistical and resource constraints to the successful collection of measurements due to  
20 limited staff time<sup>(32,33,35,38)</sup> and difficulty accessing monitoring equipment (such as specific WC tool for  
21 obese patients and access to BP monitors in CMHTs). Staff also reported difficulties capturing  
22 monitoring results onto the tool<sup>(28,32,38,39)</sup> (e.g. complicated guidelines to follow). Other barriers  
23 included patient resistance to exploring sensitive topics such as sexual health, and transportation,  
24 cultural and language barriers to access phlebotomy clinics and arranging an appointment.

25  
26 Authors in several studies<sup>(32,33,36,37,38,47)</sup> noted low uptake of invasive test measurements e.g. WC,  
27 fasting (BG) and appointment non-adherence to cancer screening and MS monitoring. Lack of  
28 integrated care between mental health services and primary care<sup>(33,34,37,38)</sup> for treatment and referral  
29 post-diagnosis was another barrier. Some mental health staff were reluctant to see MS screening as  
30 their responsibility<sup>(32,33)</sup>, leading to resistance to engage in this activity. The lack of training to collect  
31 WC data in a uniform way, and unawareness of a potential 'social desirability bias'<sup>(28,36)</sup>, lead to the  
32 risk of unreliable results. Lastly, a perceived lack of expertise from mental health professionals to  
33 interpret physical health results<sup>(34,37)</sup> was raised as a potential barrier.

34  
35 Several facilitators to the successful implementation of tools to facilitate screening were identified,  
36 including staff feeling invested and having a sense of 'ownership' in physical health

1  
2  
3 monitoring<sup>(33,36,37,39)</sup>, staff flexibility around taking measures by using alternative (e.g. less invasive)  
4 equipment and tests<sup>(33,39)</sup> and having a clinical psychiatric pharmacist<sup>(37,47)</sup> on the ward to support  
5 mental health professionals e.g. by reminding staff to request blood tests and provide the relevant  
6 guidelines and precautions to follow when hypolipidemic agents are prescribed.  
7  
8

9  
10  
11 Barriers to the successful implementation of health service delivery changes are clustered into  
12 resource constraints, environmental barriers, unclear boundaries around professional role and  
13 patient resistance. Authors note lack of time<sup>(33,40,47)</sup> for health professionals to allocate to screening  
14 as a barrier as well as staff turnover<sup>(43,46)</sup> and other resource constraints<sup>(41,44,47)</sup> such as lack of  
15 screening equipment and a prescribing provider. Environmental barriers include lack of coordination  
16 across the primary and secondary care interface<sup>(30,41,43,45)</sup> and difficulty for patients and staff to  
17 obtain a screening appointment<sup>(29,33)</sup>. Reluctance to engage in screening was observed from the  
18 clinician and patient perspective. In staff, limited clarity over who takes responsibility for  
19 screening<sup>(41,48)</sup> was a barrier, as well as difficulty to engage staff<sup>(33,40)</sup> in the project, staff resistance to  
20 change<sup>(40,45,46)</sup> and staff not perceiving physical health screening as a priority<sup>(41,46)</sup>. In patients,  
21 reluctance to engage with screening was identified as lack of motivation/skepticism in the screening  
22 process<sup>(41,46)</sup>, appointment non-adherence<sup>(29,33,42)</sup> and particular resistance to invasive tests<sup>(42,46)</sup>.  
23  
24  
25  
26  
27  
28  
29  
30

31 Facilitators to the successful implementation of health service delivery changes include having team  
32 'champions' or a key worker to encourage screening, having staff that feel invested/a sense of  
33 ownership with regard physical health screening<sup>(29,33,40,41,42,47)</sup>, stakeholder involvement<sup>(29,31,40,42)</sup>,  
34 having strong links to primary care and specialist services<sup>(29,30,33,42,45,48)</sup> including at-home phlebotomy  
35 services and established trust between clients and staff<sup>(29,33,44)</sup>. Barriers to the successful  
36 implementation of tools and health service delivery changes to facilitate screening include workload  
37 issues, resource constraints such as difficulty accessing monitoring equipment, patient resistance to  
38 screening and difficulty in arranging an appointment, fragmented links between primary and  
39 secondary care, unclear professional role boundaries for screening and staff resistance to engage in  
40 screening. Facilitators to the successful implementation of tools and health service delivery changes  
41 to facilitate screening include staff feeling invested and a sense of 'ownership' to engage in physical  
42 health monitoring.  
43  
44  
45  
46  
47  
48  
49

50  
51  
52 The quality of data identified was generally low, it is therefore not possible to determine the size of  
53 effect any intervention may have. Different interventions may target different aspects of screening  
54 and different barriers and facilitators may apply. However, the high level of heterogeneity and the  
55  
56  
57  
58  
59  
60

1  
2  
3 limited quality of evidence meant that it is not possible to draw firm conclusions. Several potentially  
4 useful intervention approaches were identified however. A key aim of this review was to identify  
5 what approach worked for whom. However, this was not achieved since few studies tested this.  
6 Nevertheless, the review identified specific barriers and facilitators to screening uptake or access in  
7 people with SMI which should be considered in future studies.  
8  
9

10  
11  
12 Future studies should be reported using the TiDieR guidelines<sup>52</sup> and Medical Research Council  
13 (MRC)<sup>53</sup> guidance to make explicit how the components of complex interventions may work.  
14 Similarly, use of behaviour change theory was considered in one intervention design<sup>43</sup> – some  
15 studies acknowledged it was not considered – which provides no insight into what might have  
16 impacted on staff and service user behaviour to increase uptake. Few interventions were designed in  
17 collaboration with service users, nor were their preferences explored.  
18

19  
20  
21 There are no longitudinal studies therefore this review is unable to clarify if screening is maintained  
22 post intervention and whether the increase in uptake is sustainable or a consequence of the  
23 Hawthorne effect whereby health professional behavior reacts to being observed. An evidence gap  
24 was identified as only three studies<sup>(31-32,46)</sup> reported on whether the results of screening were acted  
25 upon, for instance through referral or clinical intervention. One study<sup>33</sup> aims to make annual MS  
26 screening a 'routine responsibility' for the mental health team but acknowledges it cannot refer  
27 patients to primary care.  
28  
29  
30  
31

### 32 **Study limitations**

33  
34 There is inconsistency around how terms such as 'screening' and 'monitoring' are used which  
35 hampers comparative exercises. Our method of deploying them may differ to that of others who  
36 may use different terms and include different studies. To compensate for this, and in line with realist  
37 review methodology, we used a broad and inclusive study identification process which we adapted  
38 iteratively through the study selection process, as described above. We identified a wide range of  
39 studies with varied participants, settings, interventions and intervention targets; a narrower review  
40 may provide answers which are more applicable to particular situations, however, the lack of good  
41 quality evidence identified suggests that this is unlikely to be the case.  
42  
43  
44  
45  
46  
47  
48

## 49 **CONCLUSION**

### 50 **Policy implications**

51  
52 Interventions to reduce patient and health professional resistance to screening which are informed  
53 by behaviour change theory should be developed and tested. Strategies to improve coordination  
54 between primary and secondary care are also needed, as are guidelines to clarify professional role  
55  
56  
57  
58  
59  
60

boundaries. Resource constraints such as staff time and lack of monitoring equipment in mental health settings need to be addressed in the various clinics where screening occurs. Involving service users in intervention design is also important so that their preferences for location, frequency and type of support can be identified and targeted. Consideration of how interventions are likely to work should be made during development and testing.

**A. Contributors:** EB, CB, SC and DT were involved in the study design. EB, MGH, FLG, AM and DT acquired and analysed the data. EB, SC, FLG and PW interpreted the data. FLG and AM drafted the manuscript. CB, SC, FLG and PW critically revised the manuscript for intellectual content. EB, CB, SC, MGH, CG, FLG, AM, DT and PW contributed to writing and interpretation of the results.

**B. Competing interests:** None.

**C. Funding:** This research received no specific grant from any funding agency in the public, commercial or not-for-profit sectors.

**D. Data sharing statement:** No additional data are available.

## REFERENCES

1. Walker ER, McGee RE, Druss BG. Mortality in mental disorders and global disease burden implications: a systematic review and meta-analysis. *JAMA Psychiatry*2015;72(4):334-41.
2. De Hert M, Correll CU, Bobes J, et al. Physical illness in patients with severe mental disorders. I. Prevalence, impact of medications and disparities in health care. *World Psychiatry*2011;10: 52–77.
3. Chang C-K, Hayes RD, Perera G, et al. Life Expectancy at birth for people with serious mental illness and other major disorders from a secondary mental health care case register in London. *PLoS One*2011;6:e19590.
4. Brown S, Kim M, Mitchell C, et al. Twenty-five year mortality of a community cohort with schizophrenia. *Br J Psychiatry*2010;196:116-21.
5. Kisely S, Crowe E, Lawrence D. Cancer-Related Mortality in People With Mental Illness. *JAMA Psychiatry*2013;70(2):209–217.
6. Howard LM, Barley EA, Davies E, et al. A diagnosis of cancer in people with severe mental illness: practical and ethical issues raised. *Lancet Oncol*2010;11(8):797-804.
7. Cunningham R, Sarfati D, Stanley J, et al. Cancer survival in the context of mental illness: a national cohort study. *Gen Hosp Psychiatry*2015;37:501-506.
8. Holt RI, Mitchell AJ. Diabetes mellitus and severe mental illness: mechanisms and clinical implications. *Nat Rev Endocrinol*2015;11:79-89.
9. Mulligan K, McBain H, Lamontagne-Godwin F, et al. Barriers and enablers of type 2 diabetes self-management in people with severe mental illness. *Health Expect*2017; doi:10.1111/hex.12543.
10. World Health Organization - Department of Noncommunicable Disease Surveillance. Definition, diagnosis and classification of diabetes mellitus and its complications: Report of a WHO consultation. Part 1, Diagnosis and classification of diabetes mellitus. Geneva, Switzerland: World Health Organization 1999;WHO/NCD/NCS/99.2.
11. Royal College of Psychiatrists. Report of the Second Round of the National Audit of Schizophrenia (NAS). London: Healthcare Quality Improvement Partnership 2014.

12. Woodhead C, Cunningham R, Ashworth M, et al. Cervical and breast cancer screening uptake among women with serious mental illness: A data linkage study. *BMC Cancer*2016;16(1):819.
13. Aggarwal A, Pandurangi A, Smith W. Disparities in breast and cervical cancer screening in women with mental illness: a systematic literature review. *Am J Prev Med*2013;44(4):392–8.
14. Weinstein LC, LaNoue M, Hurley K, et al. Using Concept Mapping to Explore Barriers and Facilitators to Breast Cancer Screening in Formerly Homeless Women with Serious Mental Illness. *Journal of Health Care for the Poor and Underserved*2015;26,3,908-925.
15. Mitchell AJ, Espirito I, Pereira S, et al. Breast cancer screening in women with mental illness: comparative meta-analysis of mammography uptake. *Br J Psychiatry*2014;205(6):428-435.
16. Camilloni L, Ferroni E, Cendales BJ, et al. Methods to increase participation in organised screening programs: a systematic review. *BMC public health*2013;13:464.
17. Barley EA, Borschmann RD, Walters P, et al. Interventions to encourage uptake of cancer screening for people with severe mental illness. *Cochrane Database Syst Rev*2016;Issue9.Art.No.:CD009641.
18. Clifton A, Burgess C, Clement S, et al. Influences on Uptake of Cancer Screening in Mental Health Service Users: A Qualitative Study. *BMC Health Serv Res*2016;16,257.
19. Pawson R, Greenhalgh T, Harvey G, et al. Realist review—a new method of systematic review designed for complex policy interventions. *J Health Serv Res Policy*2005;10(suppl 1),21-34.
20. Holland C, Cooper Y, Shaw R, et al. Effectiveness and uptake of screening programmes for coronary heart disease and diabetes: a realist review of design components used in interventions. *BMJ Open*2013;3:e003428.
21. Wong G, Westhorp G, Manzano A, et al. RAMESES II reporting standards for realist evaluations. *BMC Med*2016;14(1).
22. Public Health England. NHS population screening explained. Population screening programmes - Screening and quality assurance. London: Public Health England 2013;2.
23. Tosh G, Clifton AV, Xia J, et al. Physical health care monitoring for people with serious mental illness. *Cochrane Database Syst Rev*2014;Issue 1.
24. Barley E, Burgess C, Clement S, et al. Uptake of physical health screening in people with severe mental illness: a realist review. *PROSPERO*2016;CRD42016047848.
25. Ferrara M, Mungai F, Miselli M, et al. Starace F. Strategies to implement physical health monitoring in people affected by severe mental illness: a literature review and introduction to the Italian adaptation of the Positive Cardiometabolic Health Algorithm. *Journal of Psychopathology*2015;21:269-280.
26. Hardy S, Gray R. Is the use of an invitation letter effective in prompting patients with severe mental illness to attend a primary care physical health check? *Prim Health Care Res Dev*2012;13:347-52.
27. Hardy S, Deane K, Gray R. The Northampton Physical Health and Wellbeing Project: the views of patients with severe mental illness about their physical health check. *Ment Health Fam Med*2012;9:233-40.
28. Bressington D, Mui J, Hulbert S, et al. Enhanced physical health screening for people with severe mental illness in Hong Kong: results from a one-year prospective case series study. *BMC Psychiatry*2014;14(57).
29. Heyding RK, Cheung AM, Mocarski EJM, et al. A Community-Based Intervention to Increase Screening Mammography Among Disadvantaged Women at an Inner-City Drop-In Center. *Women Health*2005;41(1):21-31.
30. Xiong GL, Bermudes RA, Torres SN, et al. Use of Cancer-Screening Services Among Persons with Serious Mental Illness in Sacramento County. *Psychiatr Serv*2008;59(8):929–32.
31. Millar HL. Development of a Health Screening Clinic. *Eur Psychiatry*2010;25,S29-S33.
32. Kioko E, Williams K, Newhouse B. Improving Metabolic Syndrome Screening on Patients on Second Generation Antipsychotic Medication. *Arch Psychiatr Nurs*2016;30(6).

33. Castillo EG, Rosati J, Williams C, et al. Metabolic Syndrome Screening and Assertive Community Treatment: A Quality Improvement Study. *J Am Psychiatr Nurses Assoc*2015;21(4):233–243.
34. Gonzalez C, Ahammed N, Fisher R. Improving physical health monitoring for out-patients on antipsychotic medication. *Psychiatrist*2010;34:91-94.
35. Hardy S, Hinks P, Gray R. Does training practice nurses to carry out physical health checks for people with severe mental illness increase the level of screening for cardiovascular risk? *Int J Soc Psychiatry*2014;60(3):236–242.
36. Shuel F, White J, Jones M. et al. Using the serious mental illness health improvement profile [HIP] to identify physical problems in a cohort of community patients: A pragmatic case series evaluation. *Int J Nurs Stud*2010;47:136–145.
37. Vasudev K, Thakkar PB, Mitcheson N. Physical health of patients with severe mental illness: an intervention on medium secure forensic unit. *Int J Health Care Qual Assur*2012;25(4):363-70.
38. Wiechers IR, Stoklosa J, Henderson DC. Impact of a Metabolic Screening Bundle on Rates of Screening for Metabolic Syndrome in a Psychiatry Resident Outpatient Clinic. *Acad Psychiatry*2012;36:118–121.
39. Yeomans D, Dale K, Beedle K. Systematic computerised cardiovascular health screening for people with severe mental illness. *Psychiatr Bull*2014;38(6).
40. Abdallah N, Conn R, Latif M, et al. Improving physical health monitoring for patients with chronic mental health problems who receive antipsychotic medications. *BMJ Qual Improv Rep*2016;5(1).
41. Latoo J, Omodunbi O, Hindley D, et al. Physical health of people with severe mental illness: Don't just screen...intervene! *British Journal of Medical Practitioners*2015;8(3):a821.
42. Vasudev K, Martindale BV. Physical healthcare of people with severe mental illness: everybody's business! *Ment Health Fam Med*2010;7(2):115-122.
43. Thompson A, Hetrick SE, Ivarez-Jiménez M, et al. Targeted intervention to improve monitoring of antipsychotic-induced weight gain and metabolic disturbance in first episode psychosis. *Aust N Z J Psychiatry*2011;45:740–748.
44. Druss BG, von Esenwein SA, Compton MT, et al. A Randomized Trial of Medical Care Management for Community Mental Health Settings: The Primary Care Access, Referral, and Evaluation (PCARE) Study. *Am J Psychiatry*2010;167:151–159.
45. Osborn DP, Irwin N, Wright CA, et al. Impact of a nurse-led intervention to improve screening for cardiovascular risk factors in people with severe mental illnesses. Phase-two cluster randomised feasibility trial of community mental health teams. *BMC Health Serv Res*2010;10(61).
46. Rosenbaum S, Nijjar S, Watkins A, et al. Nurse-assessed metabolic monitoring: A file audit of risk factor prevalence and impact of an intervention to enhance measurement of waist circumference. *Int J Ment Health Nurs*2014;23:252–256.
47. DelMonte MT, Bostwick JR, Bess JD, et al. Evaluation of a computer-based intervention to enhance metabolic monitoring in psychiatry inpatients treated with second-generation antipsychotics. *J Clin Pharm Ther*2012;37:668–673.
48. Wilson E, Randall C, Patterson S, et al. Monitoring and management of metabolic abnormalities: mixed-method evaluation of a successful intervention. *Australas Psychiatry*2014;22(3):248–253.
49. Higgins JP, Altman DG, Gøtzsche PC, et al. The Cochrane Collaboration's tool for assessing risk of bias in randomized trials. *BMJ*2011;343:d5928.
50. von Elm E, Altman DG, Egger M, et al. The Strengthening the Reporting of Observational Studies in Epidemiology (STROBE) statement: guidelines for reporting observational studies. *Ann Intern Med*2007;147:573–577.

- 1
- 2
- 3 51. Sanderson S, Tatt ID, Higgins JP. Tools for assessing quality and susceptibility to bias in
- 4 observational studies in epidemiology: a systematic review and annotated bibliography. *Int J*
- 5 *Epidemiol*2007;36(3):666-76.
- 6 52. Armstrong R, Campbell M, Craig P, et al. Reporting guidelines for population health and
- 7 policy interventions: TIDieR-PHP. *Lancet*2015;386(Supp 2),S19.
- 8 53. Anderson R. New MRC Guidance on Evaluating Complex Interventions. *BMJ*2008;337:7676.
- 9
- 10
- 11
- 12
- 13
- 14
- 15
- 16
- 17
- 18
- 19
- 20
- 21
- 22
- 23
- 24
- 25
- 26
- 27
- 28
- 29
- 30
- 31
- 32
- 33
- 34
- 35
- 36
- 37
- 38
- 39
- 40
- 41
- 42
- 43
- 44
- 45
- 46
- 47
- 48
- 49
- 50
- 51
- 52
- 53
- 54
- 55
- 56
- 57
- 58
- 59
- 60

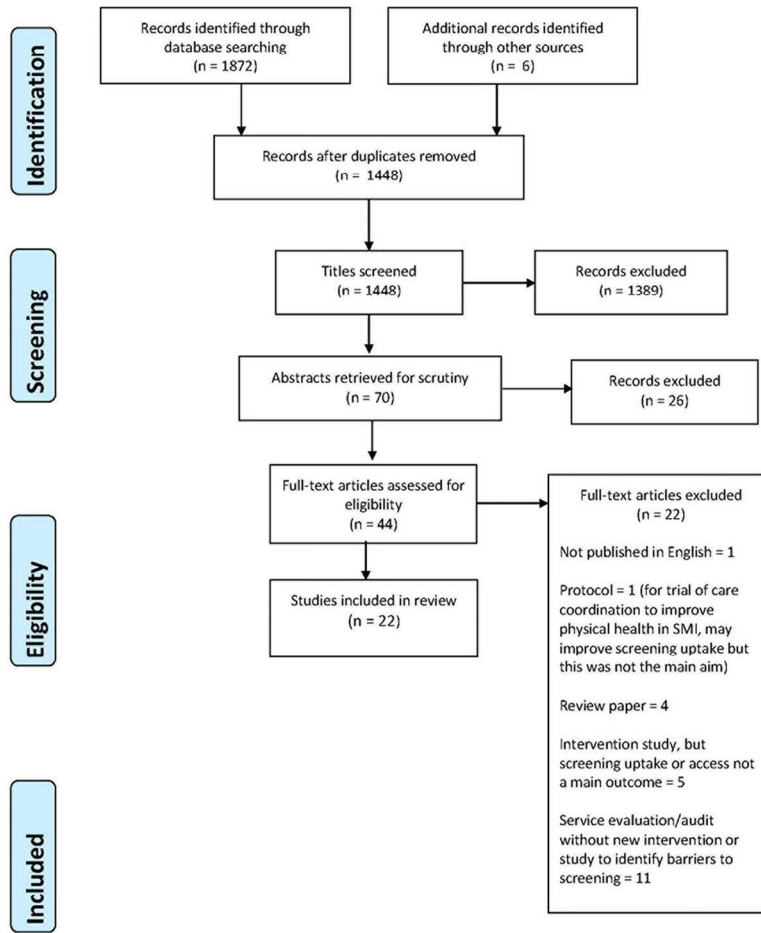

Figure 1. PRISMA Flow Diagram of intervention studies included and excluded from this review

104x147mm (300 x 300 DPI)



## Appendix

### 1. Search terms used in search strategy

The following terms will be used in all data sources: (cardiovascular OR vascular OR CVD OR 'chronic heart disease' OR 'coronary heart disease' OR CHD OR diabetes OR metabolic OR aneurysm) OR cancer OR neoplasm OR carcinoma OR maligna\* OR \*tumour OR tumor OR breast OR mammogra\* OR bowel OR cervical OR pap\*) OR (dental OR dentist OR tooth OR teeth) OR (eye OR retinopathy) AND ('mass screening' OR surveillance\*) OR "Screening Test" OR ((cholesterol OR fecal OR faecal OR blood OR HIV OR sig-moid OR tuberculosis) AND test\*) OR "health check\*" AND (letter OR mail\* OR phone OR telephone OR 'reminder system\*' OR 'videotape recording\*' OR 'audiotape recording\*' OR questionnaire\* OR strateg\* OR alert\* OR hotline OR community OR media) AND (intervention\* OR goal OR 'behav\* change' OR 'implementation intention\*' OR plans OR planned OR planning OR plan OR educat\* OR campaign\* OR barriers OR intention\* OR 'behav\* outcome' OR outcome OR 'lifestyle change' OR longitudinal OR 'follow up' OR motivation\*) AND (satisf\* OR dropout\* OR 'drop out' OR attrition OR uptak\* OR adher\* OR compliance OR complie\* OR comply\* OR 'patient acceptance of health care' OR encourag\* OR improve\* OR improving OR increas\* OR promot\* OR particip\* OR nonattend\* OR 'non attend' OR accept\* OR attend\* OR attitud\* OR utilisation OR utilization OR refus\* OR respond\* OR respons\* OR reluctan\* OR nonrespon\* OR 'non respon\*' OR incidence OR prevalence OR prevalence OR satisfaction OR cooperat\* OR 'co operat\*') AND ('severe mental illness' OR 'mental illness' OR schizophrenia OR catatonic OR paranoid OR disorganized OR disorganised OR bipolar OR manic OR psychosis OR psychotic OR psychiatric OR schizophrenic OR SMI)

**Table 1: Tools to facilitate screening**

| Study                           | Year | Country   | Population Studied                            | Intervention                                                                                                          | Screening                                                                                                                                                                                                                                             |                                                                                                                       |                                                                                                      | Method(s) applied                                                                                                                                  | Results                                                                                                                                                                                                                                                                                            | Main study weaknesses                                |
|---------------------------------|------|-----------|-----------------------------------------------|-----------------------------------------------------------------------------------------------------------------------|-------------------------------------------------------------------------------------------------------------------------------------------------------------------------------------------------------------------------------------------------------|-----------------------------------------------------------------------------------------------------------------------|------------------------------------------------------------------------------------------------------|----------------------------------------------------------------------------------------------------------------------------------------------------|----------------------------------------------------------------------------------------------------------------------------------------------------------------------------------------------------------------------------------------------------------------------------------------------------|------------------------------------------------------|
|                                 |      |           |                                               |                                                                                                                       | Type of screening (targeted or with multiple parameters)                                                                                                                                                                                              | When, how and where in the care pathway was screening offered                                                         | Screening health professional(s) and type of service                                                 |                                                                                                                                                    |                                                                                                                                                                                                                                                                                                    |                                                      |
| Bressington et al <sup>28</sup> | 2014 | Hong Kong | 148 community based psychiatric service users | Training for community psychiatric nurses on how to use the HIP and how to conduct the required physical examinations | The Health improvement screening tool (HIP) contains 27 gender specific items designed to highlight indicators of physical health risk in people with SMI. Items are divided into four categories: measurements, blood tests, screening and lifestyle | The HIP was used as a screening tool at baseline and repeated at 12 months follow-up during routine clinical practice | Community psychiatric nurses trained to use the HIP in a community mental health clinic in Hong Kong | Consecutive prospective case series design<br><br>Pre-post evaluation of structured questionnaire as a screening tool for physical health problems | Significant improvement in self-reported levels of exercise and reduced prescriptions for mean waist circumference increased at follow-up but may be due to measurement error (87.32 to 89.90)<br><br>Lack of deterioration in most areas of cardiovascular risk (BMI mean: 25.79 to 25.66, weight | No randomization, no control group<br>Selection bias |

1  
2  
3  
4  
5  
6  
7  
8  
9  
10  
11  
12  
13  
14  
15  
16  
17  
18  
19  
20  
21  
22  
23  
24  
25  
26  
27  
28  
29  
30  
31  
32  
33  
34  
35  
36  
37  
38  
39  
40  
41  
42  
43  
44  
45  
46

|  |  |  |  |  |  |  |  |  |                                                                                                                                                                                                                                                                                                                                                                                                                           |
|--|--|--|--|--|--|--|--|--|---------------------------------------------------------------------------------------------------------------------------------------------------------------------------------------------------------------------------------------------------------------------------------------------------------------------------------------------------------------------------------------------------------------------------|
|  |  |  |  |  |  |  |  |  | <p>mean: 66.76 to 66.49)</p> <p>Reduction in medicines prescribed for physical health problems: diabetes medication (p = 0.04) and prescriptions for hypertension reduced at follow-up from 21% to 14% of patients</p> <p>General improvements in health behaviours over the 12 month period: 7% increase in number of patients eating sufficient fruit and vegetables, but only exercise improved to a statistically</p> |
|--|--|--|--|--|--|--|--|--|---------------------------------------------------------------------------------------------------------------------------------------------------------------------------------------------------------------------------------------------------------------------------------------------------------------------------------------------------------------------------------------------------------------------------|

For peer review only

|                              |      |     |                                                      |                                                                                           |                                                                                                                                                    |                                                                                                                                                                                                                                                                                   |                                                                                                                                                                                                                                                                                                                                  |                     |                                                                                                                                                                                                                                                                                                          |                                    |
|------------------------------|------|-----|------------------------------------------------------|-------------------------------------------------------------------------------------------|----------------------------------------------------------------------------------------------------------------------------------------------------|-----------------------------------------------------------------------------------------------------------------------------------------------------------------------------------------------------------------------------------------------------------------------------------|----------------------------------------------------------------------------------------------------------------------------------------------------------------------------------------------------------------------------------------------------------------------------------------------------------------------------------|---------------------|----------------------------------------------------------------------------------------------------------------------------------------------------------------------------------------------------------------------------------------------------------------------------------------------------------|------------------------------------|
|                              |      |     |                                                      |                                                                                           |                                                                                                                                                    |                                                                                                                                                                                                                                                                                   |                                                                                                                                                                                                                                                                                                                                  |                     | significant level (p = 0.02)                                                                                                                                                                                                                                                                             |                                    |
| Castillo et al <sup>33</sup> | 2015 | USA | 141 community based assertive outreach service users | Systematic screening protocol for MS and educational sessions for staff and service users | Metabolic syndrome screening (waist circumference, blood pressure, fasting blood glucose, triglycerides, and high density lipoprotein cholesterol) | Blood tests were ordered for metabolic monitoring when clinicians prescribed scheduled second generation antipsychotics (SGAs) to their inpatients. During routine clinical practice, patient waist circumference was measured and blood pressure was measured using the standard | Nurses and psychiatrists working in three Assertive Community Treatment (ACT) teams in New York. ACT social workers and case managers facilitated patient screenings as needed by scheduling and accompanying patients to appointments, arranging transportation and liaising with primary care providers and blood test clinics | Quality Improvement | 75 (53%) participants met criteria for MS<br>Five of these diagnoses came from use of adapted diagnostic criteria using random glucose measurements<br>Of the 66 participants who did not have MS, only 9 had no metabolic risk factors<br>34 met 2 criteria and the remaining 23 met 1 criterion for MS | No randomization, no control group |

1  
2  
3  
4  
5  
6  
7  
8  
9  
10  
11  
12  
13  
14  
15  
16  
17  
18  
19  
20  
21  
22  
23  
24  
25  
26  
27  
28  
29  
30  
31  
32  
33  
34  
35  
36  
37  
38  
39  
40  
41  
42  
43  
44  
45  
46

|                              |      |     |                                                                                                                                                                       |                                                                               |                                                                                                                                                                                               |                                                                                                                                                                         |                                                                                                      |                                                                                              |                                                                                                                                                                                        |                                                      |
|------------------------------|------|-----|-----------------------------------------------------------------------------------------------------------------------------------------------------------------------|-------------------------------------------------------------------------------|-----------------------------------------------------------------------------------------------------------------------------------------------------------------------------------------------|-------------------------------------------------------------------------------------------------------------------------------------------------------------------------|------------------------------------------------------------------------------------------------------|----------------------------------------------------------------------------------------------|----------------------------------------------------------------------------------------------------------------------------------------------------------------------------------------|------------------------------------------------------|
|                              |      |     |                                                                                                                                                                       |                                                                               |                                                                                                                                                                                               | size adult blood pressure cuff available at each ACT site. Measurements were typically conducted in patients' homes                                                     |                                                                                                      |                                                                                              |                                                                                                                                                                                        |                                                      |
| Delmonte et al <sup>47</sup> | 2012 | USA | Service users on SGAs on a general psychiatric inpatient unit – 171 at pre alert and 157 post alert. Patients receiving SGAs on an as-needed basis only were excluded | Use of computerized electronic patient alerts to enhance metabolic monitoring | Metabolic monitoring (fasting blood glucose and lipid). Patient weight, blood pressure, information regarding family history and waist circumference were not collected as part of this study | Prescribers entering an SGA order assess the need for metabolic monitoring, and facilitate ordering of appropriate blood tests directly via the electronic pop-up alert | Clinicians prescribing scheduled SGAs at a University Hospital inpatient psychiatry unit in Michigan | Retrospective chart review of notes and tests ordered to assess for MS Pre-post study design | Significant difference in availability of metabolic monitoring data post intervention: 12.9% to 47.8% in number of service users with both fasting glucose level & fasting lipid panel | No randomization, no control group Open to time bias |

|                              |      |    |                                                                                                                                                                                                                                          |                                                                                                                                                                                                                                                                       |                                                                                                                                                                                                                |                                                                                                                |                                                                              |                                                                                                                                                                                                                   |                                                                                                                                                                                                                                                                           |                                                                                                                                                                                                                                                                                                                                                                    |
|------------------------------|------|----|------------------------------------------------------------------------------------------------------------------------------------------------------------------------------------------------------------------------------------------|-----------------------------------------------------------------------------------------------------------------------------------------------------------------------------------------------------------------------------------------------------------------------|----------------------------------------------------------------------------------------------------------------------------------------------------------------------------------------------------------------|----------------------------------------------------------------------------------------------------------------|------------------------------------------------------------------------------|-------------------------------------------------------------------------------------------------------------------------------------------------------------------------------------------------------------------|---------------------------------------------------------------------------------------------------------------------------------------------------------------------------------------------------------------------------------------------------------------------------|--------------------------------------------------------------------------------------------------------------------------------------------------------------------------------------------------------------------------------------------------------------------------------------------------------------------------------------------------------------------|
| Gonzalez et al <sup>34</sup> | 2010 | UK | Male and female community based service users taking regular antipsychotic medication<br>Inner city London population<br><br>First audit N=126<br>Second audit N=106<br>No significant difference in demographic details of both samples | Local adaptation of clinical guidelines<br>Implementation of monitoring tool: A4 page filed in the patients' records, both as a prompt to doctors regarding their patients' need for the physical monitoring and as an instrument to facilitate later data collection | Blood tests for patients taking first-generation antipsychotics (full blood count, urea and electrolytes, liver function test, thyroid function test, glycosylated haemoglobin, prolactin, glucose and lipids) | Routine blood testing ordered by psychiatrist every six months for patients on first generation antipsychotics | Psychiatrists in an inner city London borough community mental health centre | Retrospective audit of patients' clinical records for physical health monitoring<br><br>Systematic randomization by selecting every 4 <sup>th</sup> file in alphabetical order until 25% of caseload was selected | Post intervention: significant improvement in all tests (glucose: 24.6% to 72.6%, lipids: 7.1% to 52.8%, liver function: 38.9% to 79.2%) except HbA1c (3.2 to 5.7%) and Prolactin (0.8% to 0)<br>Implementation of the monitoring tool achieved in 48% of re-audit sample | No randomization, no control group<br>Did not include other measure for detection of MS and did not include ECG<br>Limited time between audits to allow embedding of the intervention<br>Other factors may have resulted in improvements seen due to increased awareness within the service due to local policy and national guidelines or other potential factors |
| Hardy et al <sup>35</sup>    | 2014 | UK | 400 community based service                                                                                                                                                                                                              | Two-hour training for practice nurses to                                                                                                                                                                                                                              | Screening for cardiovascular (CVD) risk factors (blood                                                                                                                                                         | Screening for CVD risk factors were                                                                            | Practice nurses in five primary care centres in Northampton                  | Repeat audit to monitor how well primary care                                                                                                                                                                     | Training practice nurses on CVD prevention                                                                                                                                                                                                                                | No randomization, no control group                                                                                                                                                                                                                                                                                                                                 |

1  
2  
3  
4  
5  
6  
7  
8  
9  
10  
11  
12  
13  
14  
15  
16  
17  
18  
19  
20  
21  
22  
23  
24  
25  
26  
27  
28  
29  
30  
31  
32  
33  
34  
35  
36  
37  
38  
39  
40  
41  
42  
43  
44  
45  
46

|                           |      |     |                                                         |                                                                                                                                             |                                                                                                                                                             |                                                                       |                                                             |                                                                                  |                                                                                                                                                                                                                                     |                                                                                                                                                                                                                                                                                                                           |
|---------------------------|------|-----|---------------------------------------------------------|---------------------------------------------------------------------------------------------------------------------------------------------|-------------------------------------------------------------------------------------------------------------------------------------------------------------|-----------------------------------------------------------------------|-------------------------------------------------------------|----------------------------------------------------------------------------------|-------------------------------------------------------------------------------------------------------------------------------------------------------------------------------------------------------------------------------------|---------------------------------------------------------------------------------------------------------------------------------------------------------------------------------------------------------------------------------------------------------------------------------------------------------------------------|
|                           |      |     | users with SMI                                          | increase level of screening for cardiovascular disease (CVD) risk factors with lifestyle counselling (health check includes seven elements) | pressure, body mass index (or waist circumference), blood glucose, serum cholesterol, diet advice, exercise recommendations and smoking cessation guidance) | carried out by practice nurses as part of their routine clinical role |                                                             | practitioners are screening people with SMI for CVD following training           | increased number of service users receiving wide ranging health check<br>Pre-training: <i>n</i> = 33, 8% Post-training: <i>n</i> = 60, 15%, <i>p</i> = .01<br>Increase in number of service users receiving lifestyle interventions | Unclear why other 26 primary care centres did not participate<br>Did not look at any other factor (e.g. other training, professional development, targets by the organisation) which could have influenced staff<br>Possible Hawthorne effect and no exploration of whether increased screening improves patient outcomes |
| Kioko et al <sup>32</sup> | 2016 | USA | 100 notes of community mental health service users aged | Recommended MS monitoring and screening tool to improve                                                                                     | Metabolic syndrome screening (blood pressure, weight, height, lipid panel,                                                                                  | During routine consultation at the clinic with patients on SGA, blood | Mental health clinicians in a local community mental health | Pre-post intervention design to evaluate the effectiveness of using a recommende | Percentage of blood tests ordered were 62% post-intervention compared to                                                                                                                                                            | No randomization, no control group<br>Difficulty obtaining waist circumference - parameter                                                                                                                                                                                                                                |

|                           |      |    |                                                                                                     |                                          |                                                                                                                                                                                                                               |                                                                                                                                                                    |                                                                                                                                                                          |                                                                                           |                                                                                                                                                                                                                                              |                                                                                                                                                                          |
|---------------------------|------|----|-----------------------------------------------------------------------------------------------------|------------------------------------------|-------------------------------------------------------------------------------------------------------------------------------------------------------------------------------------------------------------------------------|--------------------------------------------------------------------------------------------------------------------------------------------------------------------|--------------------------------------------------------------------------------------------------------------------------------------------------------------------------|-------------------------------------------------------------------------------------------|----------------------------------------------------------------------------------------------------------------------------------------------------------------------------------------------------------------------------------------------|--------------------------------------------------------------------------------------------------------------------------------------------------------------------------|
|                           |      |    | 19 years and above on second generation antipsychotics                                              | identification of patients at risk of MS | fasting glucose and/or glycated hemoglobin parameters)                                                                                                                                                                        | tests were ordered and vital signs obtained and the results recorded in the patient electronic health system                                                       | facility in a southwestern state                                                                                                                                         | d MS monitoring and screening tool to improve identification of MS risk for service users | 22% pre-intervention                                                                                                                                                                                                                         | frequently omitted<br>Lack of agreement over who is responsible for ordering blood tests and following up results<br>Small sample size - difficult to generalize results |
| Shuel et al <sup>36</sup> | 2010 | UK | 31 community based psychiatric service users<br>9 Mental Health Nurses<br>4 Psychiatrists<br>12 GPs | Paper sheet screening instrument (HIP)   | The Health improvement screening tool (HIP) contains 27 gender specific items designed to highlight indicators of physical health risk in people with SMI. Items are divided into four categories: measurements, blood tests, | The HIP was filled out during a consultation with patients on antipsychotics who were invited to attend an outpatient medication management clinic at the hospital | Mental health nurses trained to use the HIP in a nurse-led outpatient medication management clinic, for community adult patients with serious mental illness in Scotland | Retrospective audit of patient and clinician views using semi-structured interviews       | Thirty-one patients participated in Audit<br>Mean number of parameters per patient requiring intervention was 6.1 and a total of 189 physical health issues were identified<br>At least one physical health issue was identified per patient | No randomization, no control group<br>One-year FU assessment planned to assess changes in modifiable factors identified by the HIP                                       |



|                             |      |    |                                                                                                                |                                                                                                  |                                                                                                                                                                                        |                                                                                               |                                                                                                                                                                                       |                                                                    |                                                                                                                                                                                                        |                                                                                                                                                |
|-----------------------------|------|----|----------------------------------------------------------------------------------------------------------------|--------------------------------------------------------------------------------------------------|----------------------------------------------------------------------------------------------------------------------------------------------------------------------------------------|-----------------------------------------------------------------------------------------------|---------------------------------------------------------------------------------------------------------------------------------------------------------------------------------------|--------------------------------------------------------------------|--------------------------------------------------------------------------------------------------------------------------------------------------------------------------------------------------------|------------------------------------------------------------------------------------------------------------------------------------------------|
|                             |      |    |                                                                                                                |                                                                                                  | screening and lifestyle                                                                                                                                                                |                                                                                               |                                                                                                                                                                                       |                                                                    | High prevalence of obesity, poor diet (41% of patients) and lack of exercise<br>14 referrals for potentially serious conditions including raised glucose and lipids, hypertension and cardiac problems |                                                                                                                                                |
| Vasudev et al <sup>37</sup> | 2012 | UK | 15 male inpatients on a medium secure forensic psychiatric rehab unit diagnosed with SMI and on antipsychotics | Introduction of a physical health monitoring sheet by the Trust to prompt staff to do the checks | Physical health monitoring (weight, BMI, waist circumference, BP, results of blood tests and ECG, diabetic status if suffering from cardiovascular disease, smoking status, calculated | Six-monthly physical health monitoring of all patients in a secure long stay psychiatric unit | The key nurse took responsibility for completing the section on weight, BMI, waist circumference, BP and smoking status while the rest of the information was completed by the junior | Pre-post audit of physical health monitoring (twelve months apart) | At re-audit of 100% of service users had up to date records on the physical health monitoring sheet<br>At follow-up increased number of service users prescribed hypolipidaemic agents<br>Significant  | No randomization, no control group<br>Small male-only sample<br>Type of ward and environment could influence patient engagement and motivation |

|                              |      |     |                                                                                                            |                                                                                                                                                          |                                                                                    |                                                                                                                                                                                         |                                                                                 |                                                                                                                              |                                                                                                                                                                                                                                       |                                                                                                                                                                                                                                                                                                                                                 |
|------------------------------|------|-----|------------------------------------------------------------------------------------------------------------|----------------------------------------------------------------------------------------------------------------------------------------------------------|------------------------------------------------------------------------------------|-----------------------------------------------------------------------------------------------------------------------------------------------------------------------------------------|---------------------------------------------------------------------------------|------------------------------------------------------------------------------------------------------------------------------|---------------------------------------------------------------------------------------------------------------------------------------------------------------------------------------------------------------------------------------|-------------------------------------------------------------------------------------------------------------------------------------------------------------------------------------------------------------------------------------------------------------------------------------------------------------------------------------------------|
|                              |      |     |                                                                                                            |                                                                                                                                                          | cardiovascular risk over the next ten years, and use of alcohol in units per week) |                                                                                                                                                                                         | doctor in a male medium secure forensic psychiatric rehabilitation unit         |                                                                                                                              | reduction in CVD risk at follow up                                                                                                                                                                                                    |                                                                                                                                                                                                                                                                                                                                                 |
| Wiechers et al <sup>38</sup> | 2012 | USA | 206 adult service users of a psychiatric resident outpatient clinic who were prescribed any antipsychotics | Metabolic Screening Bundle template<br>Three one-hour education sessions conducted to review antipsychotic medication-associated metabolic abnormalities | Metabolic syndrome screening (blood pressure, BMI, glucose and lipid panel)        | Documentation in the last 12 months of any individual element of the Metabolic Screening Bundle (blood pressure, BMI, glucose and lipid panel) for patients on antipsychotic medication | Psychiatry residents in an academic medical centre outpatient psychiatry clinic | Audits of the Electronic Medical Record completed at baseline and each quarter for the following year<br>Quality Improvement | Rates component parts of the Metabolic Screening Bundle in the preceding 12 months increased from baseline audit through the Quarter 4 audit: BMI 5% to 44%; BP 4% to 39%; Fasting glucose 15% to 55%; Fasting lipid panel 14% to 55% | No randomization, no control group<br>Chart audit unable to capture undocumented results/results documented other than psychiatry notes that may have been reviewed by the resident but not remarked on in the progress note<br>Unclear whether gains made with intervention and cohort of residents can be sustained without a dedicated group |

1  
2  
3  
4  
5  
6  
7  
8  
9  
10  
11  
12  
13  
14  
15  
16  
17  
18  
19  
20  
21  
22  
23  
24  
25  
26  
27  
28  
29  
30  
31  
32  
33  
34  
35  
36  
37  
38  
39  
40  
41  
42  
43  
44  
45  
46

|                             |      |    |                                                    |                                                                                                                                           |                                                                                                                    |                                                                                |                                                                              |                                                                                             |                                                                                                                                                                                                     |                                                                                                                                                                                                                                                                                                                                                                     |
|-----------------------------|------|----|----------------------------------------------------|-------------------------------------------------------------------------------------------------------------------------------------------|--------------------------------------------------------------------------------------------------------------------|--------------------------------------------------------------------------------|------------------------------------------------------------------------------|---------------------------------------------------------------------------------------------|-----------------------------------------------------------------------------------------------------------------------------------------------------------------------------------------------------|---------------------------------------------------------------------------------------------------------------------------------------------------------------------------------------------------------------------------------------------------------------------------------------------------------------------------------------------------------------------|
|                             |      |    |                                                    |                                                                                                                                           |                                                                                                                    |                                                                                |                                                                              |                                                                                             |                                                                                                                                                                                                     | of residents<br>championing<br>change                                                                                                                                                                                                                                                                                                                               |
| Yeomans et al <sup>39</sup> | 2014 | UK | 335 service users on the primary care SMI register | GP practices received 30-minute staff training on how to use a computerized physical screening template designed for annual health checks | Physical health review (systolic blood pressure, BMI, high-density lipoprotein: cholesterol ratio, smoking status) | Annual physical health review performed in primary care during annual check up | GPs performed the review in primary care in the Bradford and Airedale region | Retrospective evaluation of computerized template designed for annual physical health check | 23% service users with a computerized template review had data rich QRisk2 compared QRisk2 scores above 20% seen in 3.9% of template based reviews Use of template increased detection risk for CVD | No randomization, no control group Method dependent on accurate record keeping and clinician behaviour No record of unrecorded activity taking place which would contribute to annual patient review GPs selected patients for review: possible bias acknowledged but considered unlikely Quality and Outcomes Framework incentive for annual health checks removed |

1  
2  
3  
4  
5  
6  
7  
8  
9  
10  
11  
12  
13  
14  
15  
16  
17  
18  
19  
20  
21  
22  
23  
24  
25  
26  
27  
28  
29  
30  
31  
32  
33  
34  
35  
36  
37  
38  
39  
40  
41  
42  
43  
44  
45  
46

|  |  |  |  |  |  |  |  |  |  |  |                           |
|--|--|--|--|--|--|--|--|--|--|--|---------------------------|
|  |  |  |  |  |  |  |  |  |  |  | and replaced by<br>CQUIN. |
|--|--|--|--|--|--|--|--|--|--|--|---------------------------|

For peer review only

1  
2  
3  
4  
5  
6  
7  
8  
9  
10  
11  
12  
13  
14  
15  
16  
17  
18  
19  
20  
21  
22  
23  
24  
25  
26  
27  
28  
29  
30  
31  
32  
33  
34  
35  
36  
37  
38  
39  
40  
41  
42  
43  
44  
45  
46

**Table 2: Studies of health service delivery changes**

| First Author                 | Year | Country | Population Studied                                       | Intervention                                       | Screening                                                                                                                                                                                               |                                                                                                                     |                                                                                                                                                                                      | Method(s) applied   | Results                                                                                                                                                                                                                                                                        | Main study weaknesses                                                                                                                                                                          |
|------------------------------|------|---------|----------------------------------------------------------|----------------------------------------------------|---------------------------------------------------------------------------------------------------------------------------------------------------------------------------------------------------------|---------------------------------------------------------------------------------------------------------------------|--------------------------------------------------------------------------------------------------------------------------------------------------------------------------------------|---------------------|--------------------------------------------------------------------------------------------------------------------------------------------------------------------------------------------------------------------------------------------------------------------------------|------------------------------------------------------------------------------------------------------------------------------------------------------------------------------------------------|
|                              |      |         |                                                          |                                                    | Type of screening (targeted or with multiple parameters )                                                                                                                                               | When, how and where in the care pathway was screening offered                                                       | Screening health professional(s) and type of service                                                                                                                                 |                     |                                                                                                                                                                                                                                                                                |                                                                                                                                                                                                |
| Abdallah et al <sup>40</sup> | 2016 | UK      | 95 service users with schizophrenia living in care homes | Patient education and education of care home staff | Physical health monitoring (blood workup, liver function test, urea and Electrolytes , full blood count, fasting blood glucose, blood lipid, HbA1c, prolactin, blood pressure/pulse/weight measurement) | Physical health screening was offered during the Care Programme Approach review (held every six months to one year) | Screening was done by GPs. Patients were attached to the Haringey Community Rehabilitation team (multidisciplinary care coordination team that includes mental health nurses, social | Quality Improvement | Improvement in culture within care home where staff and service users actively participated in physical health monitoring Blood pressure and weight measured in 68% of patients compared to 10% and 0 at baseline 55% of patients had pulse measured compared to 0 at baseline | No randomization, no control group<br><br>Small sample, difficult to determine results as in later PDSA cycles the interventions did not target only the patient group included in the results |

|                           |      |     |                                                          |                                                                                                                                                                                                                       |                                                                                                                                                                                                                                |                                                                                                                                                                                                                 |                                                                                                                                             |                          |                                                                                                                                                                                                                                                                                      |                                                                                                                                                                                                                                                                                                                                         |
|---------------------------|------|-----|----------------------------------------------------------|-----------------------------------------------------------------------------------------------------------------------------------------------------------------------------------------------------------------------|--------------------------------------------------------------------------------------------------------------------------------------------------------------------------------------------------------------------------------|-----------------------------------------------------------------------------------------------------------------------------------------------------------------------------------------------------------------|---------------------------------------------------------------------------------------------------------------------------------------------|--------------------------|--------------------------------------------------------------------------------------------------------------------------------------------------------------------------------------------------------------------------------------------------------------------------------------|-----------------------------------------------------------------------------------------------------------------------------------------------------------------------------------------------------------------------------------------------------------------------------------------------------------------------------------------|
|                           |      |     |                                                          |                                                                                                                                                                                                                       | ent, BMI, waist circumference)                                                                                                                                                                                                 |                                                                                                                                                                                                                 | workers, psychiatrists, psychologists, and mental health care assistants)                                                                   |                          | 68% had bloods done compared to 0 at baseline                                                                                                                                                                                                                                        |                                                                                                                                                                                                                                                                                                                                         |
| Druss et al <sup>44</sup> | 2010 | USA | 407 service users with SMI under care of community teams | Participants with SMI at an urban community mental health centre were randomly assigned to either the medical care management intervention or usual care. For individual participants in the intervention group, care | 23 indicators drawn from the U.S. Preventive Services Task Force guidelines were included across the following four domains: 1) physical examination (blood pressure, eye, height/weight, oral, breast, mammogram, and pelvic) | Care managers supported patients to get screened by providing communication and advocacy with medical providers, health education, and support in overcoming system-level fragmentation and barriers to primary | Care managers (registered nurses) assisted patients from an urban community mental health centre in Atlanta to access primary care services | Randomized Control Trial | 12-month follow-up evaluation: intervention group received average 58.7% of recommended preventive services compared with 21.8% in usual care. Significantly higher proportion of evidence-based services for cardio-metabolic conditions (34.9% versus 27.7%). Higher likelihood to | Low risk of bias (Performance bias as control group - treatment as usual - not blinded). Broad entry criteria limited the statistical power to examine outcomes for individual medical conditions. Study was conducted in a single site so replication would be needed to fully assess generalizability to different types of community |

1  
2  
3  
4  
5  
6  
7  
8  
9  
10  
11  
12  
13  
14  
15  
16  
17  
18  
19  
20  
21  
22  
23  
24  
25  
26  
27  
28  
29  
30  
31  
32  
33  
34  
35  
36  
37  
38  
39  
40  
41  
42  
43  
44  
45  
46

|  |  |  |  |                                                                                                                                                                                  |                                                                                                                                                                                                                                                                             |              |  |  |                                                                                                                                                                                                                                                                                                                                 |                        |
|--|--|--|--|----------------------------------------------------------------------------------------------------------------------------------------------------------------------------------|-----------------------------------------------------------------------------------------------------------------------------------------------------------------------------------------------------------------------------------------------------------------------------|--------------|--|--|---------------------------------------------------------------------------------------------------------------------------------------------------------------------------------------------------------------------------------------------------------------------------------------------------------------------------------|------------------------|
|  |  |  |  | managers provided communication and advocacy with medical providers, health education, and support in overcoming system-level fragmentation and barriers to primary medical care | 2) screening tests (cholesterol, fecal blood, HIV, sigmoid, and tuberculosis) 3) vaccinations (influenza, hepatitis B, measles, mumps, and rubella, pneumococcal bacterial infection, tetanus-diphtheria, and varicella) 4) education (exercise, self-examination, smoking, | medical care |  |  | have primary care provider (71.2% versus 51.9%) Intervention group showed significant improvement on SF-36 mental health component summary (8.0% [versus a 1.1% decline in the usual care group]) Scores on Framingham Cardiovascular Risk Index significantly better in intervention group (6.9%) than usual care group (9.8%) | mental health settings |
|--|--|--|--|----------------------------------------------------------------------------------------------------------------------------------------------------------------------------------|-----------------------------------------------------------------------------------------------------------------------------------------------------------------------------------------------------------------------------------------------------------------------------|--------------|--|--|---------------------------------------------------------------------------------------------------------------------------------------------------------------------------------------------------------------------------------------------------------------------------------------------------------------------------------|------------------------|

|                            |      |    |                                                                                                       |                                                                                                                                                                                                                                                             |                                                                                                                                                                                                                                                          |                                                                                                                                                                         |                                 |                     |                                                                                                                                                                               |                                                                                                            |  |
|----------------------------|------|----|-------------------------------------------------------------------------------------------------------|-------------------------------------------------------------------------------------------------------------------------------------------------------------------------------------------------------------------------------------------------------------|----------------------------------------------------------------------------------------------------------------------------------------------------------------------------------------------------------------------------------------------------------|-------------------------------------------------------------------------------------------------------------------------------------------------------------------------|---------------------------------|---------------------|-------------------------------------------------------------------------------------------------------------------------------------------------------------------------------|------------------------------------------------------------------------------------------------------------|--|
|                            |      |    |                                                                                                       |                                                                                                                                                                                                                                                             | nutrition,<br>and weight)                                                                                                                                                                                                                                |                                                                                                                                                                         |                                 |                     |                                                                                                                                                                               |                                                                                                            |  |
| Hardy & Gray <sup>26</sup> | 2012 | UK | 92 community service users with severe and enduring mental illness<br>338 service users with diabetes | Retrospective comparison of response rate of patients with SMI and diabetes to an invitation appointment letter to attend a primary care health check<br>Patients with SMI sent an appointment at a predetermined time and date.<br>Annual health check for | HIP for primary care: review of any pre-existing comorbid physical health problems, screening for emergent diabetes, hypertension and dyslipidaemia, initiation of appropriate treatment for newly diagnosed conditions, providing information about co- | Patients with SMI were sent an appointment letter 10 days before the appointment inviting them to attend a primary care health check with a predetermined date and time | Practice nurses in primary care | Retrospective audit | 66% service users with SMI attended appointment<br>81% service users with diabetes attended appointment<br>Service users with diabetes 2.2 more likely to attend health check | No randomization, no control group<br><br>Unclear if sample reflects whole population of SMI (or diabetes) |  |



1  
2  
3  
4  
5  
6  
7  
8  
9  
10  
11  
12  
13  
14  
15  
16  
17  
18  
19  
20  
21  
22  
23  
24  
25  
26  
27  
28  
29  
30  
31  
32  
33  
34  
35  
36  
37  
38  
39  
40  
41  
42  
43  
44  
45  
46

|  |  |  |  |                                             |                                                                                                                                                                                                                                                                     |  |  |  |  |  |
|--|--|--|--|---------------------------------------------|---------------------------------------------------------------------------------------------------------------------------------------------------------------------------------------------------------------------------------------------------------------------|--|--|--|--|--|
|  |  |  |  | patients with SMI followed the HIP guidance | occurring physical health problems, lifestyle advice (diet, exercise, smoking, alcohol, sex and guidance about self-examination (breast, testicles)), prompt that eyes and teeth have been tested/checked; review of psychotropic medication and side effect check. |  |  |  |  |  |
|--|--|--|--|---------------------------------------------|---------------------------------------------------------------------------------------------------------------------------------------------------------------------------------------------------------------------------------------------------------------------|--|--|--|--|--|

For peer review only

|                                                                                                                                                                                                                                                                         |                             |      |        |                                                                                                                 |                                                                                                                                                                                                                             |                       |                                                                                                                                        |                                                                                                                                                                                                                                                                                       |                                                                                |                                                                      |                                                                                                                                                                                                              |
|-------------------------------------------------------------------------------------------------------------------------------------------------------------------------------------------------------------------------------------------------------------------------|-----------------------------|------|--------|-----------------------------------------------------------------------------------------------------------------|-----------------------------------------------------------------------------------------------------------------------------------------------------------------------------------------------------------------------------|-----------------------|----------------------------------------------------------------------------------------------------------------------------------------|---------------------------------------------------------------------------------------------------------------------------------------------------------------------------------------------------------------------------------------------------------------------------------------|--------------------------------------------------------------------------------|----------------------------------------------------------------------|--------------------------------------------------------------------------------------------------------------------------------------------------------------------------------------------------------------|
| 1<br>2<br>3<br>4<br>5<br>6<br>7<br>8<br>9<br>10<br>11<br>12<br>13<br>14<br>15<br>16<br>17<br>18<br>19<br>20<br>21<br>22<br>23<br>24<br>25<br>26<br>27<br>28<br>29<br>30<br>31<br>32<br>33<br>34<br>35<br>36<br>37<br>38<br>39<br>40<br>41<br>42<br>43<br>44<br>45<br>46 | Heyding et al <sup>29</sup> | 2005 | Canada | Disadvantaged women aged 50-70 who attended inner-city drop-in centre (N = 158 in 1995-2001 and N = 89 in 2002) | Drop-in centre and nearby hospital in Toronto initiated collaborative breast cancer screening project in which staff of drop-in centre accompanied small groups of women for mammography visits at weekly pre-arranged time | Screening mammography | A staff member of the drop-in centre accompanied small groups of women aged 50-70 for mammography visits at a weekly pre-arranged time | Staff member of an inner-city drop-in centre in Toronto accompanied small groups of women to St. Michael's hospital women's health care centre for mammography screening. A family physician working at the drop-in centre served as the referring physician requesting the mammogram | Pre-post audit Comparison between screening before and after intervention year | Increase from average of 4.7% women receiving a mammography to 29.2% | No randomization, no control group<br><br>Observational rather than experimental design<br><br>Limited control over extraneous variables<br><br>Audited documentation may have been inaccurate or incomplete |
|-------------------------------------------------------------------------------------------------------------------------------------------------------------------------------------------------------------------------------------------------------------------------|-----------------------------|------|--------|-----------------------------------------------------------------------------------------------------------------|-----------------------------------------------------------------------------------------------------------------------------------------------------------------------------------------------------------------------------|-----------------------|----------------------------------------------------------------------------------------------------------------------------------------|---------------------------------------------------------------------------------------------------------------------------------------------------------------------------------------------------------------------------------------------------------------------------------------|--------------------------------------------------------------------------------|----------------------------------------------------------------------|--------------------------------------------------------------------------------------------------------------------------------------------------------------------------------------------------------------|

1  
2  
3  
4  
5  
6  
7  
8  
9  
10  
11  
12  
13  
14  
15  
16  
17  
18  
19  
20  
21  
22  
23  
24  
25  
26  
27  
28  
29  
30  
31  
32  
33  
34  
35  
36  
37  
38  
39  
40  
41  
42  
43  
44  
45  
46

|                           |      |    |                                                                                         |                                                                                                                               |                                                                                                                                                                                                                                                                            |                                                                                                                                                                                                                                                                                                            |                                                                                                                                                                                                                                                                         |                                                                                              |                                                                                                                                                                                                                                           |                                                                                          |
|---------------------------|------|----|-----------------------------------------------------------------------------------------|-------------------------------------------------------------------------------------------------------------------------------|----------------------------------------------------------------------------------------------------------------------------------------------------------------------------------------------------------------------------------------------------------------------------|------------------------------------------------------------------------------------------------------------------------------------------------------------------------------------------------------------------------------------------------------------------------------------------------------------|-------------------------------------------------------------------------------------------------------------------------------------------------------------------------------------------------------------------------------------------------------------------------|----------------------------------------------------------------------------------------------|-------------------------------------------------------------------------------------------------------------------------------------------------------------------------------------------------------------------------------------------|------------------------------------------------------------------------------------------|
| Latoo et al <sup>41</sup> | 2015 | UK | 52-55 service users receiving antipsychotics in Early intervention in Psychosis service | Advancing Quality Alliance design to examine six physical parameters: weight, height, BMI, BP, blood glucose and serum lipids | Comprehensive physical assessment (serum lipid profile, blood glucose, body weight, height, BMI and blood pressure). Other information was collected such as smoking, diet, exercise, sexual health, sleep, dental and optical health, ECGs and other routine blood checks | Notification list alerted on the computer when screening was due. Access to blood tests for both localities was established to help facilitate prompt access to blood results. Wellbeing nurse-led clinics were held in Halton and a social worker- led physical health clinic was initiated in Warrington | Patients were recruited from the Warrington and Halton Early Intervention in Psychosis Service. Screening took place in primary care and physical health clinics (wellbeing nurse-led clinics in Halton and a social worker- led physical health clinic in Warrington ) | Retrospective review of clinical records following improvement in physical health monitoring | Screening and monitoring of six parameters: At 4 weeks 29 patients recorded screening, 19 (66%) of which had six types of screening. At 24 months, out of 16 patients who had their screening recorded, 15 (95%) had 6 types of screening | No control group<br><br>No randomized design to test new screening and assessment method |
|---------------------------|------|----|-----------------------------------------------------------------------------------------|-------------------------------------------------------------------------------------------------------------------------------|----------------------------------------------------------------------------------------------------------------------------------------------------------------------------------------------------------------------------------------------------------------------------|------------------------------------------------------------------------------------------------------------------------------------------------------------------------------------------------------------------------------------------------------------------------------------------------------------|-------------------------------------------------------------------------------------------------------------------------------------------------------------------------------------------------------------------------------------------------------------------------|----------------------------------------------------------------------------------------------|-------------------------------------------------------------------------------------------------------------------------------------------------------------------------------------------------------------------------------------------|------------------------------------------------------------------------------------------|

|                                                                                                                                                                                                                                                                         |                      |      |    |                                                                                                                     |                                                                                                                                                                                    |                                                                                                                                                                                                                   |                                                                                                                                                                                                                                                                                |                                                                                                                                                                                                                                                                                      |                                                           |                                                                                                                                                                                                                                              |                                                                                                                                                                                                                    |
|-------------------------------------------------------------------------------------------------------------------------------------------------------------------------------------------------------------------------------------------------------------------------|----------------------|------|----|---------------------------------------------------------------------------------------------------------------------|------------------------------------------------------------------------------------------------------------------------------------------------------------------------------------|-------------------------------------------------------------------------------------------------------------------------------------------------------------------------------------------------------------------|--------------------------------------------------------------------------------------------------------------------------------------------------------------------------------------------------------------------------------------------------------------------------------|--------------------------------------------------------------------------------------------------------------------------------------------------------------------------------------------------------------------------------------------------------------------------------------|-----------------------------------------------------------|----------------------------------------------------------------------------------------------------------------------------------------------------------------------------------------------------------------------------------------------|--------------------------------------------------------------------------------------------------------------------------------------------------------------------------------------------------------------------|
| 1<br>2<br>3<br>4<br>5<br>6<br>7<br>8<br>9<br>10<br>11<br>12<br>13<br>14<br>15<br>16<br>17<br>18<br>19<br>20<br>21<br>22<br>23<br>24<br>25<br>26<br>27<br>28<br>29<br>30<br>31<br>32<br>33<br>34<br>35<br>36<br>37<br>38<br>39<br>40<br>41<br>42<br>43<br>44<br>45<br>46 | Millar <sup>31</sup> | 2010 | UK | 152 community based service users 100 inpatient and community service users all prescribed antipsychotic medication | Dundee Health Screening Clinic developed to address needs of this population by monitoring physical health and providing follow-up to ensure that patients received necessary care | The Health Screening Clinic included three main types of clinical investigations: 1) physical examination, ECG, and blood screening 2) rating scales with medical/drug histories and 3) diet and lifestyle advice | MS audit of 152 community-based patients to quantify their physical health problems. A database was set up to record the measurements completed within the Clinic. Results were collected and appropriate follow-up was organised through primary care or specialist services. | Staff at the Dundee Health Screening Clinic (community setting with a multidisciplinary team drawn from the Community Mental Health Team and day hospital staff). Nursing staff were trained in blood letting, measuring blood pressure and waist circumference and completing ECGs. | Mixed Methods: pilot study, audit and satisfaction survey | Heavy burden of physical health problems identified in Phase One (66% obesity, 60% elevated cholesterol, 32% hypertension) Of the first 100 patients audited: 33% had MS 99% agreed health screening important 65% reported lifestyle change | No randomization, no control group<br><br>Generalizability may be limited due to differences in availability of resources in different areas, though no additional resources were used to develop the intervention |
|-------------------------------------------------------------------------------------------------------------------------------------------------------------------------------------------------------------------------------------------------------------------------|----------------------|------|----|---------------------------------------------------------------------------------------------------------------------|------------------------------------------------------------------------------------------------------------------------------------------------------------------------------------|-------------------------------------------------------------------------------------------------------------------------------------------------------------------------------------------------------------------|--------------------------------------------------------------------------------------------------------------------------------------------------------------------------------------------------------------------------------------------------------------------------------|--------------------------------------------------------------------------------------------------------------------------------------------------------------------------------------------------------------------------------------------------------------------------------------|-----------------------------------------------------------|----------------------------------------------------------------------------------------------------------------------------------------------------------------------------------------------------------------------------------------------|--------------------------------------------------------------------------------------------------------------------------------------------------------------------------------------------------------------------|

1  
2  
3  
4  
5  
6  
7  
8  
9  
10  
11  
12  
13  
14  
15  
16  
17  
18  
19  
20  
21  
22  
23  
24  
25  
26  
27  
28  
29  
30  
31  
32  
33  
34  
35  
36  
37  
38  
39  
40  
41  
42  
43  
44  
45  
46

|                            |      |    |                                                                    |                                                                                                                                        |                                                                                    |                                                                                                                                                                                                                                                                                 |                                                                                                                                                                                                               |                                      |                                                                                                                                                                                                                                                                                                                                                                  |                                                                                                                                                                                                                                                                                                    |
|----------------------------|------|----|--------------------------------------------------------------------|----------------------------------------------------------------------------------------------------------------------------------------|------------------------------------------------------------------------------------|---------------------------------------------------------------------------------------------------------------------------------------------------------------------------------------------------------------------------------------------------------------------------------|---------------------------------------------------------------------------------------------------------------------------------------------------------------------------------------------------------------|--------------------------------------|------------------------------------------------------------------------------------------------------------------------------------------------------------------------------------------------------------------------------------------------------------------------------------------------------------------------------------------------------------------|----------------------------------------------------------------------------------------------------------------------------------------------------------------------------------------------------------------------------------------------------------------------------------------------------|
| Osborn et al <sup>45</sup> | 2010 | UK | 121 service users under the care of a community mental health team | Nurse-led screening programme and education pack regarding appropriate screening for cardiovascular disease (CVD) related risk factors | CVD screening (including smoking, blood pressure, random blood glucose and lipids) | The intervention established a system to monitor whether CVD screening had occurred for CMHT patients and sent prompts to primary and secondary care staff if screening had not occurred. The nurse offered screening to cover patients who still had not received the complete | Within the intervention arm, approximately half the screening was performed in general practice and half by the trial registered general nurse with previous experience of providing cardiovascular screening | Cluster Randomized Feasibility trial | After the trial CVD screening increased in both arms but participants from intervention arm were significantly more likely to have received screening for blood pressure (96% vs 68%), cholesterol (66.7% vs 26.9%), glucose (66.7% vs 36.5%), BMI (92.5% vs 65.2%), smoking status (88.2% vs 57.8%) and have 10 year CVD risk score calculated (38.2% vs 10.9%) | Low risk of bias<br><br>Response rate in the recruitment for outcome data was main limitation<br><br>Recruitment was time limited because of funding<br><br>Participants who provided outcome data may have been a biased sample of CMHT patients therefore generalization of results is difficult |
|----------------------------|------|----|--------------------------------------------------------------------|----------------------------------------------------------------------------------------------------------------------------------------|------------------------------------------------------------------------------------|---------------------------------------------------------------------------------------------------------------------------------------------------------------------------------------------------------------------------------------------------------------------------------|---------------------------------------------------------------------------------------------------------------------------------------------------------------------------------------------------------------|--------------------------------------|------------------------------------------------------------------------------------------------------------------------------------------------------------------------------------------------------------------------------------------------------------------------------------------------------------------------------------------------------------------|----------------------------------------------------------------------------------------------------------------------------------------------------------------------------------------------------------------------------------------------------------------------------------------------------|

|                               |      |           |                                                                                                              |                                                                                                          |                                                                                                                          |                                                                                                                                                   |                                                                                             |                                                                                  |                                                                                                                                                                                  |                                                                                           |
|-------------------------------|------|-----------|--------------------------------------------------------------------------------------------------------------|----------------------------------------------------------------------------------------------------------|--------------------------------------------------------------------------------------------------------------------------|---------------------------------------------------------------------------------------------------------------------------------------------------|---------------------------------------------------------------------------------------------|----------------------------------------------------------------------------------|----------------------------------------------------------------------------------------------------------------------------------------------------------------------------------|-------------------------------------------------------------------------------------------|
|                               |      |           |                                                                                                              |                                                                                                          |                                                                                                                          | battery of CVD screening                                                                                                                          |                                                                                             |                                                                                  |                                                                                                                                                                                  |                                                                                           |
| Rosenbaum et al <sup>46</sup> | 2014 | Australia | 60 service users on inpatient psychiatric ward<br>25 mental health nurses                                    | Education al training including waist circumference (WC) measurement<br>Change in assessment-form design | WC measurement                                                                                                           | Over a nine month period, file-based reminder for nurse-assessed WC measurement of mental health inpatients within a private psychiatric facility | Mental health nurses working in a private psychiatric hospital in Sydney                    | Pre-post audit of the frequency of WC<br>Documentation before/after intervention | Improved measurement by nurses of WC from 0-58%<br>WC was higher in these patients than general population 19% had BMI within a healthy range, 37% smoked, 31% were hypertensive | No randomization, no control group<br><br>Not all staff were able to receive intervention |
| Thompson et al <sup>43</sup>  | 2011 | Australia | 118 files of service users on antipsychotics under the care of Early Psychosis and Prevention Centre service | Education al intervention for staff<br>Development of local guidelines , provision of                    | Weight and metabolic monitoring (height and weight to estimate BMI, systolic and diastolic blood pressure, waist and hip | Equipment required to undertake monitoring (e.g. scales, tape measures, blood pressure cuffs) was located in each                                 | Psychiatrists working in an Early Psychosis Prevention and Intervention Centre in Melbourne | Pre-post audit of completion of metabolic screens                                | Improvements in screening and monitoring of four metabolic indices at the post-intervention time point<br><br>Individual rates were higher for screening (74.4% to               | No randomization, no control group<br><br>Naturalistic setting                            |

1  
2  
3  
4  
5  
6  
7  
8  
9  
10  
11  
12  
13  
14  
15  
16  
17  
18  
19  
20  
21  
22  
23  
24  
25  
26  
27  
28  
29  
30  
31  
32  
33  
34  
35  
36  
37  
38  
39  
40  
41  
42  
43  
44  
45  
46

|  |  |  |  |                                                                                                        |                                                                                                                                                                                                                                                                                                                                        |                                                                                                                                                                                                                                                                                                                                                                                  |  |  |                                                                                                                                                          |  |
|--|--|--|--|--------------------------------------------------------------------------------------------------------|----------------------------------------------------------------------------------------------------------------------------------------------------------------------------------------------------------------------------------------------------------------------------------------------------------------------------------------|----------------------------------------------------------------------------------------------------------------------------------------------------------------------------------------------------------------------------------------------------------------------------------------------------------------------------------------------------------------------------------|--|--|----------------------------------------------------------------------------------------------------------------------------------------------------------|--|
|  |  |  |  | monitorin<br>g<br>equipmen<br>t,<br>prompts<br>in<br>patients'<br>records<br>and<br>regular<br>reviews | circumfere<br>nce (to<br>obtain<br>waist-hip<br>ratio),<br>fasting<br>blood<br>glucose,<br>full fasting<br>blood lipid<br>profile<br>(including<br>total<br>cholesterol,<br>low and<br>high<br>density<br>lipoprotein<br>and<br>triglyceride<br>s), number<br>of<br>cigarettes<br>smoked<br>daily and<br>level of<br>daily<br>exercise | psychiatrist<br>'s room.<br>Stamps<br>that<br>indicated<br>the<br>necessary<br>blood tests<br>for<br>monitoring<br>were<br>placed in<br>the<br>psychiatrist<br>s' rooms<br>to aid<br>ordering<br>and<br>completion<br>of the<br>correct<br>blood<br>investigatio<br>ns.<br>Metabolic<br>screening<br>within<br>6 months<br>of being<br>prescribed<br>an<br>antipsychot<br>ic and |  |  | 84.9%) than<br>monitoring<br>outcomes<br>(24.4% to<br>41.6%)<br>Rates ranged<br>between<br>17.4% for blood<br>lipids to 34.9%<br>for obesity<br>measures |  |
|--|--|--|--|--------------------------------------------------------------------------------------------------------|----------------------------------------------------------------------------------------------------------------------------------------------------------------------------------------------------------------------------------------------------------------------------------------------------------------------------------------|----------------------------------------------------------------------------------------------------------------------------------------------------------------------------------------------------------------------------------------------------------------------------------------------------------------------------------------------------------------------------------|--|--|----------------------------------------------------------------------------------------------------------------------------------------------------------|--|

|                                    |      |    |                                                                            |                                                                 |                                                             |                                                                                                                                                                                                                                           |                                                                         |                |                                                                                               |                                                                                                             |
|------------------------------------|------|----|----------------------------------------------------------------------------|-----------------------------------------------------------------|-------------------------------------------------------------|-------------------------------------------------------------------------------------------------------------------------------------------------------------------------------------------------------------------------------------------|-------------------------------------------------------------------------|----------------|-----------------------------------------------------------------------------------------------|-------------------------------------------------------------------------------------------------------------|
|                                    |      |    |                                                                            |                                                                 |                                                             | metabolic monitoring between 1 and 6 months following initiation of antipsychotic medication . Regular review of a patient's metabolic status was built into the clinical review process which occurs on a 3-month basis for all patients |                                                                         |                |                                                                                               |                                                                                                             |
| Vasudev & Martindale <sup>42</sup> | 2010 | UK | 66-72 service users aged 14 to 35 under care of Early Intervention service | In-house training for members of the Early Intervention Service | Annual physical health check (weight, blood pressure, blood | Mental health clinicians address physical health with patients during                                                                                                                                                                     | Patients in Early Interventions in Psychosis service in Sunderland were | Pre-post audit | Number of patients having at least one annual physical health check increased from 20% to 58% | No randomization, no control group<br><br>Focuses on Early Intervention so many people do not have a formal |



1  
2  
3  
4  
5  
6  
7  
8  
9  
10  
11  
12  
13  
14  
15  
16  
17  
18  
19  
20  
21  
22  
23  
24  
25  
26  
27  
28  
29  
30  
31  
32  
33  
34  
35  
36  
37  
38  
39  
40  
41  
42  
43  
44  
45  
46

|  |  |  |                       |                                                                                                                                                                                                                                           |                                                                                                                                                                                   |                                                                                                                                          |                                                  |  |                                                                                                                                                 |                                                                                                                                |
|--|--|--|-----------------------|-------------------------------------------------------------------------------------------------------------------------------------------------------------------------------------------------------------------------------------------|-----------------------------------------------------------------------------------------------------------------------------------------------------------------------------------|------------------------------------------------------------------------------------------------------------------------------------------|--------------------------------------------------|--|-------------------------------------------------------------------------------------------------------------------------------------------------|--------------------------------------------------------------------------------------------------------------------------------|
|  |  |  | for more than a month | Interventions between audit – in-house training, physical health mandatory component on care plan review, joint responsibility for communicating with GP, referral information updated to include physical health, liaison with wider MDT | sugar, lipids, electrocardiogram (only done if patient at high risk due to young patient age), full blood count, urea and serum electrolytes, liver function tests and prolactin) | clinical practice and letters are sent annually to GPs to remind them to conduct the physical health checks (study audited this process) | recruited; screening takes place in primary care |  | Patients who had undergone physical health check at re-audit, a record of some/all of the checks was available in the notes for 75% of patients | diagnosis of SMI e.g. schizophrenia<br><br>Only 7 months between audits, therefore very short time to measure long term impact |
|--|--|--|-----------------------|-------------------------------------------------------------------------------------------------------------------------------------------------------------------------------------------------------------------------------------------|-----------------------------------------------------------------------------------------------------------------------------------------------------------------------------------|------------------------------------------------------------------------------------------------------------------------------------------|--------------------------------------------------|--|-------------------------------------------------------------------------------------------------------------------------------------------------|--------------------------------------------------------------------------------------------------------------------------------|

|                            |      |           |                                                     |                                                                                                                                                                                                                                                                |                                                                            |                                                                                                                                                                                                                                                                                                                 |                                                                                                                                                                                                              |                                   |                                                                                                                                      |                                                                                                                                 |
|----------------------------|------|-----------|-----------------------------------------------------|----------------------------------------------------------------------------------------------------------------------------------------------------------------------------------------------------------------------------------------------------------------|----------------------------------------------------------------------------|-----------------------------------------------------------------------------------------------------------------------------------------------------------------------------------------------------------------------------------------------------------------------------------------------------------------|--------------------------------------------------------------------------------------------------------------------------------------------------------------------------------------------------------------|-----------------------------------|--------------------------------------------------------------------------------------------------------------------------------------|---------------------------------------------------------------------------------------------------------------------------------|
| Wilson et al <sup>48</sup> | 2014 | Australia | 107 to 232 service users attending clozapine clinic | Six education sessions covering test interpretation, MS, diabetes management, obesity, smoking cessation and lifestyle interventions<br>“Let’s Get Physical” initiative – designation of two months annually as physical health months (PHM) during which time | Metabolic monitoring (including fasting blood glucose, lipids, BMI, girth) | Metabolic monitoring occurs in May and November (designed as ‘physical health months’). In the months preceding May and November, investigations were attached to charts for provision by administrators, written information about investigations was provided to patients during consultations, and necessary | Patients on clozapine and staff at Metro North Mental Health – Royal Brisbane and Women’s Hospital, which provides assessment and specialist services to a socio-economically diverse population in Brisbane | Quality Improvement Mixed Methods | Completion rates of metabolic monitoring: 69.2% at first month and 65.1% at second month<br>Limited evidence of actions post results | No randomization, no control group<br><br>Limited possibility of generalization due to single site and very specific population |
|----------------------------|------|-----------|-----------------------------------------------------|----------------------------------------------------------------------------------------------------------------------------------------------------------------------------------------------------------------------------------------------------------------|----------------------------------------------------------------------------|-----------------------------------------------------------------------------------------------------------------------------------------------------------------------------------------------------------------------------------------------------------------------------------------------------------------|--------------------------------------------------------------------------------------------------------------------------------------------------------------------------------------------------------------|-----------------------------------|--------------------------------------------------------------------------------------------------------------------------------------|---------------------------------------------------------------------------------------------------------------------------------|

1  
2  
3  
4  
5  
6  
7  
8  
9  
10  
11  
12  
13  
14  
15  
16  
17  
18  
19  
20  
21  
22  
23  
24  
25  
26  
27  
28  
29  
30  
31  
32  
33  
34  
35  
36  
37  
38  
39  
40  
41  
42  
43  
44  
45  
46

|  |  |  |  |                                                                                                                                                                                                    |  |                                                                                                                                                                                                                                                                |  |  |  |  |
|--|--|--|--|----------------------------------------------------------------------------------------------------------------------------------------------------------------------------------------------------|--|----------------------------------------------------------------------------------------------------------------------------------------------------------------------------------------------------------------------------------------------------------------|--|--|--|--|
|  |  |  |  | <p>revised service protocol required metabolic monitoring for all eligible patients</p> <p>Service protocols were revised to require metabolic monitoring of all eligible patients during PHMs</p> |  | <p>equipment was placed in consulting rooms. In May and November, a proforma for recording test results and lifestyle assessments (smoking, exercise, alcohol intake) were attached to charts, and clinic appointments were extended from 20 to 30 minutes</p> |  |  |  |  |
|--|--|--|--|----------------------------------------------------------------------------------------------------------------------------------------------------------------------------------------------------|--|----------------------------------------------------------------------------------------------------------------------------------------------------------------------------------------------------------------------------------------------------------------|--|--|--|--|

|                           |      |     |                                                                                                        |                                                                                                                                                     |                                                                                                                                                                                                                                                                                                      |                                                                                                 |                                                                                                                                                                                                                                                                                                                  |                                                                        |                                                                                                                                                                                                                                                                                                     |                                                                                                                |
|---------------------------|------|-----|--------------------------------------------------------------------------------------------------------|-----------------------------------------------------------------------------------------------------------------------------------------------------|------------------------------------------------------------------------------------------------------------------------------------------------------------------------------------------------------------------------------------------------------------------------------------------------------|-------------------------------------------------------------------------------------------------|------------------------------------------------------------------------------------------------------------------------------------------------------------------------------------------------------------------------------------------------------------------------------------------------------------------|------------------------------------------------------------------------|-----------------------------------------------------------------------------------------------------------------------------------------------------------------------------------------------------------------------------------------------------------------------------------------------------|----------------------------------------------------------------------------------------------------------------|
| Xiong et al <sup>30</sup> | 2015 | USA | Patients were receiving outpatient mental health treatment at four mental health clinics in California | Comparison of preventive services used in an integrated behavioural health primary care clinic with two existing community mental health programmes | Cancer services included the following tests/procedures: mammogram, Papanicolaou test, prostate specific antigen test, digital rectal exam, fecal occult blood test, and flexible sigmoidoscopy or colonoscopy. Metabolic profile included blood pressure, height and weight, cholesterol, and blood | Psychiatrists made referrals to primary care doctors for screening in routine clinical practice | Screening was undertaken by various clinical staff and took place in primary care (via referral from two community mental health clinics) and in an Integrated Behavioral Health Primary Care programme housed in the Sacramento County Primary Care Clinic with access to on-site laboratory and x-ray services | Cross-sectional study comparing use of preventive services 350 surveys | Patients on antipsychotic medication were less likely to use preventive non-cancer services than their comparison group ( $p = 0.04$ )<br><br>Integrated Behavioral Health Primary Care unit associated with higher overall service utilization than a community mental health team ( $p < 0.001$ ) | No randomization, no control group<br><br>Unable to adjust for confounding factors such as severity of illness |
|---------------------------|------|-----|--------------------------------------------------------------------------------------------------------|-----------------------------------------------------------------------------------------------------------------------------------------------------|------------------------------------------------------------------------------------------------------------------------------------------------------------------------------------------------------------------------------------------------------------------------------------------------------|-------------------------------------------------------------------------------------------------|------------------------------------------------------------------------------------------------------------------------------------------------------------------------------------------------------------------------------------------------------------------------------------------------------------------|------------------------------------------------------------------------|-----------------------------------------------------------------------------------------------------------------------------------------------------------------------------------------------------------------------------------------------------------------------------------------------------|----------------------------------------------------------------------------------------------------------------|

1  
2  
3  
4  
5  
6  
7  
8  
9  
10  
11  
12  
13  
14  
15  
16  
17  
18  
19  
20  
21  
22  
23  
24  
25  
26  
27  
28  
29  
30  
31  
32  
33  
34  
35  
36  
37  
38  
39  
40  
41  
42  
43  
44  
45  
46

|  |  |  |  |  |                                                                                                                                                |  |  |  |  |  |
|--|--|--|--|--|------------------------------------------------------------------------------------------------------------------------------------------------|--|--|--|--|--|
|  |  |  |  |  | sugar for diabetes.<br>Infection preventive services included influenza immunization, Hepatitis C Virus and Human Immunodeficiency Virus tests |  |  |  |  |  |
|--|--|--|--|--|------------------------------------------------------------------------------------------------------------------------------------------------|--|--|--|--|--|

For peer review only

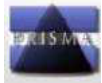

# PRISMA 2009 Checklist

| Section/topic                      | #  | Checklist item                                                                                                                                                                                                                                                                                              | Reported on page # |
|------------------------------------|----|-------------------------------------------------------------------------------------------------------------------------------------------------------------------------------------------------------------------------------------------------------------------------------------------------------------|--------------------|
| <b>TITLE</b>                       |    |                                                                                                                                                                                                                                                                                                             |                    |
| Title                              | 1  | Identify the report as a systematic review, meta-analysis, or both.                                                                                                                                                                                                                                         | 1                  |
| <b>ABSTRACT</b>                    |    |                                                                                                                                                                                                                                                                                                             |                    |
| Structured summary                 | 2  | Provide a structured summary including, as applicable: background; objectives; data sources; study eligibility criteria, participants, and interventions; study appraisal and synthesis methods; results; limitations; conclusions and implications of key findings; systematic review registration number. | 2                  |
| <b>INTRODUCTION</b>                |    |                                                                                                                                                                                                                                                                                                             |                    |
| Rationale                          | 3  | Describe the rationale for the review in the context of what is already known.                                                                                                                                                                                                                              | 3-4                |
| Objectives                         | 4  | Provide an explicit statement of questions being addressed with reference to participants, interventions, comparisons, outcomes, and study design (PICOS).                                                                                                                                                  | 4                  |
| <b>METHODS</b>                     |    |                                                                                                                                                                                                                                                                                                             |                    |
| Protocol and registration          | 5  | Indicate if a review protocol exists, if and where it can be accessed (e.g., Web address), and, if available, provide registration information including registration number.                                                                                                                               | 4                  |
| Eligibility criteria               | 6  | Specify study characteristics (e.g., PICOS, length of follow-up) and report characteristics (e.g., years considered, language, publication status) used as criteria for eligibility, giving rationale.                                                                                                      | 4                  |
| Information sources                | 7  | Describe all information sources (e.g., databases with dates of coverage, contact with study authors to identify additional studies) in the search and date last searched.                                                                                                                                  | 4                  |
| Search                             | 8  | Present full electronic search strategy for at least one database, including any limits used, such that it could be repeated.                                                                                                                                                                               | Appendix 1         |
| Study selection                    | 9  | State the process for selecting studies (i.e., screening, eligibility, included in systematic review, and, if applicable, included in the meta-analysis).                                                                                                                                                   | 5                  |
| Data collection process            | 10 | Describe method of data extraction from reports (e.g., piloted forms, independently, in duplicate) and any processes for obtaining and confirming data from investigators.                                                                                                                                  | 5                  |
| Data items                         | 11 | List and define all variables for which data were sought (e.g., PICOS, funding sources) and any assumptions and simplifications made.                                                                                                                                                                       | N/A                |
| Risk of bias in individual studies | 12 | Describe methods used for assessing risk of bias of individual studies (including specification of whether this was done at the study or outcome level), and how this information is to be used in any data synthesis.                                                                                      | 6                  |
| Summary measures                   | 13 | State the principal summary measures (e.g., risk ratio, difference in means).                                                                                                                                                                                                                               | N/A                |
| Synthesis of results               | 14 | Describe the methods of handling data and combining results of studies, if done, including measures of consistency (e.g., $I^2$ ) for each meta-analysis.                                                                                                                                                   | N/A                |

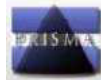

# PRISMA 2009 Checklist

Page 1 of 2

| Section/topic                 | #  | Checklist item                                                                                                                                                                                           | Reported on page #      |
|-------------------------------|----|----------------------------------------------------------------------------------------------------------------------------------------------------------------------------------------------------------|-------------------------|
| Risk of bias across studies   | 15 | Specify any assessment of risk of bias that may affect the cumulative evidence (e.g., publication bias, selective reporting within studies).                                                             | 6                       |
| Additional analyses           | 16 | Describe methods of additional analyses (e.g., sensitivity or subgroup analyses, meta-regression), if done, indicating which were pre-specified.                                                         | N/A                     |
| <b>RESULTS</b>                |    |                                                                                                                                                                                                          |                         |
| Study selection               | 17 | Give numbers of studies screened, assessed for eligibility, and included in the review, with reasons for exclusions at each stage, ideally with a flow diagram.                                          | Figure 1 PRISMA Diagram |
| Study characteristics         | 18 | For each study, present characteristics for which data were extracted (e.g., study size, PICOS, follow-up period) and provide the citations.                                                             | Tables 1 and 2          |
| Risk of bias within studies   | 19 | Present data on risk of bias of each study and, if available, any outcome level assessment (see item 12).                                                                                                | Tables 1 and 2          |
| Results of individual studies | 20 | For all outcomes considered (benefits or harms), present, for each study: (a) simple summary data for each intervention group (b) effect estimates and confidence intervals, ideally with a forest plot. | N/A                     |
| Synthesis of results          | 21 | Present results of each meta-analysis done, including confidence intervals and measures of consistency.                                                                                                  | N/A                     |
| Risk of bias across studies   | 22 | Present results of any assessment of risk of bias across studies (see Item 15).                                                                                                                          | Tables 1 and 2          |
| Additional analysis           | 23 | Give results of additional analyses, if done (e.g., sensitivity or subgroup analyses, meta-regression [see Item 16]).                                                                                    | N/A                     |
| <b>DISCUSSION</b>             |    |                                                                                                                                                                                                          |                         |
| Summary of evidence           | 24 | Summarize the main findings including the strength of evidence for each main outcome; consider their relevance to key groups (e.g., healthcare providers, users, and policy makers).                     | 10-12                   |
| Limitations                   | 25 | Discuss limitations at study and outcome level (e.g., risk of bias), and at review-level (e.g., incomplete retrieval of identified research, reporting bias).                                            | 12                      |
| Conclusions                   | 26 | Provide a general interpretation of the results in the context of other evidence, and implications for future research.                                                                                  | 12-13                   |
| <b>FUNDING</b>                |    |                                                                                                                                                                                                          |                         |
| Funding                       | 27 | Describe sources of funding for the systematic review and other support (e.g., supply of data); role of funders for the systematic review.                                                               | 13                      |

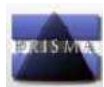

# PRISMA 2009 Checklist

- 1
- 2
- 3
- 4
- 5
- 6
- 7
- 8
- 9
- 10
- 11
- 12
- 13
- 14
- 15
- 16
- 17
- 18
- 19
- 20
- 21
- 22
- 23
- 24
- 25
- 26
- 27
- 28
- 29
- 30
- 31
- 32
- 33
- 34
- 35
- 36
- 37
- 38
- 39
- 40
- 41
- 42
- 43
- 44
- 45
- 46
- 47

doi:10.1371/journal.pmed1000097

For peer review only
