# Supplementary material for: Interventions to increase access to or uptake of physical health screening in people with severe mental illness: a realist review
Source: PubMed Central journal article supplement — BMJ Open. 2018 Feb 10;8(2):e019412. doi: 10.1136/bmjopen-2017-019412 (PMC5829934; doi:10.1136/bmjopen-2017-019412), 2018-02-10
Supplement: bmjopen-2017-019412supp001.pdf [file bmjopen-2017-019412supp001.pdf]

## Appendix

### 1. Search terms used in search strategy

The following terms will be used in all data sources: (cardiovascular OR vascular OR CVD OR 'chronic heart disease' OR 'coronary heart disease' OR CHD OR diabetes OR metabolic OR aneurysm) OR cancer OR neoplasm OR carcinoma OR maligna\* OR \*tumour OR tumor OR breast OR mammogra\* OR bowel OR cervical OR pap\*) OR (dental OR dentist OR tooth OR teeth) OR (eye OR retinopathy) AND ('mass screening' OR surveillance\*) OR "Screening Test" OR ((cholesterol OR fecal OR faecal OR blood OR HIV OR sig-moid OR tuberculosis) AND test\*) OR "health check\*" AND (letter OR mail\* OR phone OR telephone OR 'reminder system\*' OR 'videotape recording\*' OR 'audiotape recording\*' OR questionnaire\* OR strateg\* OR alert\* OR hotline OR community OR media) AND (intervention\* OR goal OR 'behav\* change' OR 'implementation intention\*' OR plans OR planned OR planning OR plan OR educat\* OR campaign\* OR barriers OR intention\* OR 'behav\* outcome' OR outcome OR 'lifestyle change' OR longitudinal OR 'follow up' OR motivation\*) AND (satisf\* OR dropout\* OR 'drop out' OR attrition OR uptak\* OR adher\* OR compliance OR complie\* OR comply\* OR 'patient acceptance of health care' OR encourag\* OR improve\* OR improving OR increas\* OR promot\* OR particip\* OR nonattend\* OR 'non attend' OR accept\* OR attend\* OR attitud\* OR utilisation OR utilization OR refus\* OR respond\* OR respons\* OR reluctan\* OR nonrespon\* OR 'non respon\*' OR incidence OR prevalence OR prevalence OR satisfaction OR cooperat\* OR 'co operat\*') AND ('severe mental illness' OR 'mental illness' OR schizophrenia OR catatonic OR paranoid OR disorganized OR disorganised OR bipolar OR manic OR psychosis OR psychotic OR psychiatric OR schizophrenic OR SMI)
