# Supplementary material for: Interventions to increase access to or uptake of physical health screening in people with severe mental illness: a realist review
Source: PubMed Central journal article supplement — BMJ Open. 2018 Feb 10;8(2):e019412. doi: 10.1136/bmjopen-2017-019412 (PMC5829934; doi:10.1136/bmjopen-2017-019412), 2018-02-10
Supplement: bmjopen-2017-019412supp003.pdf [file bmjopen-2017-019412supp003.pdf]

**Table 2: Studies of health service delivery changes**

| First Author                 | Year | Country | Population Studied                                       | Intervention                                       | Screening                                                                                                                                                                                               |                                                                                                                     |                                                                                                                                                                                      | Method(s) applied   | Results                                                                                                                                                                                                                                                                        | Main study weaknesses                                                                                                                                                                          |
|------------------------------|------|---------|----------------------------------------------------------|----------------------------------------------------|---------------------------------------------------------------------------------------------------------------------------------------------------------------------------------------------------------|---------------------------------------------------------------------------------------------------------------------|--------------------------------------------------------------------------------------------------------------------------------------------------------------------------------------|---------------------|--------------------------------------------------------------------------------------------------------------------------------------------------------------------------------------------------------------------------------------------------------------------------------|------------------------------------------------------------------------------------------------------------------------------------------------------------------------------------------------|
|                              |      |         |                                                          |                                                    | Type of screening (targeted or with multiple parameters )                                                                                                                                               | When, how and where in the care pathway was screening offered                                                       | Screening health professional(s) and type of service                                                                                                                                 |                     |                                                                                                                                                                                                                                                                                |                                                                                                                                                                                                |
| Abdallah et al <sup>40</sup> | 2016 | UK      | 95 service users with schizophrenia living in care homes | Patient education and education of care home staff | Physical health monitoring (blood workup, liver function test, urea and Electrolytes , full blood count, fasting blood glucose, blood lipid, HbA1c, prolactin, blood pressure/pulse/weight measurement) | Physical health screening was offered during the Care Programme Approach review (held every six months to one year) | Screening was done by GPs. Patients were attached to the Haringey Community Rehabilitation team (multidisciplinary care coordination team that includes mental health nurses, social | Quality Improvement | Improvement in culture within care home where staff and service users actively participated in physical health monitoring Blood pressure and weight measured in 68% of patients compared to 10% and 0 at baseline 55% of patients had pulse measured compared to 0 at baseline | No randomization, no control group<br><br>Small sample, difficult to determine results as in later PDSA cycles the interventions did not target only the patient group included in the results |

|                           |      |     |                                                          |                                                                                                                                                                                                           |                                                                                                                                                                                                                                |                                                                                                                                                                                                                 |                                                                                                                                             |                          |                                                                                                                                                                                                                                                                                      |                                                                                                                                                                                                                                                                                                                                         |
|---------------------------|------|-----|----------------------------------------------------------|-----------------------------------------------------------------------------------------------------------------------------------------------------------------------------------------------------------|--------------------------------------------------------------------------------------------------------------------------------------------------------------------------------------------------------------------------------|-----------------------------------------------------------------------------------------------------------------------------------------------------------------------------------------------------------------|---------------------------------------------------------------------------------------------------------------------------------------------|--------------------------|--------------------------------------------------------------------------------------------------------------------------------------------------------------------------------------------------------------------------------------------------------------------------------------|-----------------------------------------------------------------------------------------------------------------------------------------------------------------------------------------------------------------------------------------------------------------------------------------------------------------------------------------|
|                           |      |     |                                                          |                                                                                                                                                                                                           | ent, BMI, waist circumference)                                                                                                                                                                                                 |                                                                                                                                                                                                                 | workers, psychiatrists, psychologists, and mental health care assistants)                                                                   |                          | 68% had bloods done compared to 0 at baseline                                                                                                                                                                                                                                        |                                                                                                                                                                                                                                                                                                                                         |
| Druss et al <sup>44</sup> | 2010 | USA | 407 service users with SMI under care of community teams | Participants with SMI at an urban community mental health centre were randomly assigned to either the medical care management intervention or usual care. For individuals in the intervention group, care | 23 indicators drawn from the U.S. Preventive Services Task Force guidelines were included across the following four domains: 1) physical examination (blood pressure, eye, height/weight, oral, breast, mammogram, and pelvic) | Care managers supported patients to get screened by providing communication and advocacy with medical providers, health education, and support in overcoming system-level fragmentation and barriers to primary | Care managers (registered nurses) assisted patients from an urban community mental health centre in Atlanta to access primary care services | Randomized Control Trial | 12-month follow-up evaluation: intervention group received average 58.7% of recommended preventive services compared with 21.8% in usual care. Significantly higher proportion of evidence-based services for cardio-metabolic conditions (34.9% versus 27.7%). Higher likelihood to | Low risk of bias (Performance bias as control group - treatment as usual - not blinded). Broad entry criteria limited the statistical power to examine outcomes for individual medical conditions. Study was conducted in a single site so replication would be needed to fully assess generalizability to different types of community |

|  |  |  |  |                                                                                                                                                                                                                                                                                                                                                                                                                                                                                          |                     |  |  |                                                                                                                                                                                                                                                                                                                                        |                               |
|--|--|--|--|------------------------------------------------------------------------------------------------------------------------------------------------------------------------------------------------------------------------------------------------------------------------------------------------------------------------------------------------------------------------------------------------------------------------------------------------------------------------------------------|---------------------|--|--|----------------------------------------------------------------------------------------------------------------------------------------------------------------------------------------------------------------------------------------------------------------------------------------------------------------------------------------|-------------------------------|
|  |  |  |  | <p>managers provided communication and advocacy with medical providers, health education, and support in overcoming system-level fragmentation and barriers to primary medical care</p> <p>2) screening tests (cholesterol, fecal blood, HIV, sigmoid, and tuberculosis)</p> <p>3) vaccinations (influenza, hepatitis B, measles, mumps, and rubella, pneumococcal bacterial infection, tetanus-diphtheria, and varicella)</p> <p>4) education (exercise, self-examination, smoking,</p> | <p>medical care</p> |  |  | <p>have primary care provider (71.2% versus 51.9%)</p> <p>Intervention group showed significant improvement on SF-36 mental component summary (8.0% [versus a 1.1% decline in the usual care group]) Scores on Framingham Cardiovascular Risk Index significantly better in intervention group (6.9%) than usual care group (9.8%)</p> | <p>mental health settings</p> |
|--|--|--|--|------------------------------------------------------------------------------------------------------------------------------------------------------------------------------------------------------------------------------------------------------------------------------------------------------------------------------------------------------------------------------------------------------------------------------------------------------------------------------------------|---------------------|--|--|----------------------------------------------------------------------------------------------------------------------------------------------------------------------------------------------------------------------------------------------------------------------------------------------------------------------------------------|-------------------------------|

|                            |      |    |                                                                                                       |                                                                                                                                                                                                                                                             |                                                                                                                                                                                                                                                          |                                                                                                                                                                         |                                 |                     |                                                                                                                                                                               |                                                                                                            |  |
|----------------------------|------|----|-------------------------------------------------------------------------------------------------------|-------------------------------------------------------------------------------------------------------------------------------------------------------------------------------------------------------------------------------------------------------------|----------------------------------------------------------------------------------------------------------------------------------------------------------------------------------------------------------------------------------------------------------|-------------------------------------------------------------------------------------------------------------------------------------------------------------------------|---------------------------------|---------------------|-------------------------------------------------------------------------------------------------------------------------------------------------------------------------------|------------------------------------------------------------------------------------------------------------|--|
|                            |      |    |                                                                                                       |                                                                                                                                                                                                                                                             | nutrition,<br>and weight)                                                                                                                                                                                                                                |                                                                                                                                                                         |                                 |                     |                                                                                                                                                                               |                                                                                                            |  |
| Hardy & Gray <sup>26</sup> | 2012 | UK | 92 community service users with severe and enduring mental illness<br>338 service users with diabetes | Retrospective comparison of response rate of patients with SMI and diabetes to an invitation appointment letter to attend a primary care health check<br>Patients with SMI sent an appointment at a predetermined time and date.<br>Annual health check for | HIP for primary care: review of any pre-existing comorbid physical health problems, screening for emergent diabetes, hypertension and dyslipidaemia, initiation of appropriate treatment for newly diagnosed conditions, providing information about co- | Patients with SMI were sent an appointment letter 10 days before the appointment inviting them to attend a primary care health check with a predetermined date and time | Practice nurses in primary care | Retrospective audit | 66% service users with SMI attended appointment<br>81% service users with diabetes attended appointment<br>Service users with diabetes 2.2 more likely to attend health check | No randomization, no control group<br><br>Unclear if sample reflects whole population of SMI (or diabetes) |  |

|  |  |  |  |                                             |                                                                                                                                                                                                                                                                     |  |  |  |  |  |
|--|--|--|--|---------------------------------------------|---------------------------------------------------------------------------------------------------------------------------------------------------------------------------------------------------------------------------------------------------------------------|--|--|--|--|--|
|  |  |  |  | patients with SMI followed the HIP guidance | occurring physical health problems, lifestyle advice (diet, exercise, smoking, alcohol, sex and guidance about self-examination (breast, testicles)), prompt that eyes and teeth have been tested/checked; review of psychotropic medication and side effect check. |  |  |  |  |  |
|--|--|--|--|---------------------------------------------|---------------------------------------------------------------------------------------------------------------------------------------------------------------------------------------------------------------------------------------------------------------------|--|--|--|--|--|

|                             |      |        |                                                                                                                 |                                                                                                                                                                                                                             |                       |                                                                                                                                        |                                                                                                                                                                                                                                                                                       |                                                                                |                                                                      |                                                                                                                                                                                                              |
|-----------------------------|------|--------|-----------------------------------------------------------------------------------------------------------------|-----------------------------------------------------------------------------------------------------------------------------------------------------------------------------------------------------------------------------|-----------------------|----------------------------------------------------------------------------------------------------------------------------------------|---------------------------------------------------------------------------------------------------------------------------------------------------------------------------------------------------------------------------------------------------------------------------------------|--------------------------------------------------------------------------------|----------------------------------------------------------------------|--------------------------------------------------------------------------------------------------------------------------------------------------------------------------------------------------------------|
| Heyding et al <sup>29</sup> | 2005 | Canada | Disadvantaged women aged 50-70 who attended inner-city drop-in centre (N = 158 in 1995-2001 and N = 89 in 2002) | Drop-in centre and nearby hospital in Toronto initiated collaborative breast cancer screening project in which staff of drop-in centre accompanied small groups of women for mammography visits at weekly pre-arranged time | Screening mammography | A staff member of the drop-in centre accompanied small groups of women aged 50-70 for mammography visits at a weekly pre-arranged time | Staff member of an inner-city drop-in centre in Toronto accompanied small groups of women to St. Michael's hospital women's health care centre for mammography screening. A family physician working at the drop-in centre served as the referring physician requesting the mammogram | Pre-post audit Comparison between screening before and after intervention year | Increase from average of 4.7% women receiving a mammography to 29.2% | No randomization, no control group<br><br>Observational rather than experimental design<br><br>Limited control over extraneous variables<br><br>Audited documentation may have been inaccurate or incomplete |
|-----------------------------|------|--------|-----------------------------------------------------------------------------------------------------------------|-----------------------------------------------------------------------------------------------------------------------------------------------------------------------------------------------------------------------------|-----------------------|----------------------------------------------------------------------------------------------------------------------------------------|---------------------------------------------------------------------------------------------------------------------------------------------------------------------------------------------------------------------------------------------------------------------------------------|--------------------------------------------------------------------------------|----------------------------------------------------------------------|--------------------------------------------------------------------------------------------------------------------------------------------------------------------------------------------------------------|

|                           |      |    |                                                                                         |                                                                                                                                      |                                                                                                                                                                                                                                                                            |                                                                                                                                                                                                                                                                                                            |                                                                                                                                                                                                                                                                         |                                                                                              |                                                                                                                                                                                                                                           |                                                                                          |
|---------------------------|------|----|-----------------------------------------------------------------------------------------|--------------------------------------------------------------------------------------------------------------------------------------|----------------------------------------------------------------------------------------------------------------------------------------------------------------------------------------------------------------------------------------------------------------------------|------------------------------------------------------------------------------------------------------------------------------------------------------------------------------------------------------------------------------------------------------------------------------------------------------------|-------------------------------------------------------------------------------------------------------------------------------------------------------------------------------------------------------------------------------------------------------------------------|----------------------------------------------------------------------------------------------|-------------------------------------------------------------------------------------------------------------------------------------------------------------------------------------------------------------------------------------------|------------------------------------------------------------------------------------------|
| Latoo et al <sup>41</sup> | 2015 | UK | 52-55 service users receiving antipsychotics in Early intervention in Psychosis service | Advancing Quality Alliance design to examine six physical health parameters: weight, height, BMI, BP, blood glucose and serum lipids | Comprehensive physical assessment (serum lipid profile, blood glucose, body weight, height, BMI and blood pressure). Other information was collected such as smoking, diet, exercise, sexual health, sleep, dental and optical health, ECGs and other routine blood checks | Notification list alerted on the computer when screening was due. Access to blood tests for both localities was established to help facilitate prompt access to blood results. Wellbeing nurse-led clinics were held in Halton and a social worker- led physical health clinic was initiated in Warrington | Patients were recruited from the Warrington and Halton Early Intervention in Psychosis Service. Screening took place in primary care and physical health clinics (wellbeing nurse-led clinics in Halton and a social worker- led physical health clinic in Warrington ) | Retrospective review of clinical records following improvement in physical health monitoring | Screening and monitoring of six parameters: At 4 weeks 29 patients recorded screening, 19 (66%) of which had six types of screening. At 24 months, out of 16 patients who had their screening recorded, 15 (95%) had 6 types of screening | No control group<br><br>No randomized design to test new screening and assessment method |
|---------------------------|------|----|-----------------------------------------------------------------------------------------|--------------------------------------------------------------------------------------------------------------------------------------|----------------------------------------------------------------------------------------------------------------------------------------------------------------------------------------------------------------------------------------------------------------------------|------------------------------------------------------------------------------------------------------------------------------------------------------------------------------------------------------------------------------------------------------------------------------------------------------------|-------------------------------------------------------------------------------------------------------------------------------------------------------------------------------------------------------------------------------------------------------------------------|----------------------------------------------------------------------------------------------|-------------------------------------------------------------------------------------------------------------------------------------------------------------------------------------------------------------------------------------------|------------------------------------------------------------------------------------------|

|                      |      |    |                                                                                                                     |                                                                                                                                                                                    |                                                                                                                                                                                                                   |                                                                                                                                                                                                                                                                                |                                                                                                                                                                                                                                                                                      |                                                           |                                                                                                                                                                                                                                              |                                                                                                                                                                                                                    |
|----------------------|------|----|---------------------------------------------------------------------------------------------------------------------|------------------------------------------------------------------------------------------------------------------------------------------------------------------------------------|-------------------------------------------------------------------------------------------------------------------------------------------------------------------------------------------------------------------|--------------------------------------------------------------------------------------------------------------------------------------------------------------------------------------------------------------------------------------------------------------------------------|--------------------------------------------------------------------------------------------------------------------------------------------------------------------------------------------------------------------------------------------------------------------------------------|-----------------------------------------------------------|----------------------------------------------------------------------------------------------------------------------------------------------------------------------------------------------------------------------------------------------|--------------------------------------------------------------------------------------------------------------------------------------------------------------------------------------------------------------------|
| Millar <sup>31</sup> | 2010 | UK | 152 community based service users 100 inpatient and community service users all prescribed antipsychotic medication | Dundee Health Screening Clinic developed to address needs of this population by monitoring physical health and providing follow-up to ensure that patients received necessary care | The Health Screening Clinic included three main types of clinical investigations: 1) physical examination, ECG, and blood screening 2) rating scales with medical/drug histories and 3) diet and lifestyle advice | MS audit of 152 community-based patients to quantify their physical health problems. A database was set up to record the measurements completed within the Clinic. Results were collected and appropriate follow-up was organised through primary care or specialist services. | Staff at the Dundee Health Screening Clinic (community setting with a multidisciplinary team drawn from the Community Mental Health Team and day hospital staff). Nursing staff were trained in blood letting, measuring blood pressure and waist circumference and completing ECGs. | Mixed Methods: pilot study, audit and satisfaction survey | Heavy burden of physical health problems identified in Phase One (66% obesity, 60% elevated cholesterol, 32% hypertension) Of the first 100 patients audited: 33% had MS 99% agreed health screening important 65% reported lifestyle change | No randomization, no control group<br><br>Generalizability may be limited due to differences in availability of resources in different areas, though no additional resources were used to develop the intervention |
|----------------------|------|----|---------------------------------------------------------------------------------------------------------------------|------------------------------------------------------------------------------------------------------------------------------------------------------------------------------------|-------------------------------------------------------------------------------------------------------------------------------------------------------------------------------------------------------------------|--------------------------------------------------------------------------------------------------------------------------------------------------------------------------------------------------------------------------------------------------------------------------------|--------------------------------------------------------------------------------------------------------------------------------------------------------------------------------------------------------------------------------------------------------------------------------------|-----------------------------------------------------------|----------------------------------------------------------------------------------------------------------------------------------------------------------------------------------------------------------------------------------------------|--------------------------------------------------------------------------------------------------------------------------------------------------------------------------------------------------------------------|



|                            |      |    |                                                                    |                                                                                                                                        |                                                                                    |                                                                                                                                                                                                                                                                                 |                                                                                                                                                                                                               |                                      |                                                                                                                                                                                                                                                                                                                                                                  |                                                                                                                                                                                                                                                                                        |
|----------------------------|------|----|--------------------------------------------------------------------|----------------------------------------------------------------------------------------------------------------------------------------|------------------------------------------------------------------------------------|---------------------------------------------------------------------------------------------------------------------------------------------------------------------------------------------------------------------------------------------------------------------------------|---------------------------------------------------------------------------------------------------------------------------------------------------------------------------------------------------------------|--------------------------------------|------------------------------------------------------------------------------------------------------------------------------------------------------------------------------------------------------------------------------------------------------------------------------------------------------------------------------------------------------------------|----------------------------------------------------------------------------------------------------------------------------------------------------------------------------------------------------------------------------------------------------------------------------------------|
| Osborn et al <sup>45</sup> | 2010 | UK | 121 service users under the care of a community mental health team | Nurse-led screening programme and education pack regarding appropriate screening for cardiovascular disease (CVD) related risk factors | CVD screening (including smoking, blood pressure, random blood glucose and lipids) | The intervention established a system to monitor whether CVD screening had occurred for CMHT patients and sent prompts to primary and secondary care staff if screening had not occurred. The nurse offered screening to cover patients who still had not received the complete | Within the intervention arm, approximately half the screening was performed in general practice and half by the trial registered general nurse with previous experience of providing cardiovascular screening | Cluster Randomized Feasibility trial | After the trial CVD screening increased in both arms but participants from intervention arm were significantly more likely to have received screening for blood pressure (96% vs 68%), cholesterol (66.7% vs 26.9%), glucose (66.7% vs 36.5%), BMI (92.5% vs 65.2%), smoking status (88.2% vs 57.8%) and have 10 year CVD risk score calculated (38.2% vs 10.9%) | Low risk of bias<br>Response rate in the recruitment for outcome data was main limitation<br>Recruitment was time limited because of funding<br>Participants who provided outcome data may have been a biased sample of CMHT patients therefore generalization of results is difficult |
|----------------------------|------|----|--------------------------------------------------------------------|----------------------------------------------------------------------------------------------------------------------------------------|------------------------------------------------------------------------------------|---------------------------------------------------------------------------------------------------------------------------------------------------------------------------------------------------------------------------------------------------------------------------------|---------------------------------------------------------------------------------------------------------------------------------------------------------------------------------------------------------------|--------------------------------------|------------------------------------------------------------------------------------------------------------------------------------------------------------------------------------------------------------------------------------------------------------------------------------------------------------------------------------------------------------------|----------------------------------------------------------------------------------------------------------------------------------------------------------------------------------------------------------------------------------------------------------------------------------------|

|                               |      |           |                                                                                                              |                                                                                                          |                                                                                                                          |                                                                                                                                                   |                                                                                             |                                                                                  |                                                                                                                                                                                  |                                                                                           |
|-------------------------------|------|-----------|--------------------------------------------------------------------------------------------------------------|----------------------------------------------------------------------------------------------------------|--------------------------------------------------------------------------------------------------------------------------|---------------------------------------------------------------------------------------------------------------------------------------------------|---------------------------------------------------------------------------------------------|----------------------------------------------------------------------------------|----------------------------------------------------------------------------------------------------------------------------------------------------------------------------------|-------------------------------------------------------------------------------------------|
|                               |      |           |                                                                                                              |                                                                                                          |                                                                                                                          | battery of CVD screening                                                                                                                          |                                                                                             |                                                                                  |                                                                                                                                                                                  |                                                                                           |
| Rosenbaum et al <sup>46</sup> | 2014 | Australia | 60 service users on inpatient psychiatric ward<br>25 mental health nurses                                    | Education al training including waist circumference (WC) measurement<br>Change in assessment-form design | WC measurement                                                                                                           | Over a nine month period, file-based reminder for nurse-assessed WC measurement of mental health inpatients within a private psychiatric facility | Mental health nurses working in a private psychiatric hospital in Sydney                    | Pre-post audit of the frequency of WC<br>Documentation before/after intervention | Improved measurement by nurses of WC from 0-58%<br>WC was higher in these patients than general population 19% had BMI within a healthy range, 37% smoked, 31% were hypertensive | No randomization, no control group<br><br>Not all staff were able to receive intervention |
| Thompson et al <sup>43</sup>  | 2011 | Australia | 118 files of service users on antipsychotics under the care of Early Psychosis and Prevention Centre service | Education al intervention for staff<br><br>Development of local guidelines , provision of                | Weight and metabolic monitoring (height and weight to estimate BMI, systolic and diastolic blood pressure, waist and hip | Equipment required to undertake monitoring (e.g. scales, tape measures, blood pressure cuffs) was located in each                                 | Psychiatrists working in an Early Psychosis Prevention and Intervention Centre in Melbourne | Pre-post audit of completion of metabolic screens                                | Improvements in screening and monitoring of four metabolic indices at the post-intervention time point<br><br>Individual rates were higher for screening (74.4% to               | No randomization, no control group<br><br>Naturalistic setting                            |

|  |  |  |  |                                                                               |                                                                                                                                                                                                                                                            |                                                                                                                                                                                                                                                                                     |  |  |                                                                                                                                   |  |
|--|--|--|--|-------------------------------------------------------------------------------|------------------------------------------------------------------------------------------------------------------------------------------------------------------------------------------------------------------------------------------------------------|-------------------------------------------------------------------------------------------------------------------------------------------------------------------------------------------------------------------------------------------------------------------------------------|--|--|-----------------------------------------------------------------------------------------------------------------------------------|--|
|  |  |  |  | <p>monitoring equipment, prompts in patients' records and regular reviews</p> | <p>circumference (to obtain waist-hip ratio), fasting blood glucose, full fasting blood lipid profile (including total cholesterol, low and high density lipoprotein and triglycerides), number of cigarettes smoked daily and level of daily exercise</p> | <p>psychiatrist's room. Stamps that indicated the necessary blood tests for monitoring were placed in the psychiatrist's rooms to aid ordering and completion of the correct blood investigations. Metabolic screening within 6 months of being prescribed an antipsychotic and</p> |  |  | <p>84.9%) than monitoring outcomes (24.4% to 41.6%) Rates ranged between 17.4% for blood lipids to 34.9% for obesity measures</p> |  |
|--|--|--|--|-------------------------------------------------------------------------------|------------------------------------------------------------------------------------------------------------------------------------------------------------------------------------------------------------------------------------------------------------|-------------------------------------------------------------------------------------------------------------------------------------------------------------------------------------------------------------------------------------------------------------------------------------|--|--|-----------------------------------------------------------------------------------------------------------------------------------|--|

|                                    |      |    |                                                                            |                                                                 |                                                             |                                                                                                                                                                                                                                           |                                                                         |                |                                                                                               |                                                                                                             |
|------------------------------------|------|----|----------------------------------------------------------------------------|-----------------------------------------------------------------|-------------------------------------------------------------|-------------------------------------------------------------------------------------------------------------------------------------------------------------------------------------------------------------------------------------------|-------------------------------------------------------------------------|----------------|-----------------------------------------------------------------------------------------------|-------------------------------------------------------------------------------------------------------------|
|                                    |      |    |                                                                            |                                                                 |                                                             | metabolic monitoring between 1 and 6 months following initiation of antipsychotic medication . Regular review of a patient's metabolic status was built into the clinical review process which occurs on a 3-month basis for all patients |                                                                         |                |                                                                                               |                                                                                                             |
| Vasudev & Martindale <sup>42</sup> | 2010 | UK | 66-72 service users aged 14 to 35 under care of Early Intervention service | In-house training for members of the Early Intervention Service | Annual physical health check (weight, blood pressure, blood | Mental health clinicians address physical health with patients during                                                                                                                                                                     | Patients in Early Interventions in Psychosis service in Sunderland were | Pre-post audit | Number of patients having at least one annual physical health check increased from 20% to 58% | No randomization, no control group<br><br>Focuses on Early Intervention so many people do not have a formal |

|  |  |  |                       |                                                                                                                                                                                                                                           |                                                                                                                                                                                   |                                                                                                                                          |                                                  |  |                                                                                                                                                 |                                                                                                                                |
|--|--|--|-----------------------|-------------------------------------------------------------------------------------------------------------------------------------------------------------------------------------------------------------------------------------------|-----------------------------------------------------------------------------------------------------------------------------------------------------------------------------------|------------------------------------------------------------------------------------------------------------------------------------------|--------------------------------------------------|--|-------------------------------------------------------------------------------------------------------------------------------------------------|--------------------------------------------------------------------------------------------------------------------------------|
|  |  |  | for more than a month | Interventions between audit – in-house training, physical health mandatory component on care plan review, joint responsibility for communicating with GP, referral information updated to include physical health, liaison with wider MDT | sugar, lipids, electrocardiogram (only done if patient at high risk due to young patient age), full blood count, urea and serum electrolytes, liver function tests and prolactin) | clinical practice and letters are sent annually to GPs to remind them to conduct the physical health checks (study audited this process) | recruited; screening takes place in primary care |  | Patients who had undergone physical health check at re-audit, a record of some/all of the checks was available in the notes for 75% of patients | diagnosis of SMI e.g. schizophrenia<br><br>Only 7 months between audits, therefore very short time to measure long term impact |
|--|--|--|-----------------------|-------------------------------------------------------------------------------------------------------------------------------------------------------------------------------------------------------------------------------------------|-----------------------------------------------------------------------------------------------------------------------------------------------------------------------------------|------------------------------------------------------------------------------------------------------------------------------------------|--------------------------------------------------|--|-------------------------------------------------------------------------------------------------------------------------------------------------|--------------------------------------------------------------------------------------------------------------------------------|

|                            |      |           |                                                     |                                                                                                                                                                                                                                                                |                                                                            |                                                                                                                                                                                                                                                                                                                            |                                                                                                                                                                                                              |                                   |                                                                                                                                      |                                                                                                                                 |
|----------------------------|------|-----------|-----------------------------------------------------|----------------------------------------------------------------------------------------------------------------------------------------------------------------------------------------------------------------------------------------------------------------|----------------------------------------------------------------------------|----------------------------------------------------------------------------------------------------------------------------------------------------------------------------------------------------------------------------------------------------------------------------------------------------------------------------|--------------------------------------------------------------------------------------------------------------------------------------------------------------------------------------------------------------|-----------------------------------|--------------------------------------------------------------------------------------------------------------------------------------|---------------------------------------------------------------------------------------------------------------------------------|
| Wilson et al <sup>48</sup> | 2014 | Australia | 107 to 232 service users attending clozapine clinic | Six education sessions covering test interpretation, MS, diabetes management, obesity, smoking cessation and lifestyle interventions<br>“Let’s Get Physical” initiative – designation of two months annually as physical health months (PHM) during which time | Metabolic monitoring (including fasting blood glucose, lipids, BMI, girth) | Metabolic monitoring occurs in May and November (designed as ‘physical health months’). In the months preceding May and November, investigation order forms were attached to charts for provision by administrators, written information about investigations was provided to patients during consultations, and necessary | Patients on clozapine and staff at Metro North Mental Health – Royal Brisbane and Women’s Hospital, which provides assessment and specialist services to a socio-economically diverse population in Brisbane | Quality Improvement Mixed Methods | Completion rates of metabolic monitoring: 69.2% at first month and 65.1% at second month<br>Limited evidence of actions post results | No randomization, no control group<br><br>Limited possibility of generalization due to single site and very specific population |
|----------------------------|------|-----------|-----------------------------------------------------|----------------------------------------------------------------------------------------------------------------------------------------------------------------------------------------------------------------------------------------------------------------|----------------------------------------------------------------------------|----------------------------------------------------------------------------------------------------------------------------------------------------------------------------------------------------------------------------------------------------------------------------------------------------------------------------|--------------------------------------------------------------------------------------------------------------------------------------------------------------------------------------------------------------|-----------------------------------|--------------------------------------------------------------------------------------------------------------------------------------|---------------------------------------------------------------------------------------------------------------------------------|

|  |  |  |  |                                                                                                                                                                                         |  |                                                                                                                                                                                                                                                         |  |  |  |  |
|--|--|--|--|-----------------------------------------------------------------------------------------------------------------------------------------------------------------------------------------|--|---------------------------------------------------------------------------------------------------------------------------------------------------------------------------------------------------------------------------------------------------------|--|--|--|--|
|  |  |  |  | revised service protocol required metabolic monitoring for all eligible patients<br>Service protocols were revised to require metabolic monitoring of all eligible patients during PHMs |  | equipment was placed in consulting rooms. In May and November, a proforma for recording test results and lifestyle assessments (smoking, exercise, alcohol intake) were attached to charts, and clinic appointments were extended from 20 to 30 minutes |  |  |  |  |
|--|--|--|--|-----------------------------------------------------------------------------------------------------------------------------------------------------------------------------------------|--|---------------------------------------------------------------------------------------------------------------------------------------------------------------------------------------------------------------------------------------------------------|--|--|--|--|

|                           |      |     |                                                                                                        |                                                                                                                                                     |                                                                                                                                                                                                                                                                                                      |                                                                                                 |                                                                                                                                                                                                                                                                                                                  |                                                                        |                                                                                                                                                                                                                                                                                                     |                                                                                                                |
|---------------------------|------|-----|--------------------------------------------------------------------------------------------------------|-----------------------------------------------------------------------------------------------------------------------------------------------------|------------------------------------------------------------------------------------------------------------------------------------------------------------------------------------------------------------------------------------------------------------------------------------------------------|-------------------------------------------------------------------------------------------------|------------------------------------------------------------------------------------------------------------------------------------------------------------------------------------------------------------------------------------------------------------------------------------------------------------------|------------------------------------------------------------------------|-----------------------------------------------------------------------------------------------------------------------------------------------------------------------------------------------------------------------------------------------------------------------------------------------------|----------------------------------------------------------------------------------------------------------------|
| Xiong et al <sup>30</sup> | 2015 | USA | Patients were receiving outpatient mental health treatment at four mental health clinics in California | Comparison of preventive services used in an integrated behavioural health primary care clinic with two existing community mental health programmes | Cancer services included the following tests/procedures: mammogram, Papanicolaou test, prostate specific antigen test, digital rectal exam, fecal occult blood test, and flexible sigmoidoscopy or colonoscopy. Metabolic profile included blood pressure, height and weight, cholesterol, and blood | Psychiatrists made referrals to primary care doctors for screening in routine clinical practice | Screening was undertaken by various clinical staff and took place in primary care (via referral from two community mental health clinics) and in an Integrated Behavioral Health Primary Care programme housed in the Sacramento County Primary Care Clinic with access to on-site laboratory and x-ray services | Cross-sectional study comparing use of preventive services 350 surveys | Patients on antipsychotic medication were less likely to use preventive non-cancer services than their comparison group ( $p = 0.04$ )<br><br>Integrated Behavioral Health Primary Care unit associated with higher overall service utilization than a community mental health team ( $p < 0.001$ ) | No randomization, no control group<br><br>Unable to adjust for confounding factors such as severity of illness |
|---------------------------|------|-----|--------------------------------------------------------------------------------------------------------|-----------------------------------------------------------------------------------------------------------------------------------------------------|------------------------------------------------------------------------------------------------------------------------------------------------------------------------------------------------------------------------------------------------------------------------------------------------------|-------------------------------------------------------------------------------------------------|------------------------------------------------------------------------------------------------------------------------------------------------------------------------------------------------------------------------------------------------------------------------------------------------------------------|------------------------------------------------------------------------|-----------------------------------------------------------------------------------------------------------------------------------------------------------------------------------------------------------------------------------------------------------------------------------------------------|----------------------------------------------------------------------------------------------------------------|



|  |  |  |  |  |                                                                                                                                             |  |  |  |  |  |
|--|--|--|--|--|---------------------------------------------------------------------------------------------------------------------------------------------|--|--|--|--|--|
|  |  |  |  |  | sugar for diabetes. Infection preventive services included influenza immunization, Hepatitis C Virus and Human Immunodeficiency Virus tests |  |  |  |  |  |
|--|--|--|--|--|---------------------------------------------------------------------------------------------------------------------------------------------|--|--|--|--|--|
